# Supplementary material for: Investigating causal associations among gut microbiota, gut microbiota-derived metabolites, and gestational diabetes mellitus: a bidirectional Mendelian randomization study
Source: PubMed Central journal article supplement (PMC10497006; doi:10.18632/aging.204973), 2023-08-23
Supplement: aging-15-204973-s004.pdf [file aging-15-204973-s004.pdf]

**Supplementary Table 3. Tests for detecting horizontal and directional pleiotropy in forward MR analysis.**

| Exposure       | MR-PRESSO global test     |         | MR-Egger intercept pEgger |                   |         | Cochran's Q test |                 |       |
|----------------|---------------------------|---------|---------------------------|-------------------|---------|------------------|-----------------|-------|
|                | MR-PRESSO<br>RSSobs       | P value | Egger-<br>intercept       | Standard<br>Error | P value | IVW<br>(P)       | MR-Egger<br>(P) |       |
| Gut microbiota | <i>Collinsella</i>        | 11.512  | 0.409                     | -0.044            | 0.035   | 0.252            | 0.341           | 0.391 |
|                | <i>Oscillibacter</i>      | 7.355   | 0.905                     | -0.025            | 0.027   | 0.372            | 0.903           | 0.910 |
|                | <i>Coprobacter</i>        | 3.576   | 0.960                     | -0.025            | 0.031   | 0.445            | 0.969           | 0.973 |
|                | <i>Olsenella</i>          | 13.639  | 0.315                     | 0.003             | 0.029   | 0.921            | 0.261           | 0.190 |
|                | <i>Lachnoclostridium</i>  | 20.241  | 0.167                     | -0.005            | 0.031   | 0.855            | 0.138           | 0.101 |
|                | <i>Prevotella9</i>        | 6.633   | 0.977                     | -0.015            | 0.021   | 0.467            | 0.973           | 0.972 |
|                | <i>Methanobrevibacter</i> | 6.006   | 0.568                     | 0.074             | 0.043   | 0.162            | 0.950           | 0.901 |
|                | <i>Ruminococcus2</i>      | 17.376  | 0.363                     | 0.009             | 0.017   | 0.597            | 0.363           | 0.314 |
|                | Serine                    | 27.181  | 0.651                     | 0.011             | 0.012   | 0.362            | 0.589           | 0.583 |
|                | Pyruvate                  | 9.313   | 0.802                     | 0.027             | 0.021   | 0.218            | 0.808           | 0.874 |
| Gut metabolite | Pipecolate                | 7.775   | 0.802                     | -0.001            | 0.023   | 0.962            | 0.807           | 0.731 |
|                | Indoleacetate             | 25.269  | 0.175                     | -0.011            | 0.011   | 0.314            | 0.128           | 0.137 |
|                | Glycodeoxycholate         | 3.880   | 0.751                     | 0.013             | 0.048   | 0.803            | 0.758           | 0.636 |
|                | Adrenate                  | 3.852   | 0.957                     | -0.001            | 0.021   | 0.963            | 0.954           | 0.919 |
|                | Carnitine                 | 168.085 | 0.185                     | -0.004            | 0.005   | 0.483            | 0.174           | 0.167 |
|                | Phenylacetate             | 5.637   | 0.803                     | -0.005            | 0.017   | 0.776            | 0.869           | 0.798 |

**Supplementary Table 4. Reverse MR analyses of GDM on gut microbiota by different methods.**

| Outcome                   | Inverse variance<br>weighted |       | Maximum likelihood       |       | Weighted median          |       | MR.RAPS                  |       | MR Egger                 |       |
|---------------------------|------------------------------|-------|--------------------------|-------|--------------------------|-------|--------------------------|-------|--------------------------|-------|
|                           | $\beta$ (95%CI)              | P     | $\beta$ (95%CI)          | P     | $\beta$ (95%CI)          | P     | $\beta$ (95%CI)          | P     | $\beta$ (95%CI)          | P     |
| <i>Collinsella</i>        | -0.022<br>(-0.103,0.058)     | 0.592 | -0.023<br>(-0.102,0.057) | 0.581 | 0.004<br>(-0.100,0.107)  | 0.941 | -0.035<br>(-0.089,0.019) | 0.203 | -0.38<br>(-0.431,0.355)  | 0.872 |
| <i>Oscillibacter</i>      | -0.004<br>(-0.116,0.111)     | 0.951 | -0.04<br>(-0.118,0.111)  | 0.950 | -0.014<br>(-0.157,0.128) | 0.842 | 0.049<br>(-0.029,0.127)  | 0.221 | 0.033<br>(-0.466,0.533)  | 0.913 |
| <i>Coprobacter</i>        | -0.037<br>(-0.107,0.033)     | 0.302 | -0.038<br>(-0.109,0.033) | 0.290 | -0.023<br>(-0.109,0.063) | 0.600 | -0.009<br>(-0.058,0.039) | 0.700 | 0.153<br>(0.126,0.433)   | 0.390 |
| <i>Olsenella</i>          | 0.068<br>(-0.090,0.225)      | 0.401 | 0.068<br>(-0.09,0.226)   | 0.400 | 0.005<br>(-0.183,0.193)  | 0.962 | 0.055<br>(-0.053,0.162)  | 0.320 | 0.048<br>(-0.579,0.676)  | 0.890 |
| <i>Lachnoclostridium</i>  | 0.097<br>(-0.058,0.252)      | 0.222 | 0.096<br>(-0.058,0.253)  | 0.221 | 0.077<br>(-0.107,0.261)  | 0.410 | 0.008<br>(-0.098,0.114)  | 0.881 | 0.126<br>(-0.490,0.742)  | 0.731 |
| <i>Prevotella9</i>        | 0.032<br>(-0.076,0.139)      | 0.564 | 0.032<br>(-0.069,0.133)  | 0.532 | 0.016<br>(-0.104,0.135)  | 0.798 | 0.002<br>(-0.066,0.070)  | 0.964 | 0.260<br>(-0.150,0.670)  | 0.340 |
| <i>Methanobrevibacter</i> | 0.006<br>(-0.119,0.131)      | 0.920 | 0.007<br>(-0.087,0.100)  | 0.893 | 0.020<br>(-0.102,0.142)  | 0.753 | 0.027<br>(-0.036,0.090)  | 0.403 | -0.086<br>(-0.684,0.511) | 0.800 |
| <i>Ruminococcus2</i>      | 0.018<br>(-0.078,0.113)      | 0.710 | 0.018<br>(-0.058,0.046)  | 0.642 | -0.021<br>(-0.119,0.077) | 0.680 | -0.006<br>(-0.058,0.046) | 0.826 | 0.111<br>(-0.337,0.558)  | 0.676 |

**Supplementary Table 5. Tests for detecting horizontal and directional pleiotropy in reverse MR analysis.**

| Exposure       | MR-PRESSO global test     |         | MR-Egger intercept pEgger |                   |         | Cochran's Q test |              |       |
|----------------|---------------------------|---------|---------------------------|-------------------|---------|------------------|--------------|-------|
|                | MR-PRESSO<br>RSSobs       | P value | Egger-intercept           | Standard<br>error | P value | IVW (P)          | MR-Egger (P) |       |
| Gut microbiota | <i>Collinsella</i>        | 7.280   | 0.377                     | 0.003             | 0.037   | 0.943            | 0.366        | 0.206 |
|                | <i>Oscillibacter</i>      | 5.403   | 0.432                     | -0.043            | 0.038   | 0.377            | 0.324        | 0.348 |
|                | <i>Coprobacter</i>        | 5.260   | 0.512                     | -0.007            | 0.047   | 0.895            | 0.485        | 0.298 |
|                | <i>Olsenella</i>          | 0.794   | 0.935                     | -0.005            | 0.058   | 0.934            | 0.932        | 0.807 |
|                | <i>Lachnoclostridium</i>  | 4.161   | 0.564                     | -0.036            | 0.026   | 0.301            | 0.503        | 0.802 |
|                | <i>Prevotella9</i>        | 12.033  | 0.235                     | 0.017             | 0.056   | 0.783            | 0.136        | 0.071 |
|                | <i>Methanobrevibacter</i> | 2.462   | 0.730                     | 0.003             | 0.059   | 0.956            | 0.736        | 0.531 |
|                | <i>Ruminococcus2</i>      | 9.898   | 0.266                     | -0.017            | 0.042   | 0.715            | 0.189        | 0.112 |
|                | Serine                    | 306.675 | 0.049                     | 0.009             | 0.006   | 0.217            | 0.002        | 0.026 |
| Gut metabolite | Pyruvate                  | -29.025 | 0.001                     | -0.022            | 0.005   | 0.028            | 0.001        | 0.714 |
|                | Pipecolate                | 1.836   | 0.882                     | 0.004             | 0.006   | 0.548            | 0.873        | 0.856 |
|                | Indoleacetate             | 1.764   | 0.887                     | 0.003             | 0.005   | 0.635            | 0.852        | 0.783 |
|                | Glycodeoxycholate         | 6.721   | 0.446                     | -0.024            | 0.023   | 0.357            | 0.279        | 0.302 |
|                | Adrenate                  | 15.901  | 0.172                     | -0.001            | 0.009   | 0.973            | 0.034        | 0.015 |
|                | Carnitine                 | 37.744  | 0.076                     | -0.005            | 0.002   | 0.115            | 0.061        | 0.073 |
|                | Phenylacetate             | 11.931  | 0.257                     | 0.011             | 0.007   | 0.208            | 0.137        | 0.287 |

**Supplementary Table 6. Reverse MR analyses of GDM on gut metabolites by different methods.**

| Outcome           | Inverse variance weighted |       | Maximum likelihood        |       | Weighted median           |       | MR.RAPS                    |       | MR Egger                 |       |
|-------------------|---------------------------|-------|---------------------------|-------|---------------------------|-------|----------------------------|-------|--------------------------|-------|
|                   | $\beta$ (95%CI)           | P     | $\beta$ (95%CI)           | P     | $\beta$ (95%CI)           | P     | $\beta$ (95%CI)            | P     | $\beta$ (95%CI)          | P     |
| Serine            | 0.004<br>(-0.019,0.027)   | 0.711 | 0.005<br>(-0.007,0.016)   | 0.438 | 0.001<br>(-0.012,0.013)   | 0.934 | 0.005<br>(-0.007,0.016)    | 0.430 | -0.034<br>(-0.085,0.018) | 0.290 |
| Pyruvate          | -0.016<br>(-0.058,0.027)  | 0.470 | -0.017<br>(-0.037,0.004)  | 0.120 | -0.002<br>(-0.026,0.022)  | 0.880 | -0.017<br>(-0.036,0.003)   | 0.107 | 0.080<br>(0.029,0.132)   | 0.054 |
| Pipecolate        | 0.003<br>(-0.017,0.023)   | 0.790 | 0.003<br>(-0.017,0.023)   | 0.790 | -0.001<br>(-0.023,0.022)  | 0.960 | 0.003<br>(-0.017,0.023)    | 0.790 | -0.014<br>(-0.066,0.038) | 0.640 |
| Indoleacetate     | -0.002<br>(-0.020,0.016)  | 0.810 | -0.002<br>(-0.020,0.016)  | 0.810 | -0.001<br>(-0.021,0.019)  | 0.930 | -0.002<br>(-0.020,0.016)   | 0.820 | -0.014<br>(-0.061,0.033) | 0.610 |
| Glycodeoxycholate | -0.058<br>(-0.138,0.023)  | 0.160 | -0.058<br>(-0.130,0.014)  | 0.113 | -0.052<br>(-0.132,0.027)  | 0.200 | -0.058<br>(-0.131,0.015)   | 0.117 | 0.042<br>(-0.155,0.240)  | 0.703 |
| Adrenate          | -0.019<br>(-0.048,0.009)  | 0.177 | -0.020<br>(-0.038,-0.002) | 0.029 | -0.023<br>(-0.044,-0.003) | 0.026 | -0.020<br>(-0.042,0.001)   | 0.057 | -0.018<br>(-0.104,0.068) | 0.708 |
| Carnitine         | -0.006<br>(-0.018,0.007)  | 0.390 | -0.006<br>(-0.012,0.000)  | 0.059 | -0.003<br>(-0.011,0.005)  | 0.495 | -0.006<br>(-60.766,90.754) | 0.053 | 0.016<br>(-0.005,0.037)  | 0.236 |
| Phenylacetate     | -0.015<br>(-0.043,0.013)  | 0.300 | -0.015<br>(-0.036,0.006)  | 0.170 | -0.020<br>(-0.048,0.007)  | 0.150 | -0.015<br>(-0.037,0.007)   | 0.170 | -0.063<br>(-0.126,0.001) | 0.150 |

**Supplementary Table 7. Metabolic pathway associated with GDM.**

| <b>Metabolic pathway</b>                    | <b>Involved metabolites</b> | <b><i>P</i> value</b> | <b>Database</b>  |
|---------------------------------------------|-----------------------------|-----------------------|------------------|
| Phenylalanine metabolism                    | Phenylacetic acid           | 0.026                 | KEGG SMP         |
| Citrate cycle (TCA cycle)                   | Pyruvate                    | 0.041                 | KEGG SMP         |
| Pyruvate metabolism                         | Pyruvate                    | 0.056                 | KEGG SMP         |
| Lysine degradation                          | L-Pipecolate                | 0.063                 | KEGG SMP         |
| Glycolysis / Gluconeogenesis                | Pyruvate                    | 0.065                 | KEGG SMP SMP     |
| Alanine, aspartate and glutamate metabolism | Pyruvate                    | 0.070                 | KEGG SMP SMP SMP |
| Glyoxylate and dicarboxylate metabolism     | Pyruvate                    | 0.080                 | KEGG             |
| Glycine, serine and threonine metabolism    | Pyruvate                    | 0.083                 | KEGG SMP         |
| Cysteine and methionine metabolism          | Pyruvate                    | 0.083                 | KEGG SMP SMP     |
| Arginine and proline metabolism             | Pyruvate                    | 0.095                 | KEGG SMP         |
| Tryptophan metabolism                       | Indole-3-acetate            | 0.102                 | KEGG SMP         |
| Tyrosine metabolism                         | Pyruvate                    | 0.104                 | KEGG SMP SMP     |

**Supplementary Table 8. Detailed information for genome-wide association studies involved in the present Mendelian randomization study.**

| Variable                | Consortium or study | Sample size | Journal    | Year | Cohort        | Nation of cohort | Number of samples              |
|-------------------------|---------------------|-------------|------------|------|---------------|------------------|--------------------------------|
|                         |                     |             |            |      | BSPSPC        | Germany          | 721                            |
|                         |                     |             |            |      | CARDIAw       | USA              | 257                            |
|                         |                     |             |            |      | COPSAC        | Denmark          | 380                            |
|                         |                     |             |            |      | DanFunD16     | Denmark          | 2,396                          |
|                         |                     |             |            |      | FGFP          | Belgian          | 2,259                          |
|                         |                     |             |            |      | FOCUS         | Germany          | 960                            |
|                         |                     |             |            |      | GEM_HCE_v12   | Canada           | 378                            |
|                         |                     |             |            |      | GEM_HCE_v24   | Canada           | 203                            |
|                         |                     |             |            |      | GEM_ICHIP_HCE | Canada           | 662                            |
|                         |                     |             |            |      | GenR          | The Netherlands  | 1,328                          |
|                         |                     |             |            |      | HCHS/SOL      | USA              | 1,097                          |
| <b>Gut microbiota</b>   | MiBioGen            | 18,340      | Nat Genet. | 2021 | KSCS          | South Korea      | 811                            |
|                         |                     |             |            |      | LLD           | The Netherlands  | 875                            |
|                         |                     |             |            |      | METSIM        | Finland          | 522                            |
|                         |                     |             |            |      | MIBS          | The Netherlands  | 80                             |
|                         |                     |             |            |      | NGRC          | USA              | 77                             |
|                         |                     |             |            |      | NTR           | The Netherlands  | 279                            |
|                         |                     |             |            |      | PNP           | Israel           | 481                            |
|                         |                     |             |            |      | POPCOL        | Sweden           | 134                            |
|                         |                     |             |            |      | RS3           | The Netherlands  | 1,220                          |
|                         |                     |             |            |      | SHIP          | Germany          | 996                            |
|                         |                     |             |            |      | SHIP-TREND    | Germany          | 905                            |
|                         |                     |             |            |      | TwinsUK       | UK               | 1,205                          |
| <b>Gut metabolites</b>  | TwinsUK, KORA F4    | 7,824       | Nat Genet. | 2017 | KORA F4       | Germany          | 1,768                          |
|                         |                     |             |            |      | TwinsUK       | UK               | 6,056                          |
| <b>BMI</b>              | UK Biobank          | 461,460     |            | 2018 | UK Biobank    | European         | 461,460                        |
| <b>alcohol drinking</b> | UK Biobank          | 462,346     |            | 2018 | UK Biobank    | European         | 462,346                        |
| <b>smoking</b>          | GSCAN               | 607,291     |            | 2019 | GSCAN         | European         | 311,629 cases/321,173 controls |
| <b>hypertension</b>     | UK Biobank          | 462,346     |            | 2018 | UK Biobank    | European         | 462,346                        |
| <b>GDM</b>              | FinnGen             | 123,579     |            | 2021 | FinnGen       | European         | 5,687 cases/117,892 controls   |
