# Supplementary material for: Investigating causal associations among gut microbiota, gut microbiota-derived metabolites, and gestational diabetes mellitus: a bidirectional Mendelian randomization study
Source: Aging (Albany NY). 2023 Aug 23;15(16):8345–66. doi: 10.18632/aging.204973 (PMC10497006; doi:10.18632/aging.204973)
Supplement: Supplementary Table 1 [file aging-15-204973-s002.xlsx]

## Sheet: Table S1
Supplementary Table 1. Genome-wide significant and independent SNPs that were used as instruments for gut microbiota.
Trait	SNPs	Effect Allele	Other Allele	β	Standard Error	P value
genus.Actinomyces.id.423	rs71315246	A	G	-0.097	0.022	9.83e-06
genus.Actinomyces.id.423	rs10787984	G	C	0.094	0.021	9.62e-06
genus.Actinomyces.id.423	rs35110659	T	G	0.077	0.017	9.59e-06
genus.Actinomyces.id.423	rs4073240	G	A	0.075	0.017	7.94e-06
genus.Actinomyces.id.423	rs36009731	A	G	0.08	0.018	7.23e-06
genus.Actinomyces.id.423	rs4962491	C	T	0.169	0.037	6.7e-06
genus.Actinomyces.id.423	rs35011108	A	G	0.233	0.051	6.34e-06
genus.Actinomyces.id.423	rs2715439	C	T	0.075	0.016	6.27e-06
genus.Actinomyces.id.423	rs7915461	T	C	0.188	0.04	5.92e-06
genus.Actinomyces.id.423	rs4146653	G	A	0.099	0.021	4.5e-06
genus.Actinomyces.id.423	rs34583783	G	T	0.127	0.027	4.49e-06
genus.Actinomyces.id.423	rs17072071	C	A	-0.12	0.025	1.33e-06
genus.Adlercreutzia.id.812	rs6811381	T	G	-0.079	0.018	9.77e-06
genus.Adlercreutzia.id.812	rs11604400	C	T	-0.103	0.023	9.74e-06
genus.Adlercreutzia.id.812	rs55719207	G	A	-0.07	0.016	9.61e-06
genus.Adlercreutzia.id.812	rs1534655	C	T	-0.078	0.018	9.23e-06
genus.Adlercreutzia.id.812	rs4557646	T	C	0.137	0.031	8.95e-06
genus.Adlercreutzia.id.812	rs1468569	A	G	0.072	0.016	8.86e-06
genus.Adlercreutzia.id.812	rs9915817	T	C	0.075	0.017	8.22e-06
genus.Adlercreutzia.id.812	rs9966313	T	C	-0.095	0.021	8.21e-06
genus.Adlercreutzia.id.812	rs36008107	C	A	-0.128	0.028	8.11e-06
genus.Adlercreutzia.id.812	rs1881618	C	T	-0.076	0.017	7.97e-06
genus.Adlercreutzia.id.812	rs306577	C	T	-0.105	0.023	7.75e-06
genus.Adlercreutzia.id.812	rs4692824	A	G	-0.076	0.017	7.66e-06
genus.Adlercreutzia.id.812	rs10279572	C	G	0.139	0.031	6.98e-06
genus.Adlercreutzia.id.812	rs6537600	C	T	0.112	0.026	6.71e-06
genus.Adlercreutzia.id.812	rs6971594	G	A	0.139	0.031	6.65e-06
genus.Adlercreutzia.id.812	rs7706425	C	G	-0.071	0.016	6.62e-06
genus.Adlercreutzia.id.812	rs12650418	T	C	-0.084	0.019	6.6e-06
genus.Adlercreutzia.id.812	rs1046175	C	G	0.113	0.026	6.36e-06
genus.Adlercreutzia.id.812	rs11663349	G	A	-0.131	0.029	6.27e-06
genus.Adlercreutzia.id.812	rs10233106	C	T	0.14	0.031	5.51e-06
genus.Adlercreutzia.id.812	rs34899151	G	A	-0.13	0.028	5.32e-06
genus.Adlercreutzia.id.812	rs255373	A	T	-0.071	0.016	5.29e-06
genus.Adlercreutzia.id.812	rs2717139	G	A	-0.114	0.025	5.25e-06
genus.Adlercreutzia.id.812	rs6664405	T	C	-0.095	0.021	5.23e-06
genus.Adlercreutzia.id.812	rs13231526	C	A	0.143	0.031	4.81e-06
genus.Adlercreutzia.id.812	rs9637706	C	T	-0.082	0.018	4.74e-06
genus.Adlercreutzia.id.812	rs1919502	G	A	-0.082	0.018	4.73e-06
genus.Adlercreutzia.id.812	rs2717136	C	T	-0.13	0.028	4.58e-06
genus.Adlercreutzia.id.812	rs1406514	A	G	-0.081	0.018	4.54e-06
genus.Adlercreutzia.id.812	rs12522517	A	T	-0.105	0.023	4.41e-06
genus.Adlercreutzia.id.812	rs255375	G	T	-0.072	0.016	4.38e-06
genus.Adlercreutzia.id.812	rs1528956	C	T	-0.081	0.018	4.09e-06
genus.Adlercreutzia.id.812	rs4869118	C	T	-0.073	0.016	3.51e-06
genus.Adlercreutzia.id.812	rs1528942	T	G	-0.083	0.018	3.25e-06
genus.Adlercreutzia.id.812	rs2850883	G	A	-0.117	0.025	3.09e-06
genus.Adlercreutzia.id.812	rs9490822	C	T	-0.073	0.016	2.54e-06
genus.Adlercreutzia.id.812	rs7656076	C	G	-0.084	0.018	2.43e-06
genus.Adlercreutzia.id.812	rs34181676	G	T	-0.135	0.028	2.34e-06
genus.Adlercreutzia.id.812	rs2717140	C	T	-0.119	0.025	2.05e-06
genus.Adlercreutzia.id.812	rs80078995	A	T	-0.113	0.023	1.57e-06
genus.Adlercreutzia.id.812	rs2147798	C	G	0.092	0.019	1.4e-06
genus.Adlercreutzia.id.812	rs7680684	C	T	-0.083	0.017	9.77e-07
genus.Akkermansia.id.4037	rs11184340	G	A	0.063	0.014	9.95e-06
genus.Akkermansia.id.4037	rs28613890	T	C	0.064	0.014	9.91e-06
genus.Akkermansia.id.4037	rs12904881	A	G	0.058	0.013	9.78e-06
genus.Akkermansia.id.4037	rs76564762	T	C	0.104	0.024	9.67e-06
genus.Akkermansia.id.4037	rs74399905	A	T	0.103	0.023	9.41e-06
genus.Akkermansia.id.4037	rs10005131	G	T	0.061	0.014	9.27e-06
genus.Akkermansia.id.4037	rs1988252	A	G	0.063	0.014	9.27e-06
genus.Akkermansia.id.4037	rs10516447	G	A	0.103	0.023	9.25e-06
genus.Akkermansia.id.4037	rs941682	G	A	-0.063	0.014	9.17e-06
genus.Akkermansia.id.4037	rs2865331	A	G	0.062	0.014	9.09e-06
genus.Akkermansia.id.4037	rs28858161	C	T	0.063	0.014	8.83e-06
genus.Akkermansia.id.4037	rs28811282	A	G	0.063	0.014	8.75e-06
genus.Akkermansia.id.4037	rs36010840	T	C	0.063	0.014	8.56e-06
genus.Akkermansia.id.4037	rs72663802	T	C	0.065	0.015	8.5e-06
genus.Akkermansia.id.4037	rs12024893	G	A	0.063	0.014	8.42e-06
genus.Akkermansia.id.4037	rs4595371	G	A	0.063	0.014	8.32e-06
genus.Akkermansia.id.4037	rs4294419	A	G	0.063	0.014	8.32e-06
genus.Akkermansia.id.4037	rs736124	A	T	-0.074	0.017	8.29e-06
genus.Akkermansia.id.4037	rs12411321	C	T	0.073	0.017	7.8e-06
genus.Akkermansia.id.4037	rs4600885	C	A	0.063	0.014	7.76e-06
genus.Akkermansia.id.4037	rs7538356	C	A	0.064	0.014	7.58e-06
genus.Akkermansia.id.4037	rs72663751	A	G	0.065	0.015	7.55e-06
genus.Akkermansia.id.4037	rs4107636	C	G	0.063	0.014	7.47e-06
genus.Akkermansia.id.4037	rs72663785	G	C	0.066	0.015	7.33e-06
genus.Akkermansia.id.4037	rs2199602	T	G	0.066	0.015	7.24e-06
genus.Akkermansia.id.4037	rs72663769	C	T	0.066	0.015	7.03e-06
genus.Akkermansia.id.4037	rs12026127	A	G	0.064	0.014	6.97e-06
genus.Akkermansia.id.4037	rs79837054	C	T	0.106	0.024	6.96e-06
genus.Akkermansia.id.4037	rs12045978	A	G	0.064	0.014	6.73e-06
genus.Akkermansia.id.4037	rs4497215	T	C	0.064	0.014	6.41e-06
genus.Akkermansia.id.4037	rs61779207	G	A	-0.076	0.017	6.32e-06
genus.Akkermansia.id.4037	rs7693865	T	C	0.107	0.024	5.54e-06
genus.Akkermansia.id.4037	rs72663782	C	G	0.066	0.014	5.25e-06
genus.Akkermansia.id.4037	rs3995795	C	T	0.064	0.014	5.22e-06
genus.Akkermansia.id.4037	rs6668273	A	G	0.065	0.014	4.99e-06
genus.Akkermansia.id.4037	rs72663787	A	G	0.066	0.015	4.9e-06
genus.Akkermansia.id.4037	rs11724791	A	G	0.066	0.014	4.89e-06
genus.Akkermansia.id.4037	rs72663756	T	C	0.067	0.015	4.8e-06
genus.Akkermansia.id.4037	rs59317921	T	C	0.063	0.014	4.51e-06
genus.Akkermansia.id.4037	rs1605923	G	T	0.066	0.014	4.49e-06
genus.Akkermansia.id.4037	rs113653192	T	C	0.108	0.024	4.27e-06
genus.Akkermansia.id.4037	rs12501826	C	G	0.067	0.014	4.11e-06
genus.Akkermansia.id.4037	rs11184341	G	C	0.066	0.014	4.06e-06
genus.Akkermansia.id.4037	rs12498518	T	C	0.067	0.014	3.99e-06
genus.Akkermansia.id.4037	rs6832927	A	C	0.109	0.024	3.85e-06
genus.Akkermansia.id.4037	rs12416161	T	C	0.076	0.017	3.73e-06
genus.Akkermansia.id.4037	rs77055143	T	C	0.067	0.014	3.71e-06
genus.Akkermansia.id.4037	rs111862613	T	C	0.091	0.02	3.39e-06
genus.Akkermansia.id.4037	rs11252894	A	C	0.077	0.017	3.15e-06
genus.Akkermansia.id.4037	rs6832119	G	A	0.11	0.024	3.13e-06
genus.Akkermansia.id.4037	rs2169719	G	A	0.068	0.015	3.09e-06
genus.Akkermansia.id.4037	rs117107102	A	G	0.204	0.043	3.01e-06
genus.Akkermansia.id.4037	rs4242783	G	A	0.069	0.015	3e-06
genus.Akkermansia.id.4037	rs2602429	C	T	0.075	0.016	2.72e-06
genus.Akkermansia.id.4037	rs9349825	A	G	-0.07	0.015	2.6e-06
genus.Akkermansia.id.4037	rs56161035	T	C	0.068	0.014	2.37e-06
genus.Akkermansia.id.4037	rs12908520	G	A	0.062	0.013	2.26e-06
genus.Akkermansia.id.4037	rs1491244	T	A	0.111	0.024	2.25e-06
genus.Akkermansia.id.4037	rs112769434	G	A	0.112	0.024	1.96e-06
genus.Akkermansia.id.4037	rs74542928	T	C	0.113	0.024	1.48e-06
genus.Akkermansia.id.4037	rs4936098	A	G	0.065	0.014	1.1e-06
genus.Akkermansia.id.4037	rs113634144	T	G	0.074	0.015	1.02e-06
genus.Akkermansia.id.4037	rs11729256	T	C	0.075	0.015	6.58e-07
genus.Alistipes.id.968	rs11766494	T	C	-0.048	0.011	9.98e-06
genus.Alistipes.id.968	rs6964425	C	T	-0.048	0.011	9.84e-06
genus.Alistipes.id.968	rs8118820	T	A	-0.063	0.014	9.69e-06
genus.Alistipes.id.968	rs8188507	T	C	-0.048	0.011	9.64e-06
genus.Alistipes.id.968	rs10950094	C	G	-0.049	0.011	9.34e-06
genus.Alistipes.id.968	rs11958296	A	G	-0.098	0.022	9.3e-06
genus.Alistipes.id.968	rs4717397	A	G	-0.049	0.011	9.29e-06
genus.Alistipes.id.968	rs2150413	T	C	-0.048	0.011	9.23e-06
genus.Alistipes.id.968	rs13246203	G	A	-0.049	0.011	9.16e-06
genus.Alistipes.id.968	rs2290844	C	T	0.081	0.019	9.1e-06
genus.Alistipes.id.968	rs10950089	T	C	-0.049	0.011	9.09e-06
genus.Alistipes.id.968	rs10434981	A	G	-0.049	0.011	9.05e-06
genus.Alistipes.id.968	rs7995332	A	C	0.071	0.017	8.97e-06
genus.Alistipes.id.968	rs67853823	T	C	-0.048	0.011	8.88e-06
genus.Alistipes.id.968	rs2875322	T	C	-0.058	0.013	8.78e-06
genus.Alistipes.id.968	rs4498432	C	G	-0.048	0.011	8.55e-06
genus.Alistipes.id.968	rs1115881	A	G	-0.048	0.011	8.27e-06
genus.Alistipes.id.968	rs2297256	A	G	-0.048	0.011	8.21e-06
genus.Alistipes.id.968	rs12990744	C	T	-0.078	0.017	8.21e-06
genus.Alistipes.id.968	rs4818001	C	T	-0.048	0.011	8.05e-06
genus.Alistipes.id.968	rs10950056	C	G	-0.049	0.011	7.71e-06
genus.Alistipes.id.968	rs35909684	A	C	-0.085	0.019	7.65e-06
genus.Alistipes.id.968	rs62576416	T	C	0.049	0.011	7.5e-06
genus.Alistipes.id.968	rs4810359	A	G	-0.065	0.015	7.5e-06
genus.Alistipes.id.968	rs1822113	T	G	-0.049	0.011	7.39e-06
genus.Alistipes.id.968	rs8132424	T	A	-0.048	0.011	7.38e-06
genus.Alistipes.id.968	rs4718714	G	A	-0.049	0.011	7.35e-06
genus.Alistipes.id.968	rs2450745	A	C	-0.081	0.018	7.12e-06
genus.Alistipes.id.968	rs8132143	T	A	-0.048	0.011	7.04e-06
genus.Alistipes.id.968	rs34417064	A	G	-0.048	0.011	7.01e-06
genus.Alistipes.id.968	rs2150411	T	G	-0.048	0.011	6.84e-06
genus.Alistipes.id.968	rs62476322	A	G	-0.049	0.011	6.74e-06
genus.Alistipes.id.968	rs2836934	C	A	-0.048	0.011	6.69e-06
genus.Alistipes.id.968	rs3764077	G	A	0.074	0.017	6.61e-06
genus.Alistipes.id.968	rs10950081	T	C	-0.049	0.011	6.43e-06
genus.Alistipes.id.968	rs62476323	A	C	-0.049	0.011	6.29e-06
genus.Alistipes.id.968	rs12539972	C	G	-0.049	0.011	6.29e-06
genus.Alistipes.id.968	rs1822115	G	T	-0.049	0.011	6.14e-06
genus.Alistipes.id.968	rs1837664	C	A	-0.049	0.011	5.85e-06
genus.Alistipes.id.968	rs7337526	T	C	0.074	0.017	5.83e-06
genus.Alistipes.id.968	rs73180681	T	C	0.074	0.017	5.78e-06
genus.Alistipes.id.968	rs2323487	T	A	0.074	0.017	5.52e-06
genus.Alistipes.id.968	rs12534925	G	T	-0.049	0.011	5.52e-06
genus.Alistipes.id.968	rs1960663	C	T	-0.05	0.011	5.5e-06
genus.Alistipes.id.968	rs148278255	G	A	-0.049	0.011	5.48e-06
genus.Alistipes.id.968	rs1689282	A	C	-0.052	0.011	5.28e-06
genus.Alistipes.id.968	rs17055871	A	T	0.074	0.017	5.19e-06
genus.Alistipes.id.968	rs4718473	T	C	-0.05	0.011	5.13e-06
genus.Alistipes.id.968	rs7324216	T	C	0.075	0.017	5e-06
genus.Alistipes.id.968	rs11088466	A	T	-0.049	0.011	4.99e-06
genus.Alistipes.id.968	rs1899238	T	C	-0.05	0.011	4.96e-06
genus.Alistipes.id.968	rs11763175	A	G	-0.05	0.011	4.9e-06
genus.Alistipes.id.968	rs8130320	A	G	-0.049	0.011	4.84e-06
genus.Alistipes.id.968	rs7805099	T	G	-0.05	0.011	4.78e-06
genus.Alistipes.id.968	rs2311507	T	C	-0.05	0.011	4.64e-06
genus.Alistipes.id.968	rs12536478	C	A	-0.05	0.011	4.58e-06
genus.Alistipes.id.968	rs61946576	C	T	0.075	0.017	4.32e-06
genus.Alistipes.id.968	rs6563551	G	T	0.075	0.017	4.1e-06
genus.Alistipes.id.968	rs6563550	T	C	0.075	0.017	3.97e-06
genus.Alistipes.id.968	rs2119444	A	G	-0.051	0.011	3.95e-06
genus.Alistipes.id.968	rs67281112	G	C	0.063	0.014	3.92e-06
genus.Alistipes.id.968	rs1583863	A	G	-0.051	0.011	3.91e-06
genus.Alistipes.id.968	rs4424138	A	T	-0.05	0.011	3.87e-06
genus.Alistipes.id.968	rs61946592	C	T	0.076	0.017	3.86e-06
genus.Alistipes.id.968	rs1107244	G	A	0.076	0.017	3.59e-06
genus.Alistipes.id.968	rs2311504	A	G	-0.051	0.011	3.43e-06
genus.Alistipes.id.968	rs17675579	G	A	-0.051	0.011	3.38e-06
genus.Alistipes.id.968	rs11773263	T	C	-0.051	0.011	3.17e-06
genus.Alistipes.id.968	rs4717372	G	C	-0.051	0.011	2.73e-06
genus.Alistipes.id.968	rs10950070	A	G	-0.052	0.011	2.58e-06
genus.Alistipes.id.968	rs4068841	G	C	-0.052	0.011	2.55e-06
genus.Alistipes.id.968	rs1595991	C	T	-0.051	0.011	2.53e-06
genus.Alistipes.id.968	rs10950069	T	C	-0.052	0.011	2.46e-06
genus.Alistipes.id.968	rs11773813	A	C	-0.052	0.011	2.42e-06
genus.Alistipes.id.968	rs11771117	C	G	-0.052	0.011	2.29e-06
genus.Alistipes.id.968	rs34890041	A	C	-0.052	0.011	2.13e-06
genus.Alistipes.id.968	rs7783848	G	C	-0.052	0.011	2e-06
genus.Alistipes.id.968	rs7129639	C	A	-0.052	0.011	1.78e-06
genus.Alistipes.id.968	rs2871785	T	G	-0.053	0.011	1.68e-06
genus.Alistipes.id.968	rs67705352	T	G	-0.053	0.011	1.65e-06
genus.Alistipes.id.968	rs11769002	G	A	-0.053	0.011	1.45e-06
genus.Alistipes.id.968	rs9712594	C	A	-0.09	0.018	4.78e-07
genus.Allisonella.id.2174	rs3747507	A	G	0.137	0.03	9.95e-06
genus.Allisonella.id.2174	rs538601	A	G	0.112	0.025	9.83e-06
genus.Allisonella.id.2174	rs12378350	C	T	0.133	0.03	9.8e-06
genus.Allisonella.id.2174	rs34609282	T	C	0.134	0.03	9.42e-06
genus.Allisonella.id.2174	rs594561	C	T	0.112	0.025	9.41e-06
genus.Allisonella.id.2174	rs7898615	T	G	0.168	0.037	8.87e-06
genus.Allisonella.id.2174	rs7848439	A	G	0.138	0.031	8.68e-06
genus.Allisonella.id.2174	rs12550862	C	A	0.139	0.031	8.67e-06
genus.Allisonella.id.2174	rs34754033	G	A	0.136	0.03	8.54e-06
genus.Allisonella.id.2174	rs4743082	G	T	0.134	0.03	8.28e-06
genus.Allisonella.id.2174	rs3747511	G	C	0.134	0.03	8.2e-06
genus.Allisonella.id.2174	rs12552101	C	T	0.136	0.03	8.1e-06
genus.Allisonella.id.2174	rs7041222	C	A	0.135	0.03	7.9e-06
genus.Allisonella.id.2174	rs34954690	G	A	0.134	0.03	7.89e-06
genus.Allisonella.id.2174	rs12554887	G	C	0.142	0.032	7.78e-06
genus.Allisonella.id.2174	rs35623544	G	C	0.135	0.03	7.65e-06
genus.Allisonella.id.2174	rs10981784	T	C	0.135	0.03	7.54e-06
genus.Allisonella.id.2174	rs1564050	G	A	0.135	0.03	7.45e-06
genus.Allisonella.id.2174	rs16919671	C	T	0.135	0.03	7.36e-06
genus.Allisonella.id.2174	rs487355	A	G	-0.173	0.04	7.06e-06
genus.Allisonella.id.2174	rs35241252	T	G	0.139	0.031	6.91e-06
genus.Allisonella.id.2174	rs12554363	T	G	0.135	0.03	6.87e-06
genus.Allisonella.id.2174	rs10981801	A	C	0.136	0.03	6.72e-06
genus.Allisonella.id.2174	rs4014782	T	G	0.14	0.031	6.55e-06
genus.Allisonella.id.2174	rs35788892	G	A	0.136	0.03	6.52e-06
genus.Allisonella.id.2174	rs1123379	C	T	0.136	0.03	6.49e-06
genus.Allisonella.id.2174	rs4742688	T	G	0.136	0.03	6.45e-06
genus.Allisonella.id.2174	rs898869	T	C	0.136	0.03	6.42e-06
genus.Allisonella.id.2174	rs62557462	C	T	0.136	0.03	6.36e-06
genus.Allisonella.id.2174	rs10817504	G	A	0.137	0.03	6.3e-06
genus.Allisonella.id.2174	rs13301045	G	A	0.136	0.03	6.27e-06
genus.Allisonella.id.2174	rs593213	G	A	-0.173	0.04	6.18e-06
genus.Allisonella.id.2174	rs76904847	G	A	0.149	0.033	6.09e-06
genus.Allisonella.id.2174	rs35737497	A	G	0.136	0.03	6.08e-06
genus.Allisonella.id.2174	rs16919506	T	C	0.136	0.03	6.07e-06
genus.Allisonella.id.2174	rs35534888	T	C	0.136	0.03	6.05e-06
genus.Allisonella.id.2174	rs34905303	C	T	0.137	0.03	6.01e-06
genus.Allisonella.id.2174	rs35778718	C	A	0.137	0.03	6.01e-06
genus.Allisonella.id.2174	rs4743083	C	A	0.137	0.03	5.88e-06
genus.Allisonella.id.2174	rs12553259	C	A	0.136	0.03	5.86e-06
genus.Allisonella.id.2174	rs62557463	C	G	0.136	0.03	5.82e-06
genus.Allisonella.id.2174	rs3747504	T	C	0.139	0.03	5.82e-06
genus.Allisonella.id.2174	rs10981800	G	C	0.137	0.03	5.8e-06
genus.Allisonella.id.2174	rs35110698	T	C	-0.146	0.032	5.72e-06
genus.Allisonella.id.2174	rs2401384	C	A	0.137	0.03	5.68e-06
genus.Allisonella.id.2174	rs16919661	C	T	0.137	0.03	5.56e-06
genus.Allisonella.id.2174	rs1564048	T	C	0.137	0.03	5.54e-06
genus.Allisonella.id.2174	rs34870571	A	G	0.137	0.03	5.42e-06
genus.Allisonella.id.2174	rs898870	A	G	0.137	0.03	5.37e-06
genus.Allisonella.id.2174	rs13287095	C	T	0.139	0.03	5.34e-06
genus.Allisonella.id.2174	rs16919675	C	T	0.137	0.03	5.25e-06
genus.Allisonella.id.2174	rs4532668	A	C	0.119	0.026	5.01e-06
genus.Allisonella.id.2174	rs2306090	C	T	0.138	0.03	5e-06
genus.Allisonella.id.2174	rs2306092	G	A	0.138	0.03	5e-06
genus.Allisonella.id.2174	rs4743085	C	T	0.138	0.03	4.99e-06
genus.Allisonella.id.2174	rs1531440	C	T	0.138	0.03	4.99e-06
genus.Allisonella.id.2174	rs13289813	C	T	0.138	0.03	4.93e-06
genus.Allisonella.id.2174	rs3747492	T	C	0.138	0.03	4.91e-06
genus.Allisonella.id.2174	rs685403	G	C	-0.175	0.04	4.88e-06
genus.Allisonella.id.2174	rs13285567	C	A	0.138	0.03	4.8e-06
genus.Allisonella.id.2174	rs3747490	G	T	0.138	0.03	4.8e-06
genus.Allisonella.id.2174	rs3747491	G	A	0.138	0.03	4.8e-06
genus.Allisonella.id.2174	rs12551818	C	T	0.138	0.03	4.73e-06
genus.Allisonella.id.2174	rs7874652	G	A	0.138	0.03	4.48e-06
genus.Allisonella.id.2174	rs4743062	A	C	0.141	0.031	4.41e-06
genus.Allisonella.id.2174	rs10817491	A	G	0.139	0.03	4.27e-06
genus.Allisonella.id.2174	rs2045731	A	G	0.139	0.03	4.26e-06
genus.Allisonella.id.2174	rs2045730	G	A	0.139	0.03	4.26e-06
genus.Allisonella.id.2174	rs35066943	C	T	0.139	0.03	4.26e-06
genus.Allisonella.id.2174	rs3827484	A	G	0.138	0.03	4.18e-06
genus.Allisonella.id.2174	rs7859665	G	A	0.125	0.027	4.05e-06
genus.Allisonella.id.2174	rs4463540	A	G	0.14	0.03	3.97e-06
genus.Allisonella.id.2174	rs3747510	C	T	0.139	0.03	3.92e-06
genus.Allisonella.id.2174	rs1057419	A	G	0.121	0.026	3.91e-06
genus.Allisonella.id.2174	rs10980890	C	T	0.143	0.031	3.76e-06
genus.Allisonella.id.2174	rs12555277	G	C	0.14	0.03	3.73e-06
genus.Allisonella.id.2174	rs6896529	A	G	0.116	0.025	3.73e-06
genus.Allisonella.id.2174	rs1901739	T	G	0.116	0.025	3.59e-06
genus.Allisonella.id.2174	rs7020530	A	G	0.141	0.03	3.51e-06
genus.Allisonella.id.2174	rs4743069	C	A	0.141	0.03	3.45e-06
genus.Allisonella.id.2174	rs7034449	G	A	0.141	0.03	3.35e-06
genus.Allisonella.id.2174	rs6742198	G	A	0.149	0.032	3.35e-06
genus.Allisonella.id.2174	rs10981444	C	A	0.141	0.03	3.26e-06
genus.Allisonella.id.2174	rs3827485	A	G	0.14	0.03	3.24e-06
genus.Allisonella.id.2174	rs12553213	T	G	0.141	0.03	3.04e-06
genus.Allisonella.id.2174	rs1048451	G	A	0.142	0.03	2.93e-06
genus.Allisonella.id.2174	rs4743061	C	T	0.144	0.031	2.91e-06
genus.Allisonella.id.2174	rs60681062	C	T	0.142	0.03	2.89e-06
genus.Allisonella.id.2174	rs13300328	C	G	0.142	0.03	2.72e-06
genus.Allisonella.id.2174	rs13286510	A	T	0.142	0.03	2.66e-06
genus.Allisonella.id.2174	rs4743086	G	T	0.142	0.03	2.34e-06
genus.Allisonella.id.2174	rs16919656	T	G	0.142	0.03	2.24e-06
genus.Allisonella.id.2174	rs12115448	G	A	0.143	0.03	2.2e-06
genus.Allisonella.id.2174	rs7872669	G	C	0.144	0.03	2.15e-06
genus.Allisonella.id.2174	rs12115447	G	A	0.144	0.03	1.96e-06
genus.Allisonella.id.2174	rs6478039	T	C	0.145	0.03	1.83e-06
genus.Allisonella.id.2174	rs6478038	A	C	0.145	0.03	1.83e-06
genus.Allisonella.id.2174	rs10521029	G	T	0.146	0.03	1.59e-06
genus.Allisonella.id.2174	rs4743068	T	C	0.13	0.027	1.53e-06
genus.Allisonella.id.2174	rs62559861	C	G	0.147	0.03	1.41e-06
genus.Allisonella.id.2174	rs35778461	C	T	0.147	0.03	1.21e-06
genus.Allisonella.id.2174	rs785914	T	C	0.158	0.03	3.38e-07
genus.Allisonella.id.2174	rs785907	G	T	0.161	0.03	1.59e-07
genus.Allisonella.id.2174	rs512269	T	C	0.164	0.03	8.9e-08
genus.Allisonella.id.2174	rs785915	G	A	0.165	0.03	8.27e-08
genus.Allisonella.id.2174	rs513301	T	C	0.166	0.03	6.73e-08
genus.Allisonella.id.2174	rs502417	T	C	0.166	0.03	5.71e-08
genus.Allisonella.id.2174	rs785916	A	G	0.167	0.03	5.38e-08
genus.Allisonella.id.2174	rs2480213	A	G	0.167	0.03	4.77e-08
genus.Allisonella.id.2174	rs785928	G	T	0.168	0.03	4.1e-08
genus.Allisonella.id.2174	rs602075	A	G	0.169	0.03	3.57e-08
genus.Alloprevotella.id.961	rs17380632	A	T	0.126	0.028	9.27e-06
genus.Alloprevotella.id.961	rs34619204	G	A	-0.156	0.034	8.84e-06
genus.Alloprevotella.id.961	rs4364940	A	G	0.126	0.028	8.58e-06
genus.Alloprevotella.id.961	rs2154444	T	G	0.138	0.031	8.37e-06
genus.Alloprevotella.id.961	rs58212166	A	G	-0.162	0.036	7.94e-06
genus.Alloprevotella.id.961	rs4680035	A	G	-0.12	0.026	4.99e-06
genus.Alloprevotella.id.961	rs1896135	G	A	0.138	0.029	4.01e-06
genus.Alloprevotella.id.961	rs909327	C	T	0.139	0.029	3.07e-06
genus.Alloprevotella.id.961	rs12675570	C	T	0.155	0.032	3.02e-06
genus.Alloprevotella.id.961	rs7004821	A	G	0.139	0.029	2.67e-06
genus.Alloprevotella.id.961	rs17695059	C	G	0.14	0.029	2.39e-06
genus.Alloprevotella.id.961	rs6472439	C	A	0.141	0.029	2.14e-06
genus.Alloprevotella.id.961	rs12675596	G	T	0.146	0.029	9.64e-07
genus.Anaerofilum.id.2053	rs4244069	G	A	-0.147	0.033	9.81e-06
genus.Anaerofilum.id.2053	rs34258481	A	G	0.089	0.02	9.47e-06
genus.Anaerofilum.id.2053	rs7516037	T	A	0.093	0.021	9.44e-06
genus.Anaerofilum.id.2053	rs34763136	A	G	0.089	0.02	9.39e-06
genus.Anaerofilum.id.2053	rs2487275	A	G	-0.181	0.041	9.24e-06
genus.Anaerofilum.id.2053	rs10483366	T	C	-0.123	0.028	9.11e-06
genus.Anaerofilum.id.2053	rs10744894	G	A	-0.091	0.021	9e-06
genus.Anaerofilum.id.2053	rs1098567	A	G	-0.18	0.041	8.74e-06
genus.Anaerofilum.id.2053	rs1098566	A	G	-0.18	0.041	8.74e-06
genus.Anaerofilum.id.2053	rs13417431	G	A	0.11	0.025	8.66e-06
genus.Anaerofilum.id.2053	rs10802455	G	A	0.093	0.021	8.66e-06
genus.Anaerofilum.id.2053	rs2486027	T	G	-0.182	0.041	8.29e-06
genus.Anaerofilum.id.2053	rs12057312	T	C	0.093	0.021	8.06e-06
genus.Anaerofilum.id.2053	rs9299345	T	C	-0.136	0.03	8.04e-06
genus.Anaerofilum.id.2053	rs59929070	G	A	0.111	0.025	7.97e-06
genus.Anaerofilum.id.2053	rs1767111	A	C	-0.177	0.04	7.61e-06
genus.Anaerofilum.id.2053	rs12466058	C	T	0.091	0.02	7.6e-06
genus.Anaerofilum.id.2053	rs56342910	T	G	0.112	0.025	7.56e-06
genus.Anaerofilum.id.2053	rs12030055	C	T	0.094	0.021	7.53e-06
genus.Anaerofilum.id.2053	rs12030877	C	T	0.094	0.021	7.47e-06
genus.Anaerofilum.id.2053	rs17507421	G	A	0.091	0.02	7.4e-06
genus.Anaerofilum.id.2053	rs7555643	A	G	0.094	0.021	7.27e-06
genus.Anaerofilum.id.2053	rs17012738	T	G	0.09	0.02	7.24e-06
genus.Anaerofilum.id.2053	rs10754535	C	G	0.094	0.021	7.23e-06
genus.Anaerofilum.id.2053	rs356049	G	A	0.133	0.029	6.56e-06
genus.Anaerofilum.id.2053	rs12048664	T	C	0.094	0.021	6.54e-06
genus.Anaerofilum.id.2053	rs1563175	A	C	0.092	0.02	5.54e-06
genus.Anaerofilum.id.2053	rs1552229	A	G	-0.093	0.021	4.72e-06
genus.Anaerofilum.id.2053	rs2054677	T	C	-0.093	0.021	4.44e-06
genus.Anaerofilum.id.2053	rs10802456	G	A	0.098	0.021	4.11e-06
genus.Anaerofilum.id.2053	rs4971306	G	A	0.099	0.021	3.99e-06
genus.Anaerofilum.id.2053	rs784716	A	G	0.096	0.021	3.33e-06
genus.Anaerofilum.id.2053	rs526159	A	G	-0.095	0.021	3.32e-06
genus.Anaerofilum.id.2053	rs784717	A	G	0.096	0.021	3.23e-06
genus.Anaerofilum.id.2053	rs1710914	T	C	-0.177	0.038	3.06e-06
genus.Anaerofilum.id.2053	rs62265649	A	G	0.097	0.021	3.05e-06
genus.Anaerofilum.id.2053	rs17096874	C	T	-0.126	0.027	2.86e-06
genus.Anaerofilum.id.2053	rs62265650	A	G	0.097	0.021	2.74e-06
genus.Anaerofilum.id.2053	rs503294	A	G	-0.096	0.021	2.35e-06
genus.Anaerofilum.id.2053	rs10794359	T	C	-0.095	0.02	2.23e-06
genus.Anaerofilum.id.2053	rs17105491	G	C	-0.193	0.041	1.57e-06
genus.Anaerofilum.id.2053	rs4506496	G	A	0.103	0.021	1.49e-06
genus.Anaerofilum.id.2053	rs1965460	T	C	-0.099	0.021	1.06e-06
genus.Anaerofilum.id.2053	rs712981	A	C	0.101	0.02	6.83e-07
genus.Anaerofilum.id.2053	rs1384873	G	C	-0.112	0.022	3.88e-07
genus.Anaerofilum.id.2053	rs79598899	C	T	0.183	0.036	3.75e-07
genus.Anaerofilum.id.2053	rs816292	T	C	-0.113	0.022	2.64e-07
genus.Anaerostipes.id.1991	rs882172	G	A	0.05	0.011	9.89e-06
genus.Anaerostipes.id.1991	rs11197340	G	C	-0.049	0.011	9.34e-06
genus.Anaerostipes.id.1991	rs11197369	G	A	-0.05	0.011	9.31e-06
genus.Anaerostipes.id.1991	rs2420091	G	A	-0.049	0.011	9.27e-06
genus.Anaerostipes.id.1991	rs11197331	G	A	-0.049	0.011	9.25e-06
genus.Anaerostipes.id.1991	rs11197339	A	G	-0.049	0.011	9.22e-06
genus.Anaerostipes.id.1991	rs11197346	A	C	-0.05	0.011	9.18e-06
genus.Anaerostipes.id.1991	rs2532728	C	A	-0.05	0.011	9.07e-06
genus.Anaerostipes.id.1991	rs2149112	G	A	-0.049	0.011	8.57e-06
genus.Anaerostipes.id.1991	rs1590735	T	G	-0.049	0.011	8.5e-06
genus.Anaerostipes.id.1991	rs1927482	C	T	-0.049	0.011	8.44e-06
genus.Anaerostipes.id.1991	rs10961808	T	C	0.052	0.012	8.11e-06
genus.Anaerostipes.id.1991	rs11197337	T	C	-0.049	0.011	8.07e-06
genus.Anaerostipes.id.1991	rs11197323	T	C	-0.049	0.011	7.97e-06
genus.Anaerostipes.id.1991	rs10502061	A	G	0.084	0.019	7.94e-06
genus.Anaerostipes.id.1991	rs11197321	C	T	-0.049	0.011	7.82e-06
genus.Anaerostipes.id.1991	rs11197345	C	A	-0.05	0.011	7.8e-06
genus.Anaerostipes.id.1991	rs13376554	A	T	0.197	0.046	7.72e-06
genus.Anaerostipes.id.1991	rs1590734	C	G	-0.049	0.011	7.71e-06
genus.Anaerostipes.id.1991	rs11197341	A	G	-0.049	0.011	7.64e-06
genus.Anaerostipes.id.1991	rs2769412	G	A	-0.049	0.011	7.61e-06
genus.Anaerostipes.id.1991	rs11492805	G	A	-0.05	0.011	7.57e-06
genus.Anaerostipes.id.1991	rs1590733	C	T	-0.049	0.011	7.56e-06
genus.Anaerostipes.id.1991	rs11197357	A	C	-0.05	0.011	7.52e-06
genus.Anaerostipes.id.1991	rs11197322	T	C	-0.049	0.011	7.5e-06
genus.Anaerostipes.id.1991	rs34596478	G	A	-0.049	0.011	7.44e-06
genus.Anaerostipes.id.1991	rs10885753	G	T	-0.049	0.011	7.4e-06
genus.Anaerostipes.id.1991	rs11197343	A	G	-0.049	0.011	7.31e-06
genus.Anaerostipes.id.1991	rs11197342	T	C	-0.049	0.011	7.31e-06
genus.Anaerostipes.id.1991	rs10885746	C	A	-0.05	0.011	7.28e-06
genus.Anaerostipes.id.1991	rs72708371	A	G	-0.105	0.024	7.25e-06
genus.Anaerostipes.id.1991	rs11197330	C	T	-0.049	0.011	7.05e-06
genus.Anaerostipes.id.1991	rs1927481	T	C	-0.049	0.011	7.05e-06
genus.Anaerostipes.id.1991	rs2249799	A	G	-0.05	0.011	7.03e-06
genus.Anaerostipes.id.1991	rs11197336	C	T	-0.05	0.011	6.86e-06
genus.Anaerostipes.id.1991	rs2025912	T	G	-0.05	0.011	6.86e-06
genus.Anaerostipes.id.1991	rs10787584	T	C	-0.05	0.011	6.85e-06
genus.Anaerostipes.id.1991	rs6474958	A	G	-0.05	0.011	6.74e-06
genus.Anaerostipes.id.1991	rs2769413	A	C	-0.05	0.011	6.73e-06
genus.Anaerostipes.id.1991	rs35875963	G	A	-0.05	0.011	6.73e-06
genus.Anaerostipes.id.1991	rs2804247	G	A	-0.05	0.011	6.72e-06
genus.Anaerostipes.id.1991	rs7915314	C	T	-0.05	0.011	6.65e-06
genus.Anaerostipes.id.1991	rs4498893	G	A	-0.05	0.011	6.53e-06
genus.Anaerostipes.id.1991	rs12620003	T	C	-0.085	0.019	6.51e-06
genus.Anaerostipes.id.1991	rs10787583	A	G	-0.05	0.011	6.48e-06
genus.Anaerostipes.id.1991	rs1576146	A	G	-0.05	0.011	6.46e-06
genus.Anaerostipes.id.1991	rs2769378	T	C	-0.05	0.011	6.43e-06
genus.Anaerostipes.id.1991	rs1590736	G	A	-0.05	0.011	6.4e-06
genus.Anaerostipes.id.1991	rs10787582	T	C	-0.05	0.011	6.28e-06
genus.Anaerostipes.id.1991	rs10885752	C	A	-0.05	0.011	6.26e-06
genus.Anaerostipes.id.1991	rs11197301	G	A	-0.05	0.011	6.25e-06
genus.Anaerostipes.id.1991	rs10509992	G	A	-0.05	0.011	6.22e-06
genus.Anaerostipes.id.1991	rs11197324	A	G	-0.05	0.011	6.18e-06
genus.Anaerostipes.id.1991	rs2804224	C	G	-0.05	0.011	6.11e-06
genus.Anaerostipes.id.1991	rs7095798	T	C	-0.05	0.011	6.03e-06
genus.Anaerostipes.id.1991	rs2804207	T	C	-0.05	0.011	5.95e-06
genus.Anaerostipes.id.1991	rs11197344	C	A	-0.05	0.011	5.92e-06
genus.Anaerostipes.id.1991	rs6823685	C	A	-0.049	0.011	5.88e-06
genus.Anaerostipes.id.1991	rs7823228	G	C	-0.062	0.014	5.84e-06
genus.Anaerostipes.id.1991	rs3858323	A	G	-0.051	0.011	5.83e-06
genus.Anaerostipes.id.1991	rs11812371	G	C	-0.051	0.011	5.8e-06
genus.Anaerostipes.id.1991	rs2804197	C	T	-0.05	0.011	5.66e-06
genus.Anaerostipes.id.1991	rs1581903	C	T	-0.05	0.011	5.65e-06
genus.Anaerostipes.id.1991	rs2804202	A	T	-0.05	0.011	5.59e-06
genus.Anaerostipes.id.1991	rs1581906	A	T	-0.05	0.011	5.58e-06
genus.Anaerostipes.id.1991	rs2225166	T	C	-0.05	0.011	5.56e-06
genus.Anaerostipes.id.1991	rs11197319	G	T	-0.05	0.011	5.5e-06
genus.Anaerostipes.id.1991	rs2769424	T	C	-0.05	0.011	5.35e-06
genus.Anaerostipes.id.1991	rs78735375	A	C	-0.137	0.031	5.33e-06
genus.Anaerostipes.id.1991	rs2784812	A	G	-0.05	0.011	5.3e-06
genus.Anaerostipes.id.1991	rs1576147	A	G	-0.05	0.011	5.26e-06
genus.Anaerostipes.id.1991	rs2250483	A	C	-0.05	0.011	5.25e-06
genus.Anaerostipes.id.1991	rs176091	T	A	0.074	0.017	5.25e-06
genus.Anaerostipes.id.1991	rs1576144	T	C	-0.05	0.011	5.24e-06
genus.Anaerostipes.id.1991	rs2804206	G	T	-0.05	0.011	5.16e-06
genus.Anaerostipes.id.1991	rs2804198	C	T	-0.05	0.011	5.14e-06
genus.Anaerostipes.id.1991	rs1927480	A	G	-0.05	0.011	5.1e-06
genus.Anaerostipes.id.1991	rs10885747	T	C	-0.051	0.011	5.09e-06
genus.Anaerostipes.id.1991	rs1977454	A	G	-0.05	0.011	5.07e-06
genus.Anaerostipes.id.1991	rs2804201	A	T	-0.05	0.011	5.04e-06
genus.Anaerostipes.id.1991	rs2769401	G	A	-0.05	0.011	5e-06
genus.Anaerostipes.id.1991	rs2769402	T	C	-0.05	0.011	5e-06
genus.Anaerostipes.id.1991	rs2804200	C	G	-0.05	0.011	5e-06
genus.Anaerostipes.id.1991	rs3932552	T	C	-0.05	0.011	4.93e-06
genus.Anaerostipes.id.1991	rs2769409	G	A	-0.05	0.011	4.91e-06
genus.Anaerostipes.id.1991	rs11197299	G	T	-0.051	0.011	4.89e-06
genus.Anaerostipes.id.1991	rs2769408	G	A	-0.05	0.011	4.87e-06
genus.Anaerostipes.id.1991	rs2804209	C	T	-0.05	0.011	4.84e-06
genus.Anaerostipes.id.1991	rs2804205	C	G	-0.05	0.011	4.78e-06
genus.Anaerostipes.id.1991	rs2769405	A	G	-0.05	0.011	4.75e-06
genus.Anaerostipes.id.1991	rs2769375	C	T	-0.05	0.011	4.74e-06
genus.Anaerostipes.id.1991	rs1854243	C	G	-0.05	0.011	4.73e-06
genus.Anaerostipes.id.1991	rs2769403	A	G	-0.05	0.011	4.7e-06
genus.Anaerostipes.id.1991	rs2769397	T	G	-0.05	0.011	4.69e-06
genus.Anaerostipes.id.1991	rs2769396	A	G	-0.05	0.011	4.69e-06
genus.Anaerostipes.id.1991	rs2014785	T	C	0.052	0.011	4.68e-06
genus.Anaerostipes.id.1991	rs7894126	T	C	-0.05	0.011	4.68e-06
genus.Anaerostipes.id.1991	rs1410304	A	G	-0.05	0.011	4.67e-06
genus.Anaerostipes.id.1991	rs2804208	C	T	-0.05	0.011	4.65e-06
genus.Anaerostipes.id.1991	rs2769400	G	A	-0.05	0.011	4.6e-06
genus.Anaerostipes.id.1991	rs2769398	C	A	-0.05	0.011	4.6e-06
genus.Anaerostipes.id.1991	rs2769399	T	A	-0.05	0.011	4.6e-06
genus.Anaerostipes.id.1991	rs1854244	C	T	-0.05	0.011	4.58e-06
genus.Anaerostipes.id.1991	rs2769406	G	A	-0.05	0.011	4.56e-06
genus.Anaerostipes.id.1991	rs2804195	C	A	-0.051	0.011	4.51e-06
genus.Anaerostipes.id.1991	rs2769415	G	A	-0.051	0.011	4.51e-06
genus.Anaerostipes.id.1991	rs1336117	G	C	-0.05	0.011	4.49e-06
genus.Anaerostipes.id.1991	rs10165968	A	G	-0.087	0.019	4.47e-06
genus.Anaerostipes.id.1991	rs60983350	G	A	-0.054	0.012	4.42e-06
genus.Anaerostipes.id.1991	rs2804204	T	G	-0.051	0.011	4.4e-06
genus.Anaerostipes.id.1991	rs2769416	G	A	-0.051	0.011	4.38e-06
genus.Anaerostipes.id.1991	rs7068521	T	C	-0.051	0.011	4.3e-06
genus.Anaerostipes.id.1991	rs11197326	G	A	-0.051	0.011	4.22e-06
genus.Anaerostipes.id.1991	rs2804192	A	G	-0.051	0.011	4.21e-06
genus.Anaerostipes.id.1991	rs3900777	G	A	-0.108	0.024	4.19e-06
genus.Anaerostipes.id.1991	rs2769395	A	T	-0.051	0.011	4.18e-06
genus.Anaerostipes.id.1991	rs2804212	C	G	-0.051	0.011	4.13e-06
genus.Anaerostipes.id.1991	rs2784811	T	C	-0.051	0.011	4.12e-06
genus.Anaerostipes.id.1991	rs1410306	A	G	-0.051	0.011	4.12e-06
genus.Anaerostipes.id.1991	rs4506550	C	G	-0.051	0.011	4.08e-06
genus.Anaerostipes.id.1991	rs11197294	T	C	-0.052	0.011	4.06e-06
genus.Anaerostipes.id.1991	rs1576148	A	G	-0.051	0.011	4.03e-06
genus.Anaerostipes.id.1991	rs10885738	T	A	-0.051	0.011	4.01e-06
genus.Anaerostipes.id.1991	rs2804186	C	T	-0.051	0.011	4e-06
genus.Anaerostipes.id.1991	rs28414370	C	G	-0.052	0.011	3.98e-06
genus.Anaerostipes.id.1991	rs11197320	T	C	-0.051	0.011	3.98e-06
genus.Anaerostipes.id.1991	rs2769394	A	C	-0.051	0.011	3.96e-06
genus.Anaerostipes.id.1991	rs1576149	T	G	-0.051	0.011	3.94e-06
genus.Anaerostipes.id.1991	rs2804187	T	A	-0.051	0.011	3.87e-06
genus.Anaerostipes.id.1991	rs1328008	G	A	-0.051	0.011	3.87e-06
genus.Anaerostipes.id.1991	rs2804214	C	G	-0.051	0.011	3.78e-06
genus.Anaerostipes.id.1991	rs1410305	A	G	-0.051	0.011	3.7e-06
genus.Anaerostipes.id.1991	rs12765024	A	G	-0.051	0.011	3.67e-06
genus.Anaerostipes.id.1991	rs9420197	A	G	-0.051	0.011	3.61e-06
genus.Anaerostipes.id.1991	rs1336116	C	A	-0.052	0.011	3.61e-06
genus.Anaerostipes.id.1991	rs2804190	G	T	-0.051	0.011	3.53e-06
genus.Anaerostipes.id.1991	rs2250761	T	C	-0.051	0.011	3.53e-06
genus.Anaerostipes.id.1991	rs2769371	T	G	-0.051	0.011	3.52e-06
genus.Anaerostipes.id.1991	rs10509991	G	A	-0.052	0.011	3.46e-06
genus.Anaerostipes.id.1991	rs11197325	C	T	-0.051	0.011	3.43e-06
genus.Anaerostipes.id.1991	rs2769391	A	G	-0.051	0.011	3.41e-06
genus.Anaerostipes.id.1991	rs2769388	T	C	-0.051	0.011	3.4e-06
genus.Anaerostipes.id.1991	rs10885750	G	C	-0.051	0.011	3.37e-06
genus.Anaerostipes.id.1991	rs6726833	C	A	-0.088	0.019	3.32e-06
genus.Anaerostipes.id.1991	rs6854026	T	C	-0.051	0.011	3.2e-06
genus.Anaerostipes.id.1991	rs2804213	C	T	-0.051	0.011	3.19e-06
genus.Anaerostipes.id.1991	rs2769392	A	G	-0.051	0.011	3.19e-06
genus.Anaerostipes.id.1991	rs1581904	A	C	-0.051	0.011	3.13e-06
genus.Anaerostipes.id.1991	rs2769393	G	A	-0.051	0.011	3.13e-06
genus.Anaerostipes.id.1991	rs2396460	T	C	-0.051	0.011	2.91e-06
genus.Anaerostipes.id.1991	rs3900776	G	A	-0.11	0.024	2.75e-06
genus.Anaerostipes.id.1991	rs12259535	G	A	-0.052	0.011	2.67e-06
genus.Anaerostipes.id.1991	rs12259533	G	C	-0.052	0.011	2.65e-06
genus.Anaerostipes.id.1991	rs2804244	A	G	-0.053	0.011	2.04e-06
genus.Anaerostipes.id.1991	rs282969	C	T	0.077	0.017	2e-06
genus.Anaerostipes.id.1991	rs62215703	G	A	0.064	0.014	1.98e-06
genus.Anaerostipes.id.1991	rs62157625	T	C	0.089	0.019	1.45e-06
genus.Anaerostipes.id.1991	rs7193624	C	T	0.075	0.015	5.35e-07
genus.Anaerotruncus.id.2054	rs9594214	T	C	0.081	0.019	9.92e-06
genus.Anaerotruncus.id.2054	rs34449434	A	C	-0.05	0.011	9.85e-06
genus.Anaerotruncus.id.2054	rs3915228	C	T	-0.064	0.015	9.83e-06
genus.Anaerotruncus.id.2054	rs6772640	A	G	-0.06	0.014	9.63e-06
genus.Anaerotruncus.id.2054	rs12431415	A	G	0.054	0.012	9.02e-06
genus.Anaerotruncus.id.2054	rs12584670	C	T	0.081	0.019	8.98e-06
genus.Anaerotruncus.id.2054	rs1920392	T	C	-0.063	0.014	8.76e-06
genus.Anaerotruncus.id.2054	rs7637290	A	C	-0.066	0.015	8.71e-06
genus.Anaerotruncus.id.2054	rs9603210	G	A	0.083	0.019	8.63e-06
genus.Anaerotruncus.id.2054	rs17096167	G	A	0.056	0.013	8.46e-06
genus.Anaerotruncus.id.2054	rs9355485	G	C	0.049	0.011	7.65e-06
genus.Anaerotruncus.id.2054	rs7155595	C	A	0.054	0.012	7.55e-06
genus.Anaerotruncus.id.2054	rs17734739	T	C	0.066	0.015	7.43e-06
genus.Anaerotruncus.id.2054	rs1431492	C	T	-0.065	0.015	7.36e-06
genus.Anaerotruncus.id.2054	rs7338422	G	A	0.082	0.019	7.32e-06
genus.Anaerotruncus.id.2054	rs875082	A	T	0.082	0.019	7.31e-06
genus.Anaerotruncus.id.2054	rs7675045	A	T	-0.05	0.011	6.92e-06
genus.Anaerotruncus.id.2054	rs115414803	A	C	-0.144	0.032	6.83e-06
genus.Anaerotruncus.id.2054	rs10150232	A	G	0.057	0.012	6.68e-06
genus.Anaerotruncus.id.2054	rs6494922	A	G	0.09	0.02	6.62e-06
genus.Anaerotruncus.id.2054	rs11018566	A	G	-0.156	0.037	6.14e-06
genus.Anaerotruncus.id.2054	rs12056802	C	G	0.077	0.018	6.13e-06
genus.Anaerotruncus.id.2054	rs12528051	A	T	0.05	0.011	6.1e-06
genus.Anaerotruncus.id.2054	rs8019932	G	T	0.053	0.012	6.01e-06
genus.Anaerotruncus.id.2054	rs2704155	T	A	-0.106	0.023	5.42e-06
genus.Anaerotruncus.id.2054	rs11894866	G	A	0.056	0.012	4.8e-06
genus.Anaerotruncus.id.2054	rs1272208	G	T	-0.061	0.013	4.28e-06
genus.Anaerotruncus.id.2054	rs9347879	T	C	0.051	0.011	4.22e-06
genus.Anaerotruncus.id.2054	rs9603191	A	G	0.074	0.017	4.05e-06
genus.Anaerotruncus.id.2054	rs5010916	T	G	0.074	0.017	3.56e-06
genus.Anaerotruncus.id.2054	rs7147473	G	A	0.054	0.012	3.51e-06
genus.Anaerotruncus.id.2054	rs9594204	T	C	0.074	0.017	3.35e-06
genus.Anaerotruncus.id.2054	rs56098078	C	A	0.074	0.017	3.22e-06
genus.Anaerotruncus.id.2054	rs55903929	G	C	0.075	0.017	2.93e-06
genus.Anaerotruncus.id.2054	rs9594206	A	G	0.075	0.017	2.9e-06
genus.Anaerotruncus.id.2054	rs7335244	G	A	0.075	0.017	2.88e-06
genus.Anaerotruncus.id.2054	rs1575380	T	C	0.075	0.017	2.79e-06
genus.Anaerotruncus.id.2054	rs7334359	T	C	0.075	0.017	2.79e-06
genus.Anaerotruncus.id.2054	rs1575382	A	G	0.075	0.017	2.64e-06
genus.Anaerotruncus.id.2054	rs7140071	C	T	0.075	0.017	2.62e-06
genus.Anaerotruncus.id.2054	rs4421867	C	T	0.075	0.017	2.59e-06
genus.Anaerotruncus.id.2054	rs17055723	T	C	0.075	0.017	2.58e-06
genus.Anaerotruncus.id.2054	rs1923716	A	C	0.075	0.017	2.52e-06
genus.Anaerotruncus.id.2054	rs4435115	A	G	0.075	0.017	2.46e-06
genus.Anaerotruncus.id.2054	rs11841382	G	T	0.084	0.019	2.45e-06
genus.Anaerotruncus.id.2054	rs4575409	T	C	0.075	0.017	2.45e-06
genus.Anaerotruncus.id.2054	rs1575383	G	A	0.075	0.017	2.45e-06
genus.Anaerotruncus.id.2054	rs7989845	G	A	0.075	0.017	2.45e-06
genus.Anaerotruncus.id.2054	rs9603200	A	G	0.075	0.017	2.45e-06
genus.Anaerotruncus.id.2054	rs4669806	G	T	0.058	0.012	2.42e-06
genus.Anaerotruncus.id.2054	rs7994056	C	T	0.075	0.017	2.39e-06
genus.Anaerotruncus.id.2054	rs9594205	A	G	0.075	0.017	2.39e-06
genus.Anaerotruncus.id.2054	rs9805695	C	T	0.075	0.017	2.39e-06
genus.Anaerotruncus.id.2054	rs1575381	T	A	0.075	0.017	2.39e-06
genus.Anaerotruncus.id.2054	rs35078720	G	C	0.076	0.017	2.33e-06
genus.Anaerotruncus.id.2054	rs5000542	A	G	0.076	0.017	2.33e-06
genus.Anaerotruncus.id.2054	rs7329262	G	A	0.076	0.017	2.33e-06
genus.Anaerotruncus.id.2054	rs7988812	A	C	0.076	0.017	2.32e-06
genus.Anaerotruncus.id.2054	rs8005030	C	T	0.055	0.012	2.28e-06
genus.Anaerotruncus.id.2054	rs4514540	T	C	0.076	0.017	2.28e-06
genus.Anaerotruncus.id.2054	rs4578521	T	C	0.076	0.017	2.28e-06
genus.Anaerotruncus.id.2054	rs1923719	C	T	0.076	0.017	2.25e-06
genus.Anaerotruncus.id.2054	rs9603204	T	C	0.076	0.017	2.25e-06
genus.Anaerotruncus.id.2054	rs1590305	T	C	0.076	0.017	2.22e-06
genus.Anaerotruncus.id.2054	rs1590303	A	C	0.076	0.017	2.21e-06
genus.Anaerotruncus.id.2054	rs4436664	C	G	0.076	0.017	2.14e-06
genus.Anaerotruncus.id.2054	rs1923717	T	A	0.076	0.017	2.12e-06
genus.Anaerotruncus.id.2054	rs9594208	C	T	0.076	0.017	2.11e-06
genus.Anaerotruncus.id.2054	rs56406841	A	T	0.076	0.017	2.1e-06
genus.Anaerotruncus.id.2054	rs2224659	G	A	0.076	0.017	2.09e-06
genus.Anaerotruncus.id.2054	rs34027519	T	C	0.076	0.017	2.09e-06
genus.Anaerotruncus.id.2054	rs1923718	T	C	0.076	0.017	2.04e-06
genus.Anaerotruncus.id.2054	rs17055728	G	A	0.076	0.017	2.01e-06
genus.Anaerotruncus.id.2054	rs55963355	T	C	0.076	0.017	2e-06
genus.Anaerotruncus.id.2054	rs9603203	A	G	0.076	0.017	2e-06
genus.Anaerotruncus.id.2054	rs1322804	G	T	0.076	0.017	1.98e-06
genus.Anaerotruncus.id.2054	rs35308611	C	T	0.076	0.017	1.98e-06
genus.Anaerotruncus.id.2054	rs55796046	T	G	0.076	0.017	1.97e-06
genus.Anaerotruncus.id.2054	rs9603202	G	A	0.076	0.017	1.97e-06
genus.Anaerotruncus.id.2054	rs9603201	C	G	0.076	0.017	1.97e-06
genus.Anaerotruncus.id.2054	rs9594209	C	T	0.076	0.017	1.94e-06
genus.Anaerotruncus.id.2054	rs9603195	T	G	0.076	0.017	1.94e-06
genus.Anaerotruncus.id.2054	rs17055747	C	A	0.076	0.017	1.81e-06
genus.Anaerotruncus.id.2054	rs9594207	G	A	0.076	0.017	1.81e-06
genus.Anaerotruncus.id.2054	rs9603205	A	C	0.077	0.017	1.79e-06
genus.Anaerotruncus.id.2054	rs9603209	C	T	0.077	0.017	1.74e-06
genus.Anaerotruncus.id.2054	rs9594211	T	C	0.077	0.017	1.67e-06
genus.Anaerotruncus.id.2054	rs9603208	G	T	0.078	0.017	1.57e-06
genus.Anaerotruncus.id.2054	rs9603207	A	T	0.078	0.017	1.45e-06
genus.Anaerotruncus.id.2054	rs9594210	T	C	0.078	0.017	1.32e-06
genus.Anaerotruncus.id.2054	rs9603206	G	T	0.078	0.017	1.17e-06
genus.Anaerotruncus.id.2054	rs7984882	T	C	0.077	0.016	5.74e-07
genus.Anaerotruncus.id.2054	rs61946576	C	T	0.085	0.018	4.55e-07
genus.Anaerotruncus.id.2054	rs7995332	A	C	0.085	0.018	4.55e-07
genus.Anaerotruncus.id.2054	rs61946592	C	T	0.086	0.018	4.04e-07
genus.Anaerotruncus.id.2054	rs1107244	G	A	0.086	0.018	3.66e-07
genus.Anaerotruncus.id.2054	rs3764077	G	A	0.086	0.018	3.62e-07
genus.Anaerotruncus.id.2054	rs2323487	T	A	0.086	0.018	3.57e-07
genus.Anaerotruncus.id.2054	rs17055871	A	T	0.086	0.018	3.47e-07
genus.Anaerotruncus.id.2054	rs7337526	T	C	0.086	0.018	3.02e-07
genus.Anaerotruncus.id.2054	rs7324216	T	C	0.087	0.018	2.85e-07
genus.Anaerotruncus.id.2054	rs6563551	G	T	0.087	0.018	2.72e-07
genus.Anaerotruncus.id.2054	rs73180681	T	C	0.087	0.018	2.48e-07
genus.Anaerotruncus.id.2054	rs6563550	T	C	0.088	0.018	2.35e-07
genus.Bacteroides.id.918	rs1340392	A	G	-0.058	0.013	9.6e-06
genus.Bacteroides.id.918	rs78280928	A	G	0.057	0.013	8.95e-06
genus.Bacteroides.id.918	rs79325005	G	A	0.057	0.013	8.58e-06
genus.Bacteroides.id.918	rs17788984	G	A	0.075	0.017	8.47e-06
genus.Bacteroides.id.918	rs2366421	T	A	-0.053	0.012	7.65e-06
genus.Bacteroides.id.918	rs13207588	A	G	-0.059	0.013	7.49e-06
genus.Bacteroides.id.918	rs1340391	T	C	-0.059	0.013	6.73e-06
genus.Bacteroides.id.918	rs480694	A	T	-0.059	0.013	6.16e-06
genus.Bacteroides.id.918	rs66710942	C	T	0.049	0.011	5.86e-06
genus.Bacteroides.id.918	rs7322219	C	T	0.052	0.012	5.83e-06
genus.Bacteroides.id.918	rs68118234	C	T	-0.077	0.017	5.65e-06
genus.Bacteroides.id.918	rs79471440	T	G	0.058	0.013	5.24e-06
genus.Bacteroides.id.918	rs6015624	G	A	0.075	0.017	5.21e-06
genus.Bacteroides.id.918	rs2023437	T	C	-0.078	0.017	5.02e-06
genus.Bacteroides.id.918	rs495004	C	G	-0.061	0.013	3.42e-06
genus.Bacteroides.id.918	rs17619981	T	G	0.088	0.019	2.69e-06
genus.Bacteroides.id.918	rs9507307	C	T	0.06	0.013	2.13e-06
genus.Bacteroides.id.918	rs11585893	A	G	-0.074	0.015	1.8e-06
genus.Bacteroides.id.918	rs195028	G	A	0.08	0.017	1.33e-06
genus.Bacteroides.id.918	rs28757219	T	A	0.082	0.017	1.29e-06
genus.Bacteroides.id.918	rs750423	A	G	0.052	0.011	8.89e-07
genus.Bacteroides.id.918	rs66474973	G	T	0.081	0.016	6.81e-07
genus.Bacteroides.id.918	rs6810046	G	A	0.053	0.011	5.56e-07
genus.Bacteroides.id.918	rs6795673	C	T	0.054	0.011	3.38e-07
genus.Barnesiella.id.944	rs28827481	T	C	-0.091	0.021	9.69e-06
genus.Barnesiella.id.944	rs3816345	T	C	0.098	0.021	9.59e-06
genus.Barnesiella.id.944	rs28575468	T	A	-0.081	0.019	9.3e-06
genus.Barnesiella.id.944	rs11155559	T	C	0.096	0.021	8.92e-06
genus.Barnesiella.id.944	rs28483632	C	T	-0.081	0.019	8.84e-06
genus.Barnesiella.id.944	rs28380027	T	C	-0.081	0.019	8.66e-06
genus.Barnesiella.id.944	rs6466817	T	C	-0.054	0.012	8.33e-06
genus.Barnesiella.id.944	rs28479800	A	T	-0.092	0.021	7.93e-06
genus.Barnesiella.id.944	rs113258194	A	G	0.099	0.021	7.31e-06
genus.Barnesiella.id.944	rs4387569	T	A	-0.054	0.012	6.85e-06
genus.Barnesiella.id.944	rs76181748	C	T	-0.078	0.017	6.78e-06
genus.Barnesiella.id.944	rs72684847	T	C	-0.114	0.025	6.76e-06
genus.Barnesiella.id.944	rs28418786	C	G	-0.079	0.017	6.48e-06
genus.Barnesiella.id.944	rs12909713	C	T	-0.055	0.012	4.95e-06
genus.Barnesiella.id.944	rs73216113	A	T	-0.061	0.013	4.54e-06
genus.Barnesiella.id.944	rs62251337	A	G	-0.069	0.015	4.24e-06
genus.Barnesiella.id.944	rs79795328	A	G	-0.082	0.018	4.23e-06
genus.Barnesiella.id.944	rs2057922	G	C	0.092	0.019	3.83e-06
genus.Barnesiella.id.944	rs12674064	A	T	-0.059	0.013	3.56e-06
genus.Barnesiella.id.944	rs77455852	T	G	-0.089	0.02	3.16e-06
genus.Barnesiella.id.944	rs199035	G	A	0.056	0.012	3e-06
genus.Barnesiella.id.944	rs36119320	A	G	0.092	0.019	2.95e-06
genus.Barnesiella.id.944	rs35177866	A	G	0.092	0.019	2.95e-06
genus.Barnesiella.id.944	rs13242616	T	C	-0.058	0.012	2.29e-06
genus.Barnesiella.id.944	rs60316894	C	T	-0.121	0.025	1.19e-06
genus.Barnesiella.id.944	rs2428166	G	A	-0.166	0.034	8.51e-07
genus.Barnesiella.id.944	rs2276875	A	G	-0.07	0.014	4.65e-07
genus.Bifidobacterium.id.436	rs79769806	G	A	-0.081	0.018	9.91e-06
genus.Bifidobacterium.id.436	rs13399952	A	G	0.053	0.012	9.88e-06
genus.Bifidobacterium.id.436	rs62287783	A	G	0.053	0.012	9.79e-06
genus.Bifidobacterium.id.436	rs4908116	T	C	-0.147	0.033	9.77e-06
genus.Bifidobacterium.id.436	rs62287778	C	T	0.053	0.012	9.76e-06
genus.Bifidobacterium.id.436	rs7600925	G	A	0.093	0.02	9.63e-06
genus.Bifidobacterium.id.436	rs73958614	C	A	0.093	0.02	9.36e-06
genus.Bifidobacterium.id.436	rs55912948	G	A	0.054	0.012	9.32e-06
genus.Bifidobacterium.id.436	rs4954559	G	A	0.061	0.014	9.07e-06
genus.Bifidobacterium.id.436	rs78274583	T	C	0.073	0.016	9.03e-06
genus.Bifidobacterium.id.436	rs60253740	T	G	0.073	0.016	9.02e-06
genus.Bifidobacterium.id.436	rs5746486	T	C	-0.054	0.012	9e-06
genus.Bifidobacterium.id.436	rs2164918	G	T	0.09	0.02	8.76e-06
genus.Bifidobacterium.id.436	rs3769018	C	T	0.094	0.02	8.75e-06
genus.Bifidobacterium.id.436	rs7560412	T	C	0.096	0.021	8.7e-06
genus.Bifidobacterium.id.436	rs6728095	T	A	0.053	0.012	8.62e-06
genus.Bifidobacterium.id.436	rs842356	G	A	0.073	0.016	8.51e-06
genus.Bifidobacterium.id.436	rs10193171	A	G	0.053	0.012	8.4e-06
genus.Bifidobacterium.id.436	rs41389446	T	G	-0.082	0.018	8.22e-06
genus.Bifidobacterium.id.436	rs12986776	C	G	0.055	0.012	8.19e-06
genus.Bifidobacterium.id.436	rs17241561	T	G	-0.059	0.013	8.14e-06
genus.Bifidobacterium.id.436	rs35596805	G	A	0.07	0.016	8.1e-06
genus.Bifidobacterium.id.436	rs10928507	A	G	0.053	0.012	8.08e-06
genus.Bifidobacterium.id.436	rs11896918	G	A	0.093	0.02	8.06e-06
genus.Bifidobacterium.id.436	rs2491158	G	A	0.071	0.016	8.05e-06
genus.Bifidobacterium.id.436	rs6894830	T	C	-0.094	0.021	8e-06
genus.Bifidobacterium.id.436	rs12022129	G	A	0.062	0.014	8e-06
genus.Bifidobacterium.id.436	rs4988145	C	A	0.072	0.016	7.85e-06
genus.Bifidobacterium.id.436	rs2686789	A	C	0.071	0.016	7.65e-06
genus.Bifidobacterium.id.436	rs112084119	T	C	0.071	0.016	7.57e-06
genus.Bifidobacterium.id.436	rs2686790	T	C	0.071	0.016	7.5e-06
genus.Bifidobacterium.id.436	rs16832417	T	C	0.074	0.016	7.34e-06
genus.Bifidobacterium.id.436	rs7570283	C	T	0.091	0.02	7.21e-06
genus.Bifidobacterium.id.436	rs6705916	C	T	0.054	0.012	7e-06
genus.Bifidobacterium.id.436	rs3769001	G	A	0.073	0.016	6.92e-06
genus.Bifidobacterium.id.436	rs56100046	A	T	0.074	0.016	6.89e-06
genus.Bifidobacterium.id.436	rs139939202	A	G	0.075	0.016	6.82e-06
genus.Bifidobacterium.id.436	rs55888705	A	G	0.055	0.012	6.67e-06
genus.Bifidobacterium.id.436	rs3739030	A	G	0.053	0.012	6.63e-06
genus.Bifidobacterium.id.436	rs79954860	T	A	0.11	0.025	6.52e-06
genus.Bifidobacterium.id.436	rs10197646	A	G	0.073	0.015	6.44e-06
genus.Bifidobacterium.id.436	rs56302516	T	C	0.061	0.014	6.4e-06
genus.Bifidobacterium.id.436	rs7574366	A	G	0.095	0.02	6.27e-06
genus.Bifidobacterium.id.436	rs12465599	A	G	0.054	0.012	6.27e-06
genus.Bifidobacterium.id.436	rs6746633	A	G	0.096	0.02	6.19e-06
genus.Bifidobacterium.id.436	rs150183636	T	C	0.096	0.02	6.02e-06
genus.Bifidobacterium.id.436	rs309113	A	C	0.071	0.016	5.85e-06
genus.Bifidobacterium.id.436	rs4957061	T	C	0.053	0.012	5.78e-06
genus.Bifidobacterium.id.436	rs6711997	C	T	0.062	0.014	5.61e-06
genus.Bifidobacterium.id.436	rs6713776	G	C	0.073	0.015	5.58e-06
genus.Bifidobacterium.id.436	rs6430594	G	A	0.073	0.016	5.52e-06
genus.Bifidobacterium.id.436	rs72974159	T	C	0.064	0.014	5.5e-06
genus.Bifidobacterium.id.436	rs7582173	A	G	0.074	0.015	5.46e-06
genus.Bifidobacterium.id.436	rs2278682	C	G	0.072	0.016	5.45e-06
genus.Bifidobacterium.id.436	rs4988274	A	T	0.075	0.016	5.42e-06
genus.Bifidobacterium.id.436	rs309157	A	G	0.075	0.016	5.33e-06
genus.Bifidobacterium.id.436	rs3098104	A	T	0.075	0.016	5.25e-06
genus.Bifidobacterium.id.436	rs540489	T	G	-0.064	0.014	5.19e-06
genus.Bifidobacterium.id.436	rs17789633	A	C	0.055	0.012	5.06e-06
genus.Bifidobacterium.id.436	rs1893396	T	G	0.054	0.012	4.95e-06
genus.Bifidobacterium.id.436	rs117761464	A	G	0.231	0.05	4.94e-06
genus.Bifidobacterium.id.436	rs4594504	C	A	0.074	0.016	4.91e-06
genus.Bifidobacterium.id.436	rs309154	T	C	0.075	0.016	4.88e-06
genus.Bifidobacterium.id.436	rs861392	C	T	0.055	0.012	4.87e-06
genus.Bifidobacterium.id.436	rs75344046	C	T	0.232	0.051	4.86e-06
genus.Bifidobacterium.id.436	rs1435577	G	C	0.074	0.016	4.74e-06
genus.Bifidobacterium.id.436	rs3099429	A	T	0.073	0.016	4.73e-06
genus.Bifidobacterium.id.436	rs10171371	C	T	0.055	0.012	4.63e-06
genus.Bifidobacterium.id.436	rs6707326	G	A	0.055	0.012	4.56e-06
genus.Bifidobacterium.id.436	rs10180515	A	T	0.063	0.014	4.53e-06
genus.Bifidobacterium.id.436	rs11684458	G	A	0.063	0.014	4.5e-06
genus.Bifidobacterium.id.436	rs842359	C	G	0.055	0.012	4.48e-06
genus.Bifidobacterium.id.436	rs73797465	T	G	-0.095	0.021	4.38e-06
genus.Bifidobacterium.id.436	rs2176716	T	C	0.063	0.014	4.36e-06
genus.Bifidobacterium.id.436	rs111837148	A	G	0.074	0.016	4.32e-06
genus.Bifidobacterium.id.436	rs75524146	T	C	0.076	0.016	4.26e-06
genus.Bifidobacterium.id.436	rs13387501	T	C	0.063	0.014	4.25e-06
genus.Bifidobacterium.id.436	rs6430545	A	T	0.054	0.012	4.24e-06
genus.Bifidobacterium.id.436	rs4954558	G	A	0.063	0.014	4.24e-06
genus.Bifidobacterium.id.436	rs2090660	T	C	0.064	0.014	4.13e-06
genus.Bifidobacterium.id.436	rs7561565	G	T	0.074	0.016	4.09e-06
genus.Bifidobacterium.id.436	rs13020688	G	A	0.056	0.012	4.07e-06
genus.Bifidobacterium.id.436	rs76671854	C	G	-0.085	0.018	3.96e-06
genus.Bifidobacterium.id.436	rs503227	C	T	0.074	0.016	3.91e-06
genus.Bifidobacterium.id.436	rs61253125	C	T	0.074	0.016	3.89e-06
genus.Bifidobacterium.id.436	rs55809728	A	G	0.104	0.023	3.86e-06
genus.Bifidobacterium.id.436	rs4954556	A	G	0.117	0.026	3.85e-06
genus.Bifidobacterium.id.436	rs4988163	T	G	0.075	0.016	3.82e-06
genus.Bifidobacterium.id.436	rs4954189	A	G	0.055	0.012	3.75e-06
genus.Bifidobacterium.id.436	rs56230617	A	G	0.071	0.016	3.68e-06
genus.Bifidobacterium.id.436	rs4988201	G	A	0.075	0.016	3.63e-06
genus.Bifidobacterium.id.436	rs79176913	A	C	0.074	0.016	3.62e-06
genus.Bifidobacterium.id.436	rs7581814	G	C	0.074	0.016	3.59e-06
genus.Bifidobacterium.id.436	rs857444	C	T	0.056	0.012	3.57e-06
genus.Bifidobacterium.id.436	rs13410301	C	T	0.056	0.012	3.56e-06
genus.Bifidobacterium.id.436	rs6755391	T	C	0.084	0.018	3.51e-06
genus.Bifidobacterium.id.436	rs309150	A	T	0.074	0.016	3.49e-06
genus.Bifidobacterium.id.436	rs16831899	A	G	0.084	0.018	3.46e-06
genus.Bifidobacterium.id.436	rs3099428	G	C	0.073	0.016	3.37e-06
genus.Bifidobacterium.id.436	rs4954187	T	C	0.055	0.012	3.37e-06
genus.Bifidobacterium.id.436	rs60902646	C	T	0.095	0.02	3.34e-06
genus.Bifidobacterium.id.436	rs3099427	G	A	0.073	0.016	3.32e-06
genus.Bifidobacterium.id.436	rs60241067	T	A	0.063	0.013	3.3e-06
genus.Bifidobacterium.id.436	rs309162	A	T	0.074	0.016	3.28e-06
genus.Bifidobacterium.id.436	rs309172	G	A	0.072	0.016	3.23e-06
genus.Bifidobacterium.id.436	rs6710892	A	G	0.084	0.018	3.21e-06
genus.Bifidobacterium.id.436	rs6712127	G	A	0.071	0.015	3.11e-06
genus.Bifidobacterium.id.436	rs78364332	C	T	0.075	0.016	3.06e-06
genus.Bifidobacterium.id.436	rs614193	T	A	0.074	0.016	3.05e-06
genus.Bifidobacterium.id.436	rs3112496	T	C	0.073	0.016	3.02e-06
genus.Bifidobacterium.id.436	rs3087343	G	T	0.075	0.016	3e-06
genus.Bifidobacterium.id.436	rs3098102	T	C	0.074	0.016	2.95e-06
genus.Bifidobacterium.id.436	rs6750549	G	A	0.076	0.016	2.94e-06
genus.Bifidobacterium.id.436	rs16832624	C	T	0.064	0.014	2.85e-06
genus.Bifidobacterium.id.436	rs1057031	A	G	0.075	0.016	2.83e-06
genus.Bifidobacterium.id.436	rs75128007	G	A	0.065	0.014	2.81e-06
genus.Bifidobacterium.id.436	rs16832162	A	T	0.075	0.016	2.79e-06
genus.Bifidobacterium.id.436	rs30917I	C	G	0.075	0.016	2.76e-06
genus.Bifidobacterium.id.436	rs4954218	G	T	-0.061	0.014	2.72e-06
genus.Bifidobacterium.id.436	rs309167	T	C	0.077	0.016	2.7e-06
genus.Bifidobacterium.id.436	rs2839740	T	G	0.077	0.016	2.7e-06
genus.Bifidobacterium.id.436	rs586964	A	G	0.077	0.016	2.69e-06
genus.Bifidobacterium.id.436	rs77985886	T	C	0.098	0.02	2.68e-06
genus.Bifidobacterium.id.436	rs309166	T	C	0.074	0.016	2.67e-06
genus.Bifidobacterium.id.436	rs80261410	C	T	0.065	0.014	2.66e-06
genus.Bifidobacterium.id.436	rs895285	G	A	0.077	0.016	2.65e-06
genus.Bifidobacterium.id.436	rs12472293	C	T	0.075	0.016	2.62e-06
genus.Bifidobacterium.id.436	rs1942051	G	A	0.055	0.012	2.59e-06
genus.Bifidobacterium.id.436	rs113974791	G	T	0.075	0.016	2.54e-06
genus.Bifidobacterium.id.436	rs766271	T	C	0.056	0.012	2.52e-06
genus.Bifidobacterium.id.436	rs56108664	T	C	0.073	0.016	2.44e-06
genus.Bifidobacterium.id.436	rs10928519	T	C	0.056	0.012	2.42e-06
genus.Bifidobacterium.id.436	rs77096272	A	C	0.078	0.016	2.42e-06
genus.Bifidobacterium.id.436	rs309142	C	T	0.073	0.015	2.42e-06
genus.Bifidobacterium.id.436	rs309120	C	G	0.074	0.016	2.38e-06
genus.Bifidobacterium.id.436	rs12464050	T	G	0.078	0.016	2.36e-06
genus.Bifidobacterium.id.436	rs75753154	C	T	0.076	0.016	2.36e-06
genus.Bifidobacterium.id.436	rs499483	A	G	0.078	0.016	2.33e-06
genus.Bifidobacterium.id.436	rs7588568	A	C	-0.062	0.013	2.32e-06
genus.Bifidobacterium.id.436	rs3098103	C	T	0.078	0.016	2.28e-06
genus.Bifidobacterium.id.436	rs112758679	C	A	0.076	0.016	2.25e-06
genus.Bifidobacterium.id.436	rs7575241	A	C	0.072	0.015	2.25e-06
genus.Bifidobacterium.id.436	rs13424016	A	G	0.057	0.012	2.21e-06
genus.Bifidobacterium.id.436	rs7606267	C	T	0.076	0.016	2.19e-06
genus.Bifidobacterium.id.436	rs7573555	C	T	0.076	0.016	2.18e-06
genus.Bifidobacterium.id.436	rs62181700	G	A	-0.062	0.013	2.17e-06
genus.Bifidobacterium.id.436	rs309159	T	C	0.076	0.016	2.15e-06
genus.Bifidobacterium.id.436	rs6728946	G	C	0.076	0.016	2.13e-06
genus.Bifidobacterium.id.436	rs59213715	C	A	0.078	0.016	2.12e-06
genus.Bifidobacterium.id.436	rs73958638	G	A	0.114	0.024	2.12e-06
genus.Bifidobacterium.id.436	rs72976292	A	T	0.06	0.013	2.11e-06
genus.Bifidobacterium.id.436	rs10174462	G	C	0.073	0.015	2.09e-06
genus.Bifidobacterium.id.436	rs10432371	A	G	0.056	0.012	2.07e-06
genus.Bifidobacterium.id.436	rs660002	T	C	0.074	0.015	2.04e-06
genus.Bifidobacterium.id.436	rs4245838	T	C	0.11	0.024	1.98e-06
genus.Bifidobacterium.id.436	rs7556781	G	A	0.071	0.014	1.98e-06
genus.Bifidobacterium.id.436	rs1592	C	A	0.057	0.012	1.96e-06
genus.Bifidobacterium.id.436	rs512375	G	T	-0.058	0.012	1.96e-06
genus.Bifidobacterium.id.436	rs4567981	T	A	0.056	0.012	1.93e-06
genus.Bifidobacterium.id.436	rs1992764	T	C	0.057	0.012	1.9e-06
genus.Bifidobacterium.id.436	rs59869505	C	A	0.061	0.013	1.9e-06
genus.Bifidobacterium.id.436	rs309165	C	T	0.074	0.015	1.88e-06
genus.Bifidobacterium.id.436	rs1960171	T	C	0.063	0.013	1.87e-06
genus.Bifidobacterium.id.436	rs13415439	A	C	0.061	0.013	1.86e-06
genus.Bifidobacterium.id.436	rs6743537	A	G	0.078	0.016	1.86e-06
genus.Bifidobacterium.id.436	rs2289963	A	G	0.1	0.02	1.85e-06
genus.Bifidobacterium.id.436	rs7560535	A	G	0.091	0.019	1.76e-06
genus.Bifidobacterium.id.436	rs309170	T	C	0.076	0.016	1.7e-06
genus.Bifidobacterium.id.436	rs79826902	A	G	0.079	0.016	1.7e-06
genus.Bifidobacterium.id.436	rs11688414	G	A	0.057	0.012	1.7e-06
genus.Bifidobacterium.id.436	rs16832205	A	G	0.079	0.016	1.68e-06
genus.Bifidobacterium.id.436	rs4954555	C	T	0.111	0.024	1.66e-06
genus.Bifidobacterium.id.436	rs10841473	G	C	-0.062	0.013	1.65e-06
genus.Bifidobacterium.id.436	rs309118	C	G	0.075	0.015	1.63e-06
genus.Bifidobacterium.id.436	rs177917	G	A	0.075	0.016	1.62e-06
genus.Bifidobacterium.id.436	rs7568884	T	C	0.061	0.013	1.62e-06
genus.Bifidobacterium.id.436	rs7592990	G	A	0.085	0.018	1.61e-06
genus.Bifidobacterium.id.436	rs16833170	G	A	0.061	0.013	1.6e-06
genus.Bifidobacterium.id.436	rs41269821	G	A	0.077	0.016	1.6e-06
genus.Bifidobacterium.id.436	rs4954571	A	G	0.064	0.014	1.58e-06
genus.Bifidobacterium.id.436	rs309161	A	G	0.076	0.016	1.58e-06
genus.Bifidobacterium.id.436	rs2117511	C	T	0.085	0.017	1.54e-06
genus.Bifidobacterium.id.436	rs111682961	T	C	0.08	0.016	1.54e-06
genus.Bifidobacterium.id.436	rs7589832	C	A	0.073	0.015	1.5e-06
genus.Bifidobacterium.id.436	rs309119	C	T	0.076	0.016	1.49e-06
genus.Bifidobacterium.id.436	rs1879087	C	T	0.105	0.024	1.45e-06
genus.Bifidobacterium.id.436	rs112396243	T	C	0.08	0.016	1.45e-06
genus.Bifidobacterium.id.436	rs73958618	G	A	0.072	0.015	1.43e-06
genus.Bifidobacterium.id.436	rs6711493	G	A	0.075	0.015	1.4e-06
genus.Bifidobacterium.id.436	rs16832243	T	C	0.08	0.016	1.4e-06
genus.Bifidobacterium.id.436	rs7593370	T	C	0.057	0.012	1.38e-06
genus.Bifidobacterium.id.436	rs4988243	C	T	0.114	0.024	1.37e-06
genus.Bifidobacterium.id.436	rs309158	G	A	0.075	0.015	1.35e-06
genus.Bifidobacterium.id.436	rs57243841	G	A	0.068	0.014	1.34e-06
genus.Bifidobacterium.id.436	rs606101	A	G	-0.06	0.012	1.29e-06
genus.Bifidobacterium.id.436	rs10496738	T	C	0.081	0.016	1.22e-06
genus.Bifidobacterium.id.436	rs2053726	G	A	0.057	0.012	1.21e-06
genus.Bifidobacterium.id.436	rs7604460	C	T	0.081	0.016	1.21e-06
genus.Bifidobacterium.id.436	rs12469411	T	C	0.057	0.012	1.17e-06
genus.Bifidobacterium.id.436	rs721765	A	C	0.081	0.016	1.16e-06
genus.Bifidobacterium.id.436	rs12474975	T	A	0.08	0.016	1.15e-06
genus.Bifidobacterium.id.436	rs6430585	A	C	0.073	0.015	1.15e-06
genus.Bifidobacterium.id.436	rs4954575	A	G	0.062	0.013	1.14e-06
genus.Bifidobacterium.id.436	rs3814358	C	A	0.057	0.012	1.13e-06
genus.Bifidobacterium.id.436	rs1374291	C	T	0.058	0.012	1.13e-06
genus.Bifidobacterium.id.436	rs62168891	T	C	0.058	0.012	1.12e-06
genus.Bifidobacterium.id.436	rs75667274	T	C	0.081	0.016	1.11e-06
genus.Bifidobacterium.id.436	rs6430601	T	G	0.08	0.017	1.09e-06
genus.Bifidobacterium.id.436	rs625118	A	C	0.086	0.018	1.09e-06
genus.Bifidobacterium.id.436	rs6430549	G	A	0.057	0.012	1.08e-06
genus.Bifidobacterium.id.436	rs147616090	T	C	0.074	0.015	1.05e-06
genus.Bifidobacterium.id.436	rs4954191	G	C	0.057	0.012	1.05e-06
genus.Bifidobacterium.id.436	rs115553816	A	G	0.081	0.016	1.05e-06
genus.Bifidobacterium.id.436	rs11895609	T	A	0.079	0.017	1.03e-06
genus.Bifidobacterium.id.436	rs309152	C	T	0.078	0.016	1.01e-06
genus.Bifidobacterium.id.436	rs669759	C	T	-0.059	0.012	1e-06
genus.Bifidobacterium.id.436	rs1446523	A	G	0.058	0.012	9.99e-07
genus.Bifidobacterium.id.436	rs2053727	T	C	0.058	0.012	9.9e-07
genus.Bifidobacterium.id.436	rs78793148	A	C	0.099	0.02	9.44e-07
genus.Bifidobacterium.id.436	rs2197579	T	C	0.058	0.012	9.35e-07
genus.Bifidobacterium.id.436	rs6430555	C	A	0.058	0.012	8.75e-07
genus.Bifidobacterium.id.436	rs3820790	T	A	0.095	0.019	8.74e-07
genus.Bifidobacterium.id.436	rs112407062	T	C	0.081	0.016	8.7e-07
genus.Bifidobacterium.id.436	rs72847650	A	C	-0.06	0.012	8.44e-07
genus.Bifidobacterium.id.436	rs4954196	G	A	0.058	0.012	8.34e-07
genus.Bifidobacterium.id.436	rs6708957	T	C	0.074	0.015	8.24e-07
genus.Bifidobacterium.id.436	rs4954272	G	A	0.087	0.018	8.24e-07
genus.Bifidobacterium.id.436	rs621341	T	C	-0.06	0.012	8.2e-07
genus.Bifidobacterium.id.436	rs12476127	G	A	0.08	0.016	8.06e-07
genus.Bifidobacterium.id.436	rs479980	C	A	-0.06	0.012	8.05e-07
genus.Bifidobacterium.id.436	rs4954394	G	A	0.066	0.014	7.84e-07
genus.Bifidobacterium.id.436	rs12471781	A	G	0.083	0.016	7.76e-07
genus.Bifidobacterium.id.436	rs1374292	A	G	0.058	0.012	7.72e-07
genus.Bifidobacterium.id.436	rs62168872	T	C	0.058	0.012	7.69e-07
genus.Bifidobacterium.id.436	rs766270	C	G	0.059	0.012	7.4e-07
genus.Bifidobacterium.id.436	rs12469941	T	C	0.058	0.012	7.33e-07
genus.Bifidobacterium.id.436	rs2166480	A	G	0.059	0.012	7.28e-07
genus.Bifidobacterium.id.436	rs6430550	T	C	0.058	0.012	7.13e-07
genus.Bifidobacterium.id.436	rs4954197	A	G	0.059	0.012	7.07e-07
genus.Bifidobacterium.id.436	rs12469551	T	G	0.075	0.015	7.06e-07
genus.Bifidobacterium.id.436	rs7595712	T	C	0.075	0.015	6.95e-07
genus.Bifidobacterium.id.436	rs6430554	T	C	0.059	0.012	6.89e-07
genus.Bifidobacterium.id.436	rs1469995	A	G	0.075	0.015	6.84e-07
genus.Bifidobacterium.id.436	rs16832440	A	G	0.083	0.016	6.68e-07
genus.Bifidobacterium.id.436	rs60453613	C	G	0.075	0.015	6.64e-07
genus.Bifidobacterium.id.436	rs80274970	T	C	0.104	0.021	6.53e-07
genus.Bifidobacterium.id.436	rs6732236	G	T	0.075	0.015	6.53e-07
genus.Bifidobacterium.id.436	rs60274701	A	G	0.094	0.019	6.43e-07
genus.Bifidobacterium.id.436	rs309123	G	C	0.078	0.016	6.42e-07
genus.Bifidobacterium.id.436	rs62168871	G	A	0.059	0.012	6.42e-07
genus.Bifidobacterium.id.436	rs10176573	A	C	0.059	0.012	6.24e-07
genus.Bifidobacterium.id.436	rs1446525	A	G	0.059	0.012	6.24e-07
genus.Bifidobacterium.id.436	rs7589297	A	C	0.059	0.012	6.14e-07
genus.Bifidobacterium.id.436	rs6430551	C	T	0.059	0.012	6.04e-07
genus.Bifidobacterium.id.436	rs6706537	C	T	0.059	0.012	5.98e-07
genus.Bifidobacterium.id.436	rs10928522	A	C	0.059	0.012	5.82e-07
genus.Bifidobacterium.id.436	rs12992815	G	C	0.094	0.019	5.79e-07
genus.Bifidobacterium.id.436	rs309133	C	A	0.079	0.016	5.74e-07
genus.Bifidobacterium.id.436	rs4954193	G	A	0.059	0.012	5.68e-07
genus.Bifidobacterium.id.436	rs1348790	G	C	0.059	0.012	5.57e-07
genus.Bifidobacterium.id.436	rs1469996	G	A	0.076	0.015	5.53e-07
genus.Bifidobacterium.id.436	rs6733547	T	G	0.083	0.017	5.1e-07
genus.Bifidobacterium.id.436	rs2322251	T	C	0.06	0.012	4.94e-07
genus.Bifidobacterium.id.436	rs60963894	G	T	0.076	0.015	4.86e-07
genus.Bifidobacterium.id.436	rs6716987	A	C	0.064	0.013	4.77e-07
genus.Bifidobacterium.id.436	rs1446524	G	A	0.059	0.012	4.75e-07
genus.Bifidobacterium.id.436	rs10496737	G	A	0.076	0.015	4.65e-07
genus.Bifidobacterium.id.436	rs1865452	T	C	0.076	0.015	4.63e-07
genus.Bifidobacterium.id.436	rs520449	C	T	-0.061	0.012	4.54e-07
genus.Bifidobacterium.id.436	rs1374287	T	C	0.06	0.012	4.31e-07
genus.Bifidobacterium.id.436	rs1374288	T	C	0.06	0.012	4.3e-07
genus.Bifidobacterium.id.436	rs10928523	T	C	0.06	0.012	4.18e-07
genus.Bifidobacterium.id.436	rs872151	T	C	0.094	0.019	4.14e-07
genus.Bifidobacterium.id.436	rs1964459	G	C	0.084	0.016	4.08e-07
genus.Bifidobacterium.id.436	rs9677760	T	A	0.076	0.015	4.01e-07
genus.Bifidobacterium.id.436	rs1374289	T	C	0.06	0.012	3.66e-07
genus.Bifidobacterium.id.436	rs3739022	A	G	0.096	0.019	3.6e-07
genus.Bifidobacterium.id.436	rs6733130	C	A	0.06	0.012	3.57e-07
genus.Bifidobacterium.id.436	rs1961273	C	T	0.067	0.013	3.51e-07
genus.Bifidobacterium.id.436	rs309122	G	A	0.08	0.015	3.35e-07
genus.Bifidobacterium.id.436	rs56036623	C	T	0.07	0.014	3.31e-07
genus.Bifidobacterium.id.436	rs4954557	T	C	0.067	0.013	3.06e-07
genus.Bifidobacterium.id.436	rs62168844	G	A	0.102	0.02	2.87e-07
genus.Bifidobacterium.id.436	rs309124	G	A	0.08	0.015	2.73e-07
genus.Bifidobacterium.id.436	rs4953938	A	G	0.061	0.012	2.71e-07
genus.Bifidobacterium.id.436	rs4954573	G	T	0.066	0.013	2.65e-07
genus.Bifidobacterium.id.436	rs4954445	A	T	0.099	0.019	2.46e-07
genus.Bifidobacterium.id.436	rs10928558	C	T	0.066	0.013	2.39e-07
genus.Bifidobacterium.id.436	rs10187990	G	A	0.061	0.012	2.37e-07
genus.Bifidobacterium.id.436	rs1947112	G	A	0.061	0.012	2.35e-07
genus.Bifidobacterium.id.436	rs1519525	T	C	0.066	0.013	2.32e-07
genus.Bifidobacterium.id.436	rs10193587	C	T	0.067	0.013	2.24e-07
genus.Bifidobacterium.id.436	rs7564577	T	C	0.086	0.017	2.19e-07
genus.Bifidobacterium.id.436	rs3769023	A	G	0.062	0.012	2.16e-07
genus.Bifidobacterium.id.436	rs61470941	C	T	0.098	0.019	2.13e-07
genus.Bifidobacterium.id.436	rs3769011	T	A	0.099	0.019	2.08e-07
genus.Bifidobacterium.id.436	rs2322812	G	A	0.099	0.019	2e-07
genus.Bifidobacterium.id.436	rs74697610	T	A	0.109	0.021	2e-07
genus.Bifidobacterium.id.436	rs56271357	T	C	0.062	0.012	1.87e-07
genus.Bifidobacterium.id.436	rs58080116	G	A	0.1	0.019	1.81e-07
genus.Bifidobacterium.id.436	rs2090661	G	A	0.068	0.013	1.8e-07
genus.Bifidobacterium.id.436	rs3814355	T	C	0.062	0.012	1.79e-07
genus.Bifidobacterium.id.436	rs3814354	A	G	0.062	0.012	1.79e-07
genus.Bifidobacterium.id.436	rs13010498	C	G	-0.066	0.013	1.78e-07
genus.Bifidobacterium.id.436	rs10166142	G	A	0.062	0.012	1.76e-07
genus.Bifidobacterium.id.436	rs2034261	T	G	0.062	0.012	1.72e-07
genus.Bifidobacterium.id.436	rs1807356	C	T	0.089	0.017	1.72e-07
genus.Bifidobacterium.id.436	rs4954578	C	T	0.067	0.013	1.63e-07
genus.Bifidobacterium.id.436	rs62168897	T	C	0.062	0.012	1.56e-07
genus.Bifidobacterium.id.436	rs62168846	A	G	0.106	0.02	1.47e-07
genus.Bifidobacterium.id.436	rs62168843	C	T	0.105	0.02	1.43e-07
genus.Bifidobacterium.id.436	rs1964776	T	C	0.067	0.013	1.38e-07
genus.Bifidobacterium.id.436	rs62168847	C	T	0.105	0.02	1.34e-07
genus.Bifidobacterium.id.436	rs16833335	A	G	0.067	0.013	1.29e-07
genus.Bifidobacterium.id.436	rs2874874	C	A	0.101	0.019	1.27e-07
genus.Bifidobacterium.id.436	rs1123848	T	C	0.067	0.013	1.24e-07
genus.Bifidobacterium.id.436	rs6708336	A	T	0.063	0.012	1.2e-07
genus.Bifidobacterium.id.436	rs578384	T	C	-0.064	0.012	1.19e-07
genus.Bifidobacterium.id.436	rs60376570	A	G	0.101	0.019	1.09e-07
genus.Bifidobacterium.id.436	rs4954577	G	A	0.068	0.013	1.08e-07
genus.Bifidobacterium.id.436	rs56211644	C	T	0.102	0.019	1.07e-07
genus.Bifidobacterium.id.436	rs10928554	T	C	0.102	0.018	1.03e-07
genus.Bifidobacterium.id.436	rs4954397	G	A	0.068	0.013	1e-07
genus.Bifidobacterium.id.436	rs638382	T	C	-0.065	0.012	9.45e-08
genus.Bifidobacterium.id.436	rs13007153	C	T	0.07	0.013	9.07e-08
genus.Bifidobacterium.id.436	rs584226	C	T	0.097	0.018	8.88e-08
genus.Bifidobacterium.id.436	rs35215526	A	G	0.108	0.02	8.84e-08
genus.Bifidobacterium.id.436	rs12473760	A	C	0.068	0.013	8.67e-08
genus.Bifidobacterium.id.436	rs35564151	G	A	0.064	0.012	8.56e-08
genus.Bifidobacterium.id.436	rs6430580	G	A	0.092	0.018	8.04e-08
genus.Bifidobacterium.id.436	rs57543738	C	T	0.103	0.019	6.87e-08
genus.Bifidobacterium.id.436	rs7609188	C	G	0.115	0.022	6.86e-08
genus.Bifidobacterium.id.436	rs4954388	C	T	0.071	0.013	6.05e-08
genus.Bifidobacterium.id.436	rs2056297	T	G	0.069	0.013	6.04e-08
genus.Bifidobacterium.id.436	rs78141345	A	G	0.104	0.019	5.92e-08
genus.Bifidobacterium.id.436	rs4954570	C	G	0.073	0.014	5.73e-08
genus.Bifidobacterium.id.436	rs2102896	C	T	0.069	0.013	5.49e-08
genus.Bifidobacterium.id.436	rs16855656	G	A	0.095	0.017	5.47e-08
genus.Bifidobacterium.id.436	rs953387	C	A	0.069	0.013	5.45e-08
genus.Bifidobacterium.id.436	rs7565871	C	G	0.086	0.017	5.37e-08
genus.Bifidobacterium.id.436	rs10803550	T	C	0.069	0.013	4.8e-08
genus.Bifidobacterium.id.436	rs13008147	G	A	-0.07	0.014	4.7e-08
genus.Bifidobacterium.id.436	rs55634455	C	T	0.105	0.019	4.66e-08
genus.Bifidobacterium.id.436	rs6756200	C	T	0.065	0.012	4.63e-08
genus.Bifidobacterium.id.436	rs16831994	C	T	0.117	0.022	4.59e-08
genus.Bifidobacterium.id.436	rs4954396	C	A	0.069	0.013	4.57e-08
genus.Bifidobacterium.id.436	rs4954572	T	G	0.069	0.013	4.55e-08
genus.Bifidobacterium.id.436	rs6729961	G	T	0.12	0.022	3.87e-08
genus.Bifidobacterium.id.436	rs950176	G	A	0.07	0.013	3.7e-08
genus.Bifidobacterium.id.436	rs12478902	C	T	0.099	0.018	3.69e-08
genus.Bifidobacterium.id.436	rs4954566	T	C	0.07	0.013	3.69e-08
genus.Bifidobacterium.id.436	rs309132	G	C	0.102	0.018	3.68e-08
genus.Bifidobacterium.id.436	rs4954564	G	A	0.07	0.013	3.58e-08
genus.Bifidobacterium.id.436	rs6707289	G	A	0.12	0.022	3.55e-08
genus.Bifidobacterium.id.436	rs6720497	A	G	0.12	0.022	3.55e-08
genus.Bifidobacterium.id.436	rs12616955	T	C	0.07	0.013	3.48e-08
genus.Bifidobacterium.id.436	rs10171677	A	G	0.065	0.012	3.28e-08
genus.Bifidobacterium.id.436	rs4954569	T	C	0.07	0.013	3.15e-08
genus.Bifidobacterium.id.436	rs2164331	T	C	0.103	0.018	3.12e-08
genus.Bifidobacterium.id.436	rs72970286	G	T	0.117	0.021	3.01e-08
genus.Bifidobacterium.id.436	rs4954392	G	A	0.07	0.013	2.94e-08
genus.Bifidobacterium.id.436	rs3754690	T	C	0.107	0.019	2.92e-08
genus.Bifidobacterium.id.436	rs6745996	G	A	0.096	0.018	2.7e-08
genus.Bifidobacterium.id.436	rs6715785	A	G	0.07	0.013	2.69e-08
genus.Bifidobacterium.id.436	rs16832200	C	T	0.099	0.018	2.68e-08
genus.Bifidobacterium.id.436	rs1942055	C	G	0.067	0.012	2.48e-08
genus.Bifidobacterium.id.436	rs12233092	A	G	0.1	0.018	2.4e-08
genus.Bifidobacterium.id.436	rs6727889	T	C	0.092	0.017	2.37e-08
genus.Bifidobacterium.id.436	rs7594509	T	G	0.089	0.017	2.26e-08
genus.Bifidobacterium.id.436	rs72972104	A	G	0.118	0.022	2.26e-08
genus.Bifidobacterium.id.436	rs56067372	T	C	0.105	0.018	2.23e-08
genus.Bifidobacterium.id.436	rs62170081	G	A	0.121	0.022	2.14e-08
genus.Bifidobacterium.id.436	rs56982689	T	C	0.119	0.022	2.13e-08
genus.Bifidobacterium.id.436	rs74266324	A	G	0.085	0.015	2.13e-08
genus.Bifidobacterium.id.436	rs6705610	G	T	0.089	0.017	2.02e-08
genus.Bifidobacterium.id.436	rs11897217	T	C	0.089	0.017	1.98e-08
genus.Bifidobacterium.id.436	rs6752519	T	C	0.104	0.018	1.78e-08
genus.Bifidobacterium.id.436	rs6430593	A	G	0.101	0.018	1.74e-08
genus.Bifidobacterium.id.436	rs4954430	T	C	0.121	0.022	1.7e-08
genus.Bifidobacterium.id.436	rs2322445	A	T	0.09	0.017	1.66e-08
genus.Bifidobacterium.id.436	rs4954633	T	C	0.12	0.022	1.6e-08
genus.Bifidobacterium.id.436	rs2322725	C	T	0.1	0.018	1.52e-08
genus.Bifidobacterium.id.436	rs7565053	T	A	0.128	0.023	1.48e-08
genus.Bifidobacterium.id.436	rs16832138	A	G	0.106	0.018	1.47e-08
genus.Bifidobacterium.id.436	rs7608980	A	G	0.106	0.018	1.42e-08
genus.Bifidobacterium.id.436	rs9941547	A	G	0.072	0.013	1.37e-08
genus.Bifidobacterium.id.436	rs56263017	C	T	0.106	0.018	1.34e-08
genus.Bifidobacterium.id.436	rs56369660	G	A	0.091	0.017	1.33e-08
genus.Bifidobacterium.id.436	rs4954242	G	A	0.094	0.017	1.31e-08
genus.Bifidobacterium.id.436	rs4954568	A	T	0.072	0.013	1.31e-08
genus.Bifidobacterium.id.436	rs11889843	A	G	0.092	0.017	1.28e-08
genus.Bifidobacterium.id.436	rs3769002	C	T	0.106	0.018	1.24e-08
genus.Bifidobacterium.id.436	rs6706466	G	A	0.091	0.017	1.17e-08
genus.Bifidobacterium.id.436	rs10179271	C	T	0.072	0.013	1.12e-08
genus.Bifidobacterium.id.436	rs2164332	C	G	0.101	0.018	1.11e-08
genus.Bifidobacterium.id.436	rs10928529	A	G	0.093	0.017	1.09e-08
genus.Bifidobacterium.id.436	rs11900832	T	C	0.093	0.017	1.09e-08
genus.Bifidobacterium.id.436	rs3806502	T	C	0.093	0.017	1.09e-08
genus.Bifidobacterium.id.436	rs7322849	T	C	0.112	0.02	1.08e-08
genus.Bifidobacterium.id.436	rs1401687	C	G	0.072	0.013	1.08e-08
genus.Bifidobacterium.id.436	rs7605229	T	C	0.093	0.017	1.07e-08
genus.Bifidobacterium.id.436	rs17293519	G	A	0.091	0.017	1.05e-08
genus.Bifidobacterium.id.436	rs10496736	G	C	0.124	0.022	1.03e-08
genus.Bifidobacterium.id.436	rs3213871	T	C	0.107	0.018	1.02e-08
genus.Bifidobacterium.id.436	rs60433564	C	A	0.124	0.022	9.61e-09
genus.Bifidobacterium.id.436	rs2305248	G	A	0.092	0.017	9.52e-09
genus.Bifidobacterium.id.436	rs2874834	G	A	0.079	0.013	9.46e-09
genus.Bifidobacterium.id.436	rs6749119	G	C	0.091	0.017	9.1e-09
genus.Bifidobacterium.id.436	rs7563997	A	T	0.093	0.017	9.05e-09
genus.Bifidobacterium.id.436	rs7597802	T	A	0.093	0.017	8.96e-09
genus.Bifidobacterium.id.436	rs11897204	C	T	0.092	0.017	8.84e-09
genus.Bifidobacterium.id.436	rs4954513	A	G	0.107	0.018	8.77e-09
genus.Bifidobacterium.id.436	rs4954213	T	G	0.093	0.017	8.62e-09
genus.Bifidobacterium.id.436	rs13408096	T	G	0.093	0.017	8.5e-09
genus.Bifidobacterium.id.436	rs6742013	C	T	0.094	0.017	8.37e-09
genus.Bifidobacterium.id.436	rs6737635	T	G	0.093	0.017	7.96e-09
genus.Bifidobacterium.id.436	rs4954567	T	G	0.073	0.013	7.93e-09
genus.Bifidobacterium.id.436	rs4954221	A	G	0.092	0.017	7.81e-09
genus.Bifidobacterium.id.436	rs6709763	A	C	0.094	0.017	7.39e-09
genus.Bifidobacterium.id.436	rs16832156	A	G	0.103	0.018	7.28e-09
genus.Bifidobacterium.id.436	rs309126	C	T	0.101	0.017	7.22e-09
genus.Bifidobacterium.id.436	rs13410870	A	G	0.092	0.017	7.17e-09
genus.Bifidobacterium.id.436	rs3754692	C	T	0.08	0.013	6.8e-09
genus.Bifidobacterium.id.436	rs1900741	T	C	0.086	0.014	6.78e-09
genus.Bifidobacterium.id.436	rs61663334	G	A	0.091	0.017	6.77e-09
genus.Bifidobacterium.id.436	rs16832275	G	C	0.103	0.018	6.33e-09
genus.Bifidobacterium.id.436	rs11888521	C	G	0.092	0.017	5.66e-09
genus.Bifidobacterium.id.436	rs6739713	G	A	0.08	0.013	5.29e-09
genus.Bifidobacterium.id.436	rs10928513	T	C	0.07	0.012	5.22e-09
genus.Bifidobacterium.id.436	rs11892750	A	G	0.095	0.017	5.09e-09
genus.Bifidobacterium.id.436	rs4494812	G	A	0.093	0.017	5.01e-09
genus.Bifidobacterium.id.436	rs62168934	G	A	0.095	0.017	4.95e-09
genus.Bifidobacterium.id.436	rs2290518	A	G	0.093	0.017	4.93e-09
genus.Bifidobacterium.id.436	rs3768998	T	G	0.106	0.018	4.64e-09
genus.Bifidobacterium.id.436	rs4954226	C	T	0.095	0.017	4.61e-09
genus.Bifidobacterium.id.436	rs16831264	C	G	0.094	0.017	4.61e-09
genus.Bifidobacterium.id.436	rs60350840	G	A	0.095	0.017	4.18e-09
genus.Bifidobacterium.id.436	rs7565149	A	T	0.095	0.017	4.09e-09
genus.Bifidobacterium.id.436	rs10174944	T	C	0.095	0.017	4.08e-09
genus.Bifidobacterium.id.436	rs6430561	T	C	0.094	0.017	4.07e-09
genus.Bifidobacterium.id.436	rs56174523	C	A	0.095	0.017	4.02e-09
genus.Bifidobacterium.id.436	rs58327215	C	G	0.094	0.017	3.91e-09
genus.Bifidobacterium.id.436	rs6741481	G	A	0.094	0.017	3.79e-09
genus.Bifidobacterium.id.436	rs4953946	G	T	0.095	0.017	3.78e-09
genus.Bifidobacterium.id.436	rs7603805	G	A	0.095	0.017	3.75e-09
genus.Bifidobacterium.id.436	rs10209482	C	A	0.096	0.017	3.75e-09
genus.Bifidobacterium.id.436	rs16831498	C	G	0.096	0.017	3.74e-09
genus.Bifidobacterium.id.436	rs11888951	C	T	0.095	0.017	3.73e-09
genus.Bifidobacterium.id.436	rs13427494	A	G	0.096	0.017	3.69e-09
genus.Bifidobacterium.id.436	rs13413872	T	G	0.095	0.017	3.64e-09
genus.Bifidobacterium.id.436	rs7601683	T	C	0.096	0.017	3.63e-09
genus.Bifidobacterium.id.436	rs58426504	G	T	0.094	0.017	3.62e-09
genus.Bifidobacterium.id.436	rs2017831	T	C	0.096	0.017	3.57e-09
genus.Bifidobacterium.id.436	rs4954220	A	C	0.095	0.017	3.38e-09
genus.Bifidobacterium.id.436	rs61087958	T	C	0.095	0.017	3.38e-09
genus.Bifidobacterium.id.436	rs6760553	G	A	0.096	0.017	3.31e-09
genus.Bifidobacterium.id.436	rs10186594	G	A	0.096	0.017	3.3e-09
genus.Bifidobacterium.id.436	rs11898045	C	T	0.094	0.017	3.25e-09
genus.Bifidobacterium.id.436	rs4954212	G	A	0.096	0.017	3.18e-09
genus.Bifidobacterium.id.436	rs13402112	C	A	0.096	0.017	3.09e-09
genus.Bifidobacterium.id.436	rs11890844	G	A	0.096	0.017	3.08e-09
genus.Bifidobacterium.id.436	rs7565268	C	T	0.096	0.017	3.07e-09
genus.Bifidobacterium.id.436	rs7601696	A	C	0.096	0.017	3.07e-09
genus.Bifidobacterium.id.436	rs13402101	A	T	0.096	0.017	3.02e-09
genus.Bifidobacterium.id.436	rs13399376	G	A	0.096	0.017	3.02e-09
genus.Bifidobacterium.id.436	rs7573600	C	G	0.095	0.017	2.97e-09
genus.Bifidobacterium.id.436	rs4954214	T	C	0.096	0.017	2.97e-09
genus.Bifidobacterium.id.436	rs921859	G	A	0.096	0.017	2.9e-09
genus.Bifidobacterium.id.436	rs13409400	C	A	0.096	0.017	2.88e-09
genus.Bifidobacterium.id.436	rs56903548	T	C	0.095	0.017	2.85e-09
genus.Bifidobacterium.id.436	rs62168941	T	C	0.096	0.017	2.78e-09
genus.Bifidobacterium.id.436	rs57829242	G	A	0.097	0.017	2.78e-09
genus.Bifidobacterium.id.436	rs11884903	C	T	0.097	0.017	2.77e-09
genus.Bifidobacterium.id.436	rs7422031	T	C	0.095	0.017	2.75e-09
genus.Bifidobacterium.id.436	rs4640444	C	T	0.094	0.017	2.72e-09
genus.Bifidobacterium.id.436	rs10182750	C	T	0.096	0.017	2.67e-09
genus.Bifidobacterium.id.436	rs7577258	A	G	0.096	0.017	2.63e-09
genus.Bifidobacterium.id.436	rs4645053	A	T	0.094	0.017	2.63e-09
genus.Bifidobacterium.id.436	rs4954217	T	C	0.096	0.017	2.62e-09
genus.Bifidobacterium.id.436	rs58697996	A	G	0.096	0.017	2.58e-09
genus.Bifidobacterium.id.436	rs4953947	C	A	0.096	0.017	2.45e-09
genus.Bifidobacterium.id.436	rs10167809	T	C	0.096	0.017	2.41e-09
genus.Bifidobacterium.id.436	rs10167884	T	C	0.096	0.017	2.41e-09
genus.Bifidobacterium.id.436	rs4953948	G	T	0.096	0.017	2.38e-09
genus.Bifidobacterium.id.436	rs62168942	C	T	0.097	0.017	2.37e-09
genus.Bifidobacterium.id.436	rs6721838	G	A	0.096	0.017	2.35e-09
genus.Bifidobacterium.id.436	rs4954215	A	G	0.097	0.017	2.32e-09
genus.Bifidobacterium.id.436	rs1551497	C	T	0.097	0.017	2.25e-09
genus.Bifidobacterium.id.436	rs7371606	G	A	0.078	0.013	2.2e-09
genus.Bifidobacterium.id.436	rs11903663	G	A	0.095	0.017	2.16e-09
genus.Bifidobacterium.id.436	rs7568525	A	G	0.096	0.017	2.15e-09
genus.Bifidobacterium.id.436	rs4954216	A	G	0.097	0.017	2.15e-09
genus.Bifidobacterium.id.436	rs10167901	T	C	0.097	0.017	2.14e-09
genus.Bifidobacterium.id.436	rs10208624	T	C	0.096	0.017	2.03e-09
genus.Bifidobacterium.id.436	rs13389481	A	C	0.099	0.017	1.88e-09
genus.Bifidobacterium.id.436	rs4953945	G	C	0.099	0.017	1.61e-09
genus.Bifidobacterium.id.436	rs3820794	C	T	0.085	0.014	1.49e-09
genus.Bifidobacterium.id.436	rs925966	C	G	0.079	0.013	1.45e-09
genus.Bifidobacterium.id.436	rs10193348	G	A	0.097	0.017	1.36e-09
genus.Bifidobacterium.id.436	rs2874739	T	C	0.097	0.017	1.32e-09
genus.Bifidobacterium.id.436	rs4346445	C	A	0.097	0.017	1.32e-09
genus.Bifidobacterium.id.436	rs2278544	A	G	0.085	0.014	1.23e-09
genus.Bifidobacterium.id.436	rs12328663	C	T	0.098	0.017	9.93e-10
genus.Bifidobacterium.id.436	rs12616520	A	T	0.086	0.014	9.38e-10
genus.Bifidobacterium.id.436	rs6747073	C	T	0.082	0.013	9.04e-10
genus.Bifidobacterium.id.436	rs1030764	C	T	0.086	0.014	8.26e-10
genus.Bifidobacterium.id.436	rs6704561	T	C	0.081	0.013	7.9e-10
genus.Bifidobacterium.id.436	rs2304599	C	G	0.087	0.014	6.29e-10
genus.Bifidobacterium.id.436	rs998451	G	A	0.073	0.012	6.17e-10
genus.Bifidobacterium.id.436	rs9287442	A	G	0.086	0.014	5.92e-10
genus.Bifidobacterium.id.436	rs2016636	A	G	0.083	0.013	5.45e-10
genus.Bifidobacterium.id.436	rs10188066	G	A	0.087	0.014	5.21e-10
genus.Bifidobacterium.id.436	rs6760329	A	G	0.087	0.014	5.08e-10
genus.Bifidobacterium.id.436	rs10928545	A	G	0.087	0.014	4.26e-10
genus.Bifidobacterium.id.436	rs6714750	G	A	0.085	0.013	3.86e-10
genus.Bifidobacterium.id.436	rs1374329	G	A	0.086	0.014	3.44e-10
genus.Bifidobacterium.id.436	rs935613	T	C	0.084	0.013	3.02e-10
genus.Bifidobacterium.id.436	rs62160860	C	G	0.113	0.018	2.18e-10
genus.Bifidobacterium.id.436	rs1530559	G	A	0.076	0.012	2.11e-10
genus.Bifidobacterium.id.436	rs10187402	G	C	0.085	0.013	1.76e-10
genus.Bifidobacterium.id.436	rs2680880	A	T	0.08	0.012	1.69e-10
genus.Bifidobacterium.id.436	rs2278683	C	A	0.113	0.018	1.48e-10
genus.Bifidobacterium.id.436	rs4954551	A	G	0.113	0.018	1.48e-10
genus.Bifidobacterium.id.436	rs1375132	G	A	0.086	0.013	1.4e-10
genus.Bifidobacterium.id.436	rs6738563	T	G	0.076	0.012	1.12e-10
genus.Bifidobacterium.id.436	rs7587285	C	T	0.113	0.018	1.11e-10
genus.Bifidobacterium.id.436	rs1869829	G	A	0.086	0.013	9.6e-11
genus.Bifidobacterium.id.436	rs6723108	T	G	0.077	0.012	8.12e-11
genus.Bifidobacterium.id.436	rs11893318	C	T	0.115	0.018	6.54e-11
genus.Bifidobacterium.id.436	rs2322659	T	C	0.09	0.013	4.47e-11
genus.Bifidobacterium.id.436	rs13413639	A	C	0.089	0.013	4.36e-11
genus.Bifidobacterium.id.436	rs12619365	T	C	0.09	0.013	3.77e-11
genus.Bifidobacterium.id.436	rs10192827	G	A	0.09	0.013	3.74e-11
genus.Bifidobacterium.id.436	rs7581382	C	T	-0.091	0.015	3.03e-11
genus.Bifidobacterium.id.436	rs4954276	G	A	0.09	0.013	2.98e-11
genus.Bifidobacterium.id.436	rs4954279	A	G	0.09	0.013	2.84e-11
genus.Bifidobacterium.id.436	rs7608045	C	T	0.09	0.013	2.42e-11
genus.Bifidobacterium.id.436	rs1979033	A	G	0.078	0.012	2.4e-11
genus.Bifidobacterium.id.436	rs12469709	C	T	0.091	0.013	2.24e-11
genus.Bifidobacterium.id.436	rs10928542	A	G	0.09	0.013	2.1e-11
genus.Bifidobacterium.id.436	rs12994270	T	A	0.091	0.013	2.01e-11
genus.Bifidobacterium.id.436	rs656326	C	A	0.091	0.013	1.94e-11
genus.Bifidobacterium.id.436	rs6715856	C	T	0.091	0.013	1.83e-11
genus.Bifidobacterium.id.436	rs10173394	C	T	0.092	0.013	1.78e-11
genus.Bifidobacterium.id.436	rs313522	A	T	0.091	0.013	1.59e-11
genus.Bifidobacterium.id.436	rs3213889	A	G	0.092	0.013	1.58e-11
genus.Bifidobacterium.id.436	rs313523	A	G	0.091	0.013	1.54e-11
genus.Bifidobacterium.id.436	rs1470457	G	A	0.092	0.013	1.53e-11
genus.Bifidobacterium.id.436	rs6755383	T	C	0.091	0.013	1.49e-11
genus.Bifidobacterium.id.436	rs11679508	A	T	0.092	0.013	1.4e-11
genus.Bifidobacterium.id.436	rs2034276	T	A	0.091	0.013	1.39e-11
genus.Bifidobacterium.id.436	rs4954280	G	A	0.091	0.013	1.38e-11
genus.Bifidobacterium.id.436	rs6720287	G	A	0.091	0.013	1.36e-11
genus.Bifidobacterium.id.436	rs1446584	G	A	0.091	0.013	1.35e-11
genus.Bifidobacterium.id.436	rs12998387	A	G	0.092	0.013	1.22e-11
genus.Bifidobacterium.id.436	rs10202489	G	A	0.092	0.013	1.22e-11
genus.Bifidobacterium.id.436	rs313517	G	A	0.092	0.013	1.19e-11
genus.Bifidobacterium.id.436	rs932206	C	T	0.083	0.012	1.18e-11
genus.Bifidobacterium.id.436	rs1438307	G	T	0.092	0.013	1.17e-11
genus.Bifidobacterium.id.436	rs13412397	G	A	0.092	0.013	1.03e-11
genus.Bifidobacterium.id.436	rs313524	T	C	0.092	0.013	1.03e-11
genus.Bifidobacterium.id.436	rs10195620	A	T	0.093	0.013	1.03e-11
genus.Bifidobacterium.id.436	rs28453840	G	A	0.093	0.013	9.95e-12
genus.Bifidobacterium.id.436	rs7355359	C	T	0.092	0.013	9.81e-12
genus.Bifidobacterium.id.436	rs71348715	G	T	0.093	0.013	9.3e-12
genus.Bifidobacterium.id.436	rs313518	T	C	0.092	0.013	8.83e-12
genus.Bifidobacterium.id.436	rs11684545	G	T	0.093	0.013	8.79e-12
genus.Bifidobacterium.id.436	rs1438304	A	G	0.093	0.013	8.41e-12
genus.Bifidobacterium.id.436	rs6430589	G	C	0.093	0.013	8.22e-12
genus.Bifidobacterium.id.436	rs10928546	C	T	0.093	0.013	7.97e-12
genus.Bifidobacterium.id.436	rs12998016	C	T	0.093	0.013	7.3e-12
genus.Bifidobacterium.id.436	rs313528	A	G	0.093	0.013	7.01e-12
genus.Bifidobacterium.id.436	rs313526	T	C	0.093	0.013	6.94e-12
genus.Bifidobacterium.id.436	rs313519	C	A	0.093	0.013	6.68e-12
genus.Bifidobacterium.id.436	rs1011361	G	A	0.093	0.013	6.57e-12
genus.Bifidobacterium.id.436	rs71348714	G	A	0.093	0.013	6.39e-12
genus.Bifidobacterium.id.436	rs1438305	C	G	0.093	0.013	6.39e-12
genus.Bifidobacterium.id.436	rs2082729	C	T	0.094	0.013	5.73e-12
genus.Bifidobacterium.id.436	rs11679933	G	T	0.089	0.013	4.8e-12
genus.Bifidobacterium.id.436	rs3739020	G	T	0.095	0.013	3.84e-12
genus.Bifidobacterium.id.436	rs748841	C	T	0.094	0.013	2.11e-12
genus.Bifidobacterium.id.436	rs2164210	T	C	0.094	0.013	1.9e-12
genus.Bifidobacterium.id.436	rs11693502	C	T	0.09	0.013	1.71e-12
genus.Bifidobacterium.id.436	rs2322660	C	T	0.094	0.013	1.6e-12
genus.Bifidobacterium.id.436	rs6742283	A	G	0.095	0.013	1.5e-12
genus.Bifidobacterium.id.436	rs12988076	C	A	0.095	0.013	1.47e-12
genus.Bifidobacterium.id.436	rs17261772	C	T	0.096	0.013	1.25e-12
genus.Bifidobacterium.id.436	rs745500	G	A	0.095	0.013	1.16e-12
genus.Bifidobacterium.id.436	rs892715	T	C	0.095	0.013	1.08e-12
genus.Bifidobacterium.id.436	rs6719488	G	T	0.095	0.013	1.04e-12
genus.Bifidobacterium.id.436	rs3769005	C	G	0.095	0.013	9.71e-13
genus.Bifidobacterium.id.436	rs2011946	C	A	0.092	0.013	5.6e-13
genus.Bifidobacterium.id.436	rs3754686	T	C	0.096	0.013	5.3e-13
genus.Bifidobacterium.id.436	rs12620033	C	G	0.097	0.013	3.36e-13
genus.Bifidobacterium.id.436	rs749873	C	T	0.093	0.012	3.09e-13
genus.Bifidobacterium.id.436	rs2236783	G	A	0.098	0.013	2.16e-13
genus.Bifidobacterium.id.436	rs12475139	A	T	0.097	0.013	1.33e-13
genus.Bifidobacterium.id.436	rs4988183	C	T	0.101	0.013	8.17e-14
genus.Bifidobacterium.id.436	rs4954490	G	A	0.1	0.013	8.13e-14
genus.Bifidobacterium.id.436	rs309149	T	C	0.102	0.013	4.14e-14
genus.Bifidobacterium.id.436	rs309137	C	T	0.1	0.013	4.04e-14
genus.Bifidobacterium.id.436	rs11681248	C	T	0.096	0.012	3.09e-14
genus.Bifidobacterium.id.436	rs309164	C	T	0.103	0.013	1.85e-14
genus.Bifidobacterium.id.436	rs1561277	A	C	0.1	0.013	1.6e-14
genus.Bifidobacterium.id.436	rs309125	T	C	0.102	0.013	1.11e-14
genus.Bifidobacterium.id.436	rs6716536	T	C	0.101	0.013	7.72e-15
genus.Bifidobacterium.id.436	rs632632	C	T	0.103	0.013	6.21e-15
genus.Bifidobacterium.id.436	rs12615624	G	A	0.105	0.013	5.81e-15
genus.Bifidobacterium.id.436	rs6759321	T	G	0.102	0.013	4.6e-15
genus.Bifidobacterium.id.436	rs309180	G	A	0.105	0.013	3.11e-15
genus.Bifidobacterium.id.436	rs309134	A	G	0.107	0.013	1.32e-15
genus.Bifidobacterium.id.436	rs218174	G	A	0.106	0.013	1.06e-15
genus.Bifidobacterium.id.436	rs13023281	C	T	-0.104	0.013	7.23e-16
genus.Bifidobacterium.id.436	rs309168	T	C	0.107	0.013	6.85e-16
genus.Bifidobacterium.id.436	rs309160	T	C	0.108	0.013	3.68e-16
genus.Bifidobacterium.id.436	rs13404551	C	T	0.11	0.013	6.82e-17
genus.Bifidobacterium.id.436	rs687670	C	T	0.111	0.013	2.6e-17
genus.Bifidobacterium.id.436	rs36084664	G	A	-0.111	0.014	7.39e-18
genus.Bifidobacterium.id.436	rs1446585	G	A	0.114	0.013	1.94e-18
genus.Bifidobacterium.id.436	rs12465802	A	G	0.112	0.013	1.73e-18
genus.Bifidobacterium.id.436	rs6730157	G	A	0.111	0.013	1.72e-18
genus.Bifidobacterium.id.436	rs1375131	C	T	0.112	0.013	1.02e-18
genus.Bifidobacterium.id.436	rs7570971	A	C	0.113	0.013	2.01e-19
genus.Bifidobacterium.id.436	rs6754311	C	T	0.117	0.013	6.96e-20
genus.Bifidobacterium.id.436	rs4988235	G	A	0.119	0.013	2.49e-20
genus.Bifidobacterium.id.436	rs182549	C	T	0.12	0.013	1.28e-20
genus.Bilophila.id.3170	rs2713348	A	G	0.061	0.014	9.91e-06
genus.Bilophila.id.3170	rs10974873	C	T	0.066	0.015	9.55e-06
genus.Bilophila.id.3170	rs1969927	G	A	0.056	0.013	9.07e-06
genus.Bilophila.id.3170	rs9899990	A	G	-0.103	0.023	9.07e-06
genus.Bilophila.id.3170	rs1261690	T	C	-0.07	0.016	9.03e-06
genus.Bilophila.id.3170	rs1241179	A	G	-0.071	0.016	8.75e-06
genus.Bilophila.id.3170	rs3862170	G	A	0.074	0.017	8.67e-06
genus.Bilophila.id.3170	rs2713349	A	T	0.062	0.014	8.63e-06
genus.Bilophila.id.3170	rs60178956	G	A	-0.062	0.014	8.06e-06
genus.Bilophila.id.3170	rs1763359	C	T	-0.071	0.016	7.98e-06
genus.Bilophila.id.3170	rs1676510	A	G	-0.071	0.016	7.86e-06
genus.Bilophila.id.3170	rs59441360	C	A	0.074	0.017	7.74e-06
genus.Bilophila.id.3170	rs11069458	T	C	-0.068	0.016	7.72e-06
genus.Bilophila.id.3170	rs11081071	C	T	0.075	0.017	7.63e-06
genus.Bilophila.id.3170	rs1917709	A	T	0.119	0.027	7.37e-06
genus.Bilophila.id.3170	rs4798126	G	A	0.073	0.017	7.15e-06
genus.Bilophila.id.3170	rs10230993	C	T	0.063	0.014	6.83e-06
genus.Bilophila.id.3170	rs1263061	A	G	-0.072	0.016	6.53e-06
genus.Bilophila.id.3170	rs10954637	G	T	0.063	0.014	6.42e-06
genus.Bilophila.id.3170	rs2728491	G	T	-0.063	0.014	6.33e-06
genus.Bilophila.id.3170	rs72676854	T	C	0.123	0.027	5.62e-06
genus.Bilophila.id.3170	rs8013541	A	T	-0.057	0.013	5.48e-06
genus.Bilophila.id.3170	rs542415	T	C	-0.061	0.013	4.71e-06
genus.Bilophila.id.3170	rs4506138	T	C	0.064	0.014	4.54e-06
genus.Bilophila.id.3170	rs45577639	A	G	0.069	0.015	4.25e-06
genus.Bilophila.id.3170	rs1241171	G	A	-0.069	0.015	4.24e-06
genus.Bilophila.id.3170	rs10954636	G	C	0.064	0.014	4.09e-06
genus.Bilophila.id.3170	rs3818204	A	G	0.078	0.017	3.64e-06
genus.Bilophila.id.3170	rs6793291	C	A	0.113	0.024	3.11e-06
genus.Bilophila.id.3170	rs10758666	T	G	0.082	0.017	2.22e-06
genus.Bilophila.id.3170	rs1327489	C	T	0.081	0.017	1.9e-06
genus.Bilophila.id.3170	rs3827020	C	T	0.077	0.016	1.79e-06
genus.Bilophila.id.3170	rs7802841	C	A	0.067	0.014	1.77e-06
genus.Bilophila.id.3170	rs1571225	C	T	0.083	0.017	1.12e-06
genus.Bilophila.id.3170	rs116261629	G	C	0.128	0.026	8.62e-07
genus.Blautia.id.1992	rs117001700	T	C	0.196	0.044	8.84e-06
genus.Blautia.id.1992	rs16892041	T	C	-0.062	0.014	8.82e-06
genus.Blautia.id.1992	rs67402703	A	G	0.054	0.012	8.66e-06
genus.Blautia.id.1992	rs2917871	G	C	0.049	0.011	8.47e-06
genus.Blautia.id.1992	rs12668576	A	C	0.055	0.012	8.46e-06
genus.Blautia.id.1992	rs17147246	G	C	0.054	0.012	8.4e-06
genus.Blautia.id.1992	rs2017197	G	C	0.115	0.025	8.26e-06
genus.Blautia.id.1992	rs3005519	G	A	0.049	0.011	8.25e-06
genus.Blautia.id.1992	rs1529992	G	T	0.049	0.011	8.12e-06
genus.Blautia.id.1992	rs683119	T	G	-0.058	0.013	7.46e-06
genus.Blautia.id.1992	rs67645219	C	T	0.056	0.012	7.17e-06
genus.Blautia.id.1992	rs2788271	T	G	-0.058	0.013	7.16e-06
genus.Blautia.id.1992	rs113271346	C	T	0.078	0.017	6.85e-06
genus.Blautia.id.1992	rs67597570	C	T	0.055	0.012	6.23e-06
genus.Blautia.id.1992	rs3005511	A	G	0.05	0.011	6.19e-06
genus.Blautia.id.1992	rs112309597	T	A	0.056	0.012	6.1e-06
genus.Blautia.id.1992	rs67313756	C	G	0.053	0.012	6.07e-06
genus.Blautia.id.1992	rs12669850	A	C	0.055	0.012	5.85e-06
genus.Blautia.id.1992	rs55821618	A	G	0.055	0.012	5.85e-06
genus.Blautia.id.1992	rs13330279	G	A	0.118	0.025	5.38e-06
genus.Blautia.id.1992	rs115043014	G	A	-0.207	0.044	5.19e-06
genus.Blautia.id.1992	rs4926264	T	C	0.083	0.018	5.1e-06
genus.Blautia.id.1992	rs682885	A	G	-0.049	0.011	4.49e-06
genus.Blautia.id.1992	rs7860714	A	G	-0.05	0.011	4.09e-06
genus.Blautia.id.1992	rs73219072	C	T	0.057	0.012	4.05e-06
genus.Blautia.id.1992	rs66498553	G	A	0.057	0.012	3.15e-06
genus.Blautia.id.1992	rs67619974	G	A	0.058	0.012	2.67e-06
genus.Blautia.id.1992	rs28609389	C	T	0.056	0.012	2.65e-06
genus.Blautia.id.1992	rs66932009	A	G	0.059	0.012	2.08e-06
genus.Blautia.id.1992	rs66876068	G	A	0.059	0.012	1.92e-06
genus.Blautia.id.1992	rs72607721	A	C	0.059	0.012	1.86e-06
genus.Blautia.id.1992	rs66908300	T	C	0.058	0.012	1.76e-06
genus.Blautia.id.1992	rs72973581	A	G	0.125	0.027	1.74e-06
genus.Blautia.id.1992	rs66699833	A	G	0.059	0.012	1.73e-06
genus.Blautia.id.1992	rs72607722	A	G	0.06	0.012	1.56e-06
genus.Blautia.id.1992	rs12670293	A	G	0.06	0.012	1.5e-06
genus.Blautia.id.1992	rs55798850	G	A	0.06	0.012	1.47e-06
genus.Blautia.id.1992	rs12453000	C	T	0.063	0.013	1.26e-06
genus.Blautia.id.1992	rs11149971	C	T	0.118	0.023	1.04e-06
genus.Blautia.id.1992	rs67794373	C	T	0.06	0.012	1e-06
genus.Butyricicoccus.id.2055	rs10174174	C	T	0.055	0.012	9.91e-06
genus.Butyricicoccus.id.2055	rs7593240	A	G	0.055	0.012	9.84e-06
genus.Butyricicoccus.id.2055	rs12034718	A	G	0.07	0.016	9.58e-06
genus.Butyricicoccus.id.2055	rs4129082	C	G	0.055	0.012	9.18e-06
genus.Butyricicoccus.id.2055	rs2390280	A	G	0.08	0.018	8.65e-06
genus.Butyricicoccus.id.2055	rs10084203	A	G	0.055	0.012	8.59e-06
genus.Butyricicoccus.id.2055	rs7320057	G	A	0.08	0.018	7.99e-06
genus.Butyricicoccus.id.2055	rs4962426	G	T	0.061	0.014	7.38e-06
genus.Butyricicoccus.id.2055	rs75238760	T	A	0.062	0.014	6.8e-06
genus.Butyricicoccus.id.2055	rs141519424	G	A	0.075	0.017	6.67e-06
genus.Butyricicoccus.id.2055	rs62478070	T	G	0.224	0.049	5.94e-06
genus.Butyricicoccus.id.2055	rs12585793	T	C	-0.262	0.056	5.79e-06
genus.Butyricicoccus.id.2055	rs7322368	T	C	0.082	0.018	5.52e-06
genus.Butyricicoccus.id.2055	rs16831418	T	G	0.077	0.017	4.75e-06
genus.Butyricicoccus.id.2055	rs60131947	T	C	0.077	0.017	4.38e-06
genus.Butyricicoccus.id.2055	rs4380522	C	T	-0.05	0.011	4.26e-06
genus.Butyricicoccus.id.2055	rs2017189	G	T	-0.051	0.011	3.87e-06
genus.Butyricicoccus.id.2055	rs56221232	T	C	0.083	0.017	7.62e-07
genus.Butyricimonas.id.945	rs2591757	G	C	0.063	0.014	9.87e-06
genus.Butyricimonas.id.945	rs113040517	G	C	-0.07	0.016	9.68e-06
genus.Butyricimonas.id.945	rs77723681	T	C	-0.143	0.033	9.6e-06
genus.Butyricimonas.id.945	rs56093015	C	T	0.066	0.015	9.48e-06
genus.Butyricimonas.id.945	rs72814526	G	A	0.066	0.015	9.43e-06
genus.Butyricimonas.id.945	rs1485997	G	A	0.062	0.014	8.85e-06
genus.Butyricimonas.id.945	rs2591801	G	A	0.063	0.014	8.81e-06
genus.Butyricimonas.id.945	rs2924725	T	C	0.068	0.015	8.42e-06
genus.Butyricimonas.id.945	rs72814525	A	G	0.066	0.015	8.25e-06
genus.Butyricimonas.id.945	rs605188	T	C	0.062	0.014	8.24e-06
genus.Butyricimonas.id.945	rs1900181	A	T	0.064	0.014	8.21e-06
genus.Butyricimonas.id.945	rs326049	C	G	0.076	0.017	8.19e-06
genus.Butyricimonas.id.945	rs67694451	A	G	-0.086	0.02	7.7e-06
genus.Butyricimonas.id.945	rs1701950	G	C	-0.105	0.024	7.68e-06
genus.Butyricimonas.id.945	rs9981005	A	G	-0.117	0.026	6.9e-06
genus.Butyricimonas.id.945	rs2114713	G	T	0.063	0.014	6.88e-06
genus.Butyricimonas.id.945	rs1466576	C	T	0.063	0.014	6.74e-06
genus.Butyricimonas.id.945	rs4747116	C	T	0.064	0.014	6.73e-06
genus.Butyricimonas.id.945	rs12304031	G	A	-0.086	0.02	6.7e-06
genus.Butyricimonas.id.945	rs11228830	A	G	0.135	0.03	6.55e-06
genus.Butyricimonas.id.945	rs12458763	A	C	0.122	0.027	6.37e-06
genus.Butyricimonas.id.945	rs929839	T	G	0.112	0.025	6.16e-06
genus.Butyricimonas.id.945	rs7093802	C	G	0.063	0.014	5.94e-06
genus.Butyricimonas.id.945	rs1872571	T	C	0.064	0.014	5.92e-06
genus.Butyricimonas.id.945	rs2924726	A	G	0.067	0.015	5.9e-06
genus.Butyricimonas.id.945	rs11738176	A	C	0.065	0.015	5.43e-06
genus.Butyricimonas.id.945	rs270727	G	C	-0.069	0.015	5.38e-06
genus.Butyricimonas.id.945	rs10823645	T	G	0.064	0.014	5.28e-06
genus.Butyricimonas.id.945	rs71428626	G	T	-0.133	0.029	4.8e-06
genus.Butyricimonas.id.945	rs1862649	G	A	0.113	0.025	4.76e-06
genus.Butyricimonas.id.945	rs9657374	C	T	0.068	0.015	4.5e-06
genus.Butyricimonas.id.945	rs868015	A	G	0.066	0.014	4.11e-06
genus.Butyricimonas.id.945	rs78453362	A	G	-0.149	0.033	4.06e-06
genus.Butyricimonas.id.945	rs12769722	T	C	0.065	0.014	4.03e-06
genus.Butyricimonas.id.945	rs2591802	A	C	0.066	0.015	4.01e-06
genus.Butyricimonas.id.945	rs62130338	G	A	-0.073	0.016	3.9e-06
genus.Butyricimonas.id.945	rs1338636	T	C	0.065	0.014	3.83e-06
genus.Butyricimonas.id.945	rs1338635	A	G	0.066	0.014	3.51e-06
genus.Butyricimonas.id.945	rs11595369	T	C	0.066	0.014	3.48e-06
genus.Butyricimonas.id.945	rs11748099	T	C	0.067	0.015	3.11e-06
genus.Butyricimonas.id.945	rs2591754	T	A	0.067	0.015	3.02e-06
genus.Butyricimonas.id.945	rs1982775	T	C	0.066	0.014	2.91e-06
genus.Butyricimonas.id.945	rs4747117	T	G	0.066	0.014	2.86e-06
genus.Butyricimonas.id.945	rs2591756	T	A	0.067	0.015	2.86e-06
genus.Butyricimonas.id.945	rs1416263	T	G	0.067	0.014	2.47e-06
genus.Butyricimonas.id.945	rs1038524	A	G	0.067	0.014	2.44e-06
genus.Butyricimonas.id.945	rs1466575	T	C	0.066	0.014	2.31e-06
genus.Butyricimonas.id.945	rs782080	T	A	0.065	0.014	2.23e-06
genus.Butyricimonas.id.945	rs11908936	G	A	-0.126	0.026	2.09e-06
genus.Butyricimonas.id.945	rs1466574	T	G	0.067	0.014	2e-06
genus.Butyricimonas.id.945	rs867047	T	G	0.067	0.014	1.96e-06
genus.Butyricimonas.id.945	rs251174	T	C	0.069	0.015	1.75e-06
genus.Butyricimonas.id.945	rs2205439	G	A	-0.132	0.027	1.58e-06
genus.Butyricimonas.id.945	rs4746071	T	C	0.068	0.014	1.19e-06
genus.Butyricimonas.id.945	rs2823125	G	A	-0.136	0.027	9.77e-07
genus.Butyricimonas.id.945	rs7083431	A	C	0.07	0.014	8.85e-07
genus.Butyricimonas.id.945	rs138323763	G	A	-0.136	0.027	8.68e-07
genus.Butyricimonas.id.945	rs78496505	T	C	-0.087	0.017	8.6e-07
genus.Butyricimonas.id.945	rs2642760	G	C	0.071	0.015	8.58e-07
genus.Butyricimonas.id.945	rs62390301	T	C	-0.087	0.017	7.42e-07
genus.Butyricimonas.id.945	rs8127278	G	A	-0.138	0.027	5.67e-07
genus.Butyricimonas.id.945	rs17002267	G	C	-0.141	0.027	5.01e-07
genus.Butyricimonas.id.945	rs111284490	T	C	-0.144	0.027	1.77e-07
genus.Butyricimonas.id.945	rs113054641	G	A	-0.145	0.027	1.74e-07
genus.Butyrivibrio.id.1993	rs11658561	C	T	0.118	0.027	1e-05
genus.Butyrivibrio.id.1993	rs34435489	C	T	-0.107	0.024	9.96e-06
genus.Butyrivibrio.id.1993	rs56827	C	T	-0.107	0.024	9.89e-06
genus.Butyrivibrio.id.1993	rs1970323	C	T	0.114	0.026	9.88e-06
genus.Butyrivibrio.id.1993	rs7222581	G	A	0.118	0.027	9.77e-06
genus.Butyrivibrio.id.1993	rs6702967	C	T	0.176	0.039	9.74e-06
genus.Butyrivibrio.id.1993	rs8079738	C	T	0.119	0.027	9.23e-06
genus.Butyrivibrio.id.1993	rs36073314	G	A	0.176	0.039	8.96e-06
genus.Butyrivibrio.id.1993	rs16934069	T	C	-0.134	0.03	8.86e-06
genus.Butyrivibrio.id.1993	rs6429094	G	A	0.171	0.038	8.79e-06
genus.Butyrivibrio.id.1993	rs9907578	C	A	0.115	0.026	8.77e-06
genus.Butyrivibrio.id.1993	rs12087848	T	C	0.176	0.039	8.72e-06
genus.Butyrivibrio.id.1993	rs68014746	A	G	0.114	0.026	8.63e-06
genus.Butyrivibrio.id.1993	rs17163231	G	A	0.138	0.031	8.56e-06
genus.Butyrivibrio.id.1993	rs3844555	T	C	0.137	0.031	8.51e-06
genus.Butyrivibrio.id.1993	rs465782	A	G	-0.118	0.026	8.35e-06
genus.Butyrivibrio.id.1993	rs34115873	A	G	0.114	0.026	8.31e-06
genus.Butyrivibrio.id.1993	rs7527753	T	C	0.169	0.037	8.19e-06
genus.Butyrivibrio.id.1993	rs4928024	A	G	-0.175	0.039	8.19e-06
genus.Butyrivibrio.id.1993	rs2310984	G	A	0.114	0.026	8.19e-06
genus.Butyrivibrio.id.1993	rs4627235	A	G	-0.126	0.028	8.1e-06
genus.Butyrivibrio.id.1993	rs9370258	T	G	0.119	0.027	8.07e-06
genus.Butyrivibrio.id.1993	rs7537	A	T	0.179	0.04	8.03e-06
genus.Butyrivibrio.id.1993	rs1007475	G	T	0.118	0.026	7.92e-06
genus.Butyrivibrio.id.1993	rs28846706	A	G	0.176	0.039	7.87e-06
genus.Butyrivibrio.id.1993	rs1989574	T	C	-0.108	0.024	7.42e-06
genus.Butyrivibrio.id.1993	rs1970324	G	A	0.115	0.026	7.39e-06
genus.Butyrivibrio.id.1993	rs8068101	C	T	0.114	0.026	7.3e-06
genus.Butyrivibrio.id.1993	rs6587085	G	C	0.115	0.026	7.26e-06
genus.Butyrivibrio.id.1993	rs240993	T	C	-0.119	0.026	7.21e-06
genus.Butyrivibrio.id.1993	rs8073494	G	A	0.115	0.026	7.12e-06
genus.Butyrivibrio.id.1993	rs10457240	G	A	-0.109	0.024	7.02e-06
genus.Butyrivibrio.id.1993	rs9579032	G	A	-0.117	0.026	6.89e-06
genus.Butyrivibrio.id.1993	rs142855850	A	G	0.205	0.046	6.86e-06
genus.Butyrivibrio.id.1993	rs10070855	C	G	0.14	0.031	6.74e-06
genus.Butyrivibrio.id.1993	rs240991	C	G	-0.119	0.026	6.7e-06
genus.Butyrivibrio.id.1993	rs77356209	T	C	0.217	0.048	6.66e-06
genus.Butyrivibrio.id.1993	rs1002475	T	C	-0.109	0.024	6.66e-06
genus.Butyrivibrio.id.1993	rs486484	A	G	-0.108	0.024	6.61e-06
genus.Butyrivibrio.id.1993	rs12745648	G	A	0.17	0.037	6.48e-06
genus.Butyrivibrio.id.1993	rs8064233	C	T	0.115	0.026	6.43e-06
genus.Butyrivibrio.id.1993	rs11768123	C	T	0.162	0.035	6.38e-06
genus.Butyrivibrio.id.1993	rs240954	G	A	-0.11	0.024	6.35e-06
genus.Butyrivibrio.id.1993	rs9899333	C	T	0.116	0.026	6.26e-06
genus.Butyrivibrio.id.1993	rs17539197	C	G	-0.109	0.024	5.94e-06
genus.Butyrivibrio.id.1993	rs240974	C	T	-0.11	0.024	5.87e-06
genus.Butyrivibrio.id.1993	rs11584386	G	A	0.172	0.037	5.8e-06
genus.Butyrivibrio.id.1993	rs12529158	A	G	-0.11	0.024	5.77e-06
genus.Butyrivibrio.id.1993	rs6661508	A	G	0.171	0.037	5.66e-06
genus.Butyrivibrio.id.1993	rs8074123	T	G	0.116	0.026	5.65e-06
genus.Butyrivibrio.id.1993	rs9349693	A	G	0.118	0.026	5.55e-06
genus.Butyrivibrio.id.1993	rs17163238	G	A	0.141	0.031	5.51e-06
genus.Butyrivibrio.id.1993	rs12937276	T	C	0.117	0.026	5.31e-06
genus.Butyrivibrio.id.1993	rs10457241	A	G	-0.11	0.024	5.26e-06
genus.Butyrivibrio.id.1993	rs12094865	A	G	0.171	0.037	5.12e-06
genus.Butyrivibrio.id.1993	rs72759722	T	C	0.172	0.037	5.03e-06
genus.Butyrivibrio.id.1993	rs6704046	A	G	0.172	0.037	5.02e-06
genus.Butyrivibrio.id.1993	rs8070756	C	T	0.121	0.027	4.98e-06
genus.Butyrivibrio.id.1993	rs11577669	A	T	0.172	0.037	4.94e-06
genus.Butyrivibrio.id.1993	rs10925630	T	A	0.172	0.037	4.94e-06
genus.Butyrivibrio.id.1993	rs11153290	T	C	-0.11	0.024	4.89e-06
genus.Butyrivibrio.id.1993	rs28375463	T	C	0.122	0.027	4.78e-06
genus.Butyrivibrio.id.1993	rs12726892	T	C	0.179	0.039	4.77e-06
genus.Butyrivibrio.id.1993	rs406774	T	C	-0.121	0.026	4.56e-06
genus.Butyrivibrio.id.1993	rs75299367	C	T	-0.203	0.044	4.51e-06
genus.Butyrivibrio.id.1993	rs11579933	A	C	0.179	0.039	4.39e-06
genus.Butyrivibrio.id.1993	rs12079328	T	A	0.174	0.037	4.37e-06
genus.Butyrivibrio.id.1993	rs12190634	A	G	-0.111	0.024	4.36e-06
genus.Butyrivibrio.id.1993	rs463860	T	C	-0.111	0.024	4.35e-06
genus.Butyrivibrio.id.1993	rs3851225	A	G	-0.111	0.024	4.34e-06
genus.Butyrivibrio.id.1993	rs11153291	T	C	-0.111	0.024	4.32e-06
genus.Butyrivibrio.id.1993	rs8074459	G	A	0.118	0.026	4.3e-06
genus.Butyrivibrio.id.1993	rs240994	T	C	-0.112	0.024	4.29e-06
genus.Butyrivibrio.id.1993	rs11153288	T	A	-0.111	0.024	4.27e-06
genus.Butyrivibrio.id.1993	rs11653345	G	A	0.119	0.026	4.26e-06
genus.Butyrivibrio.id.1993	rs455726	G	A	-0.I11	0.024	4.26e-06
genus.Butyrivibrio.id.1993	rs11204311	C	T	0.119	0.026	4.25e-06
genus.Butyrivibrio.id.1993	rs458486	T	C	-0.111	0.024	4.23e-06
genus.Butyrivibrio.id.1993	rs455732	C	T	-0.111	0.024	4.17e-06
genus.Butyrivibrio.id.1993	rs7211005	C	T	0.123	0.027	4.14e-06
genus.Butyrivibrio.id.1993	rs10872068	G	C	-0.111	0.024	4.14e-06
genus.Butyrivibrio.id.1993	rs12744713	G	A	0.174	0.037	3.97e-06
genus.Butyrivibrio.id.1993	rs11153294	T	C	-0.111	0.024	3.92e-06
genus.Butyrivibrio.id.1993	rs12757197	A	G	0.18	0.039	3.84e-06
genus.Butyrivibrio.id.1993	rs11153292	G	A	-0.112	0.024	3.77e-06
genus.Butyrivibrio.id.1993	rs9899961	T	C	0.119	0.026	3.48e-06
genus.Butyrivibrio.id.1993	rs7780509	T	G	0.15	0.032	3.42e-06
genus.Butyrivibrio.id.1993	rs9903225	G	A	0.119	0.026	3.35e-06
genus.Butyrivibrio.id.1993	rs28552674	T	C	0.182	0.039	3.31e-06
genus.Butyrivibrio.id.1993	rs12758637	A	G	0.182	0.039	3.31e-06
genus.Butyrivibrio.id.1993	rs462432	G	A	-0.112	0.024	3.19e-06
genus.Butyrivibrio.id.1993	rs7763512	G	A	0.12	0.025	3.11e-06
genus.Butyrivibrio.id.1993	rs61269242	T	C	-0.113	0.024	3.04e-06
genus.Butyrivibrio.id.1993	rs12745118	A	G	0.176	0.037	3.02e-06
genus.Butyrivibrio.id.1993	rs12938033	C	T	0.119	0.026	3.02e-06
genus.Butyrivibrio.id.1993	rs11657793	T	G	0.12	0.026	2.88e-06
genus.Butyrivibrio.id.1993	rs8075758	A	C	0.121	0.026	2.83e-06
genus.Butyrivibrio.id.1993	rs7451051	G	A	-0.113	0.024	2.8e-06
genus.Butyrivibrio.id.1993	rs4276544	A	G	-0.113	0.024	2.79e-06
genus.Butyrivibrio.id.1993	rs6696235	T	C	0.187	0.039	2.6e-06
genus.Butyrivibrio.id.1993	rs459403	T	C	-0.113	0.024	2.57e-06
genus.Butyrivibrio.id.1993	rs11153293	A	T	-0.113	0.024	2.55e-06
genus.Butyrivibrio.id.1993	rs11756643	C	T	-0.113	0.024	2.55e-06
genus.Butyrivibrio.id.1993	rs8072835	G	A	0.12	0.026	2.54e-06
genus.Butyrivibrio.id.1993	rs12451977	G	C	0.121	0.026	2.54e-06
genus.Butyrivibrio.id.1993	rs74622183	A	G	-0.201	0.043	2.46e-06
genus.Butyrivibrio.id.1993	rs8075922	A	G	0.12	0.026	2.42e-06
genus.Butyrivibrio.id.1993	rs445349	A	G	-0.114	0.024	2.33e-06
genus.Butyrivibrio.id.1993	rs62492398	T	G	0.154	0.032	2.31e-06
genus.Butyrivibrio.id.1993	rs12943847	C	A	0.126	0.027	2.28e-06
genus.Butyrivibrio.id.1993	rs462493	T	C	-0.114	0.024	2.25e-06
genus.Butyrivibrio.id.1993	rs11761679	T	C	0.155	0.032	2.2e-06
genus.Butyrivibrio.id.1993	rs62420437	T	C	-0.114	0.024	2.16e-06
genus.Butyrivibrio.id.1993	rs71640701	A	G	0.187	0.039	2.12e-06
genus.Butyrivibrio.id.1993	rs9581730	C	T	-0.124	0.026	2.12e-06
genus.Butyrivibrio.id.1993	rs9581732	A	G	-0.124	0.026	2.1e-06
genus.Butyrivibrio.id.1993	rs110732	G	T	-0.114	0.024	2.06e-06
genus.Butyrivibrio.id.1993	rs7992720	G	C	-0.124	0.026	2.03e-06
genus.Butyrivibrio.id.1993	rs10456875	A	G	-0.115	0.024	2.03e-06
genus.Butyrivibrio.id.1993	rs9581731	C	T	-0.124	0.026	2.03e-06
genus.Butyrivibrio.id.1993	rs456871	C	T	-0.114	0.024	2.02e-06
genus.Butyrivibrio.id.1993	rs465795	C	T	-0.115	0.024	2.01e-06
genus.Butyrivibrio.id.1993	rs7992015	T	C	-0.124	0.026	2.01e-06
genus.Butyrivibrio.id.1993	rs7990675	T	G	-0.124	0.026	2.01e-06
genus.Butyrivibrio.id.1993	rs9579031	G	A	-0.124	0.026	2e-06
genus.Butyrivibrio.id.1993	rs9581728	T	C	-0.124	0.026	2e-06
genus.Butyrivibrio.id.1993	rs9581727	T	C	-0.124	0.026	1.99e-06
genus.Butyrivibrio.id.1993	rs1374010	T	C	-0.124	0.026	1.97e-06
genus.Butyrivibrio.id.1993	rs9581729	C	T	-0.124	0.026	1.95e-06
genus.Butyrivibrio.id.1993	rs467042	C	T	-0.115	0.024	1.94e-06
genus.Butyrivibrio.id.1993	rs466923	T	C	-0.115	0.024	1.93e-06
genus.Butyrivibrio.id.1993	rs12214380	T	C	-0.115	0.024	1.91e-06
genus.Butyrivibrio.id.1993	rs7997900	C	T	-0.124	0.026	1.87e-06
genus.Butyrivibrio.id.1993	rs455335	A	G	-0.115	0.024	1.86e-06
genus.Butyrivibrio.id.1993	rs7992159	T	C	-0.124	0.026	1.85e-06
genus.Butyrivibrio.id.1993	rs4537857	T	C	-0.125	0.026	1.8e-06
genus.Butyrivibrio.id.1993	rs9901771	T	C	0.123	0.026	1.78e-06
genus.Butyrivibrio.id.1993	rs455247	G	A	-0.115	0.024	1.76e-06
genus.Butyrivibrio.id.1993	rs456569	T	G	-0.115	0.024	1.71e-06
genus.Butyrivibrio.id.1993	rs7412979	C	G	0.187	0.039	1.71e-06
genus.Butyrivibrio.id.1993	rs1623806	T	C	-0.115	0.024	1.68e-06
genus.Butyrivibrio.id.1993	rs463242	G	A	-0.116	0.024	1.61e-06
genus.Butyrivibrio.id.1993	rs463853	C	G	-0.116	0.024	1.56e-06
genus.Butyrivibrio.id.1993	rs16941336	C	T	0.127	0.027	1.53e-06
genus.Butyrivibrio.id.1993	rs464401	G	A	-0.116	0.024	1.5e-06
genus.Butyrivibrio.id.1993	rs463854	C	G	-0.116	0.024	1.42e-06
genus.Butyrivibrio.id.1993	rs9689727	T	C	-0.116	0.024	1.41e-06
genus.Butyrivibrio.id.1993	rs10872067	T	C	-0.117	0.024	1.11e-06
genus.Butyrivibrio.id.1993	rs6913769	G	A	-0.118	0.024	1.06e-06
genus.Butyrivibrio.id.1993	rs6568680	C	T	-0.118	0.024	1e-06
genus.Butyrivibrio.id.1993	rs12211763	A	G	-0.118	0.024	9.24e-07
genus.Butyrivibrio.id.1993	rs7764591	G	C	-0.119	0.024	8.73e-07
genus.Butyrivibrio.id.1993	rs7750792	T	C	-0.119	0.024	8.73e-07
genus.Butyrivibrio.id.1993	rs72723662	C	T	0.224	0.045	7.86e-07
genus.Butyrivibrio.id.1993	rs7752361	A	G	-0.119	0.024	7.69e-07
genus.CandidatusSoleaferrea.id.11350	rs12681352	T	C	-0.088	0.02	9.98e-06
genus.CandidatusSoleaferrea.id.11350	rs12197912	T	C	-0.12	0.028	9.9e-06
genus.CandidatusSoleaferrea.id.11350	rs74214552	G	C	0.102	0.024	9.89e-06
genus.CandidatusSoleaferrea.id.11350	rs12679756	A	G	-0.083	0.019	9.69e-06
genus.CandidatusSoleaferrea.id.11350	rs830149	C	G	0.185	0.04	9.58e-06
genus.CandidatusSoleaferrea.id.11350	rs2193878	T	A	0.228	0.051	9.46e-06
genus.CandidatusSoleaferrea.id.11350	rs12140117	C	A	0.102	0.023	9.41e-06
genus.CandidatusSoleaferrea.id.11350	rs7400877	T	C	-0.095	0.021	9.29e-06
genus.CandidatusSoleaferrea.id.11350	rs6881988	G	C	-0.082	0.018	9.23e-06
genus.CandidatusSoleaferrea.id.11350	rs75263286	C	G	-0.121	0.028	9.22e-06
genus.CandidatusSoleaferrea.id.11350	rs12205053	C	T	-0.12	0.028	9.16e-06
genus.CandidatusSoleaferrea.id.11350	rs12141016	C	T	0.102	0.023	9.13e-06
genus.CandidatusSoleaferrea.id.11350	rs12205061	C	T	-0.12	0.028	8.81e-06
genus.CandidatusSoleaferrea.id.11350	rs11755471	C	T	-0.121	0.028	8.76e-06
genus.CandidatusSoleaferrea.id.11350	rs7759014	G	A	-0.121	0.028	8.54e-06
genus.CandidatusSoleaferrea.id.11350	rs62203853	A	C	0.1	0.022	8.38e-06
genus.CandidatusSoleaferrea.id.11350	rs386526	C	G	0.082	0.018	8.33e-06
genus.CandidatusSoleaferrea.id.11350	rs12206634	A	G	-0.122	0.028	8.25e-06
genus.CandidatusSoleaferrea.id.11350	rs74188131	G	T	0.102	0.024	8.06e-06
genus.CandidatusSoleaferrea.id.11350	rs10457187	A	G	-0.121	0.028	8.05e-06
genus.CandidatusSoleaferrea.id.11350	rs6489992	A	G	-0.084	0.019	7.89e-06
genus.CandidatusSoleaferrea.id.11350	rs11071652	C	G	-0.096	0.021	7.83e-06
genus.CandidatusSoleaferrea.id.11350	rs12198088	T	C	-0.121	0.028	7.75e-06
genus.CandidatusSoleaferrea.id.11350	rs12500231	A	T	0.081	0.018	7.68e-06
genus.CandidatusSoleaferrea.id.11350	rs13269653	G	A	-0.09	0.02	7.67e-06
genus.CandidatusSoleaferrea.id.11350	rs79465564	T	C	-0.121	0.028	7.56e-06
genus.CandidatusSoleaferrea.id.11350	rs12374658	C	T	-0.121	0.028	7.33e-06
genus.CandidatusSoleaferrea.id.11350	rs75942063	A	G	-0.122	0.028	7.1e-06
genus.CandidatusSoleaferrea.id.11350	rs11752532	G	C	-0.122	0.028	6.6e-06
genus.CandidatusSoleaferrea.id.11350	rs117412830	G	A	-0.122	0.028	6.4e-06
genus.CandidatusSoleaferrea.id.11350	rs7767882	A	C	-0.122	0.028	6.35e-06
genus.CandidatusSoleaferrea.id.11350	rs6426133	A	G	0.104	0.023	6.27e-06
genus.CandidatusSoleaferrea.id.11350	rs6568555	G	A	-0.123	0.028	6.16e-06
genus.CandidatusSoleaferrea.id.11350	rs9973954	A	G	0.089	0.02	5.95e-06
genus.CandidatusSoleaferrea.id.11350	rs12374597	G	A	-0.122	0.028	5.87e-06
genus.CandidatusSoleaferrea.id.11350	rs6494306	A	G	-0.097	0.021	5.8e-06
genus.CandidatusSoleaferrea.id.11350	rs36160691	G	A	0.104	0.024	5.73e-06
genus.CandidatusSoleaferrea.id.11350	rs256867	C	G	0.1	0.022	5.63e-06
genus.CandidatusSoleaferrea.id.11350	rs4678258	T	C	0.099	0.022	5.53e-06
genus.CandidatusSoleaferrea.id.11350	rs113393759	T	C	-0.123	0.028	5.48e-06
genus.CandidatusSoleaferrea.id.11350	rs10809135	T	C	0.083	0.018	5.47e-06
genus.CandidatusSoleaferrea.id.11350	rs36155147	C	T	0.105	0.024	5.41e-06
genus.CandidatusSoleaferrea.id.11350	rs7765732	C	A	-0.123	0.028	5.1e-06
genus.CandidatusSoleaferrea.id.11350	rs7766248	T	C	-0.123	0.028	5.07e-06
genus.CandidatusSoleaferrea.id.11350	rs11153159	G	C	-0.128	0.029	4.42e-06
genus.CandidatusSoleaferrea.id.11350	rs10090365	A	G	-0.083	0.018	4.17e-06
genus.CandidatusSoleaferrea.id.11350	rs10108780	A	G	-0.093	0.02	3.64e-06
genus.CandidatusSoleaferrea.id.11350	rs712066	T	C	0.107	0.023	3.22e-06
genus.CandidatusSoleaferrea.id.11350	rs712065	C	T	0.109	0.023	2.91e-06
genus.CandidatusSoleaferrea.id.11350	rs791504	A	T	0.108	0.023	2.64e-06
genus.CandidatusSoleaferrea.id.11350	rs12566578	A	T	0.108	0.023	2.46e-06
genus.CandidatusSoleaferrea.id.11350	rs6665956	A	T	0.11	0.023	2.4e-06
genus.CandidatusSoleaferrea.id.11350	rs1891244	T	A	0.111	0.023	1.72e-06
genus.CandidatusSoleaferrea.id.11350	rs4653589	G	A	0.11	0.023	1.66e-06
genus.CandidatusSoleaferrea.id.11350	rs61825792	T	C	0.112	0.023	1.37e-06
genus.CandidatusSoleaferrea.id.11350	rs4294381	T	C	0.112	0.023	1.37e-06
genus.Catenibacterium.id.2153	rs56327358	A	G	0.126	0.029	9e-06
genus.Catenibacterium.id.2153	rs7795142	T	G	0.127	0.028	8.34e-06
genus.Catenibacterium.id.2153	rs73117447	T	G	0.126	0.028	8.32e-06
genus.Catenibacterium.id.2153	rs212395	T	G	-0.133	0.029	6.69e-06
genus.Catenibacterium.id.2153	rs212388	C	T	-0.116	0.025	5.89e-06
genus.Catenibacterium.id.2153	rs7742829	C	T	0.114	0.025	5.61e-06
genus.Catenibacterium.id.2153	rs629326	G	T	-0.117	0.025	5.45e-06
genus.Catenibacterium.id.2153	rs73128290	A	G	0.13	0.028	4.29e-06
genus.Catenibacterium.id.2153	rs77285108	G	A	-0.162	0.035	3.63e-06
genus.Catenibacterium.id.2153	rs212393	G	A	-0.135	0.029	3.62e-06
genus.Catenibacterium.id.2153	rs12404911	C	T	0.141	0.03	2.8e-06
genus.ChristensenellaceaeR.7group.id.11283	rs7343112	T	C	0.049	0.011	9.99e-06
genus.ChristensenellaceaeR.7group.id.11283	rs2188618	T	A	0.049	0.011	9.83e-06
genus.ChristensenellaceaeR.7group.id.11283	rs11881855	A	G	0.055	0.012	9.82e-06
genus.ChristensenellaceaeR.7group.id.11283	rs12983481	C	T	0.055	0.012	9.79e-06
genus.ChristensenellaceaeR.7group.id.11283	rs62467076	G	A	0.109	0.025	9.47e-06
genus.ChristensenellaceaeR.7group.id.11283	rs79150079	C	A	0.122	0.027	9.42e-06
genus.ChristensenellaceaeR.7group.id.11283	rs16870208	T	C	0.11	0.025	9.14e-06
genus.ChristensenellaceaeR.7group.id.11283	rs62467084	C	T	0.109	0.025	9.1e-06
genus.ChristensenellaceaeR.7group.id.11283	rs62467085	A	C	0.109	0.025	9.1e-06
genus.ChristensenellaceaeR.7group.id.11283	rs17141339	G	A	0.109	0.025	9e-06
genus.ChristensenellaceaeR.7group.id.11283	rs62467082	T	C	0.109	0.025	9e-06
genus.ChristensenellaceaeR.7group.id.11283	rs10425605	C	T	0.049	0.011	8.83e-06
genus.ChristensenellaceaeR.7group.id.11283	rs62190261	A	C	0.096	0.021	8.74e-06
genus.ChristensenellaceaeR.7group.id.11283	rs62467090	G	A	0.109	0.025	8.74e-06
genus.ChristensenellaceaeR.7group.id.11283	rs2188617	C	T	0.049	0.011	8.57e-06
genus.ChristensenellaceaeR.7group.id.11283	rs62467072	T	C	0.11	0.025	8.55e-06
genus.ChristensenellaceaeR.7group.id.11283	rs12374987	T	C	0.11	0.025	8.51e-06
genus.ChristensenellaceaeR.7group.id.11283	rs73952017	C	T	-0.086	0.019	8.46e-06
genus.ChristensenellaceaeR.7group.id.11283	rs62467071	T	C	0.111	0.025	8.33e-06
genus.ChristensenellaceaeR.7group.id.11283	rs4805124	C	G	0.049	0.011	8.27e-06
genus.ChristensenellaceaeR.7group.id.11283	rs10487398	C	T	0.111	0.025	8.06e-06
genus.ChristensenellaceaeR.7group.id.11283	rs17141346	T	C	0.11	0.025	7.58e-06
genus.ChristensenellaceaeR.7group.id.11283	rs62467070	C	T	0.111	0.025	7.34e-06
genus.ChristensenellaceaeR.7group.id.11283	rs60954665	T	G	0.05	0.011	7.13e-06
genus.ChristensenellaceaeR.7group.id.11283	rs62467083	T	C	0.111	0.025	7.09e-06
genus.ChristensenellaceaeR.7group.id.11283	rs10487399	C	T	0.111	0.025	6.68e-06
genus.ChristensenellaceaeR.7group.id.11283	rs62467069	C	T	0.112	0.025	6.57e-06
genus.ChristensenellaceaeR.7group.id.11283	rs10461257	A	G	-0.055	0.012	6.51e-06
genus.ChristensenellaceaeR.7group.id.11283	rs1971264	A	G	0.124	0.027	6.25e-06
genus.ChristensenellaceaeR.7group.id.11283	rs62132810	A	G	-0.083	0.018	5.67e-06
genus.ChristensenellaceaeR.7group.id.11283	rs78521377	C	T	0.125	0.027	5.61e-06
genus.ChristensenellaceaeR.7group.id.11283	rs62468811	A	G	0.13	0.029	5.47e-06
genus.ChristensenellaceaeR.7group.id.11283	rs78024454	T	A	0.112	0.025	4.39e-06
genus.ChristensenellaceaeR.7group.id.11283	rs892686	A	G	0.051	0.011	3.97e-06
genus.ChristensenellaceaeR.7group.id.11283	rs8100274	C	T	0.054	0.012	3.46e-06
genus.ChristensenellaceaeR.7group.id.11283	rs8110494	A	C	0.054	0.012	3.45e-06
genus.ChristensenellaceaeR.7group.id.11283	rs10401160	T	C	0.054	0.012	3.44e-06
genus.ChristensenellaceaeR.7group.id.11283	rs7250370	A	C	0.054	0.012	3.42e-06
genus.ChristensenellaceaeR.7group.id.11283	rs8103090	G	T	0.054	0.012	3.4e-06
genus.ChristensenellaceaeR.7group.id.11283	rs7250563	C	T	0.054	0.012	3.36e-06
genus.ChristensenellaceaeR.7group.id.11283	rs17081797	A	G	-0.09	0.02	3.34e-06
genus.ChristensenellaceaeR.7group.id.11283	rs8111067	G	A	0.054	0.012	3.32e-06
genus.ChristensenellaceaeR.7group.id.11283	rs62467127	C	T	0.114	0.025	3.25e-06
genus.ChristensenellaceaeR.7group.id.11283	rs10412719	T	C	0.054	0.012	3.2e-06
genus.ChristensenellaceaeR.7group.id.11283	rs10412550	T	C	0.054	0.012	2.81e-06
genus.ChristensenellaceaeR.7group.id.11283	rs4419165	T	C	0.054	0.012	2.61e-06
genus.ChristensenellaceaeR.7group.id.11283	rs1812306	A	C	0.054	0.012	2.6e-06
genus.ChristensenellaceaeR.7group.id.11283	rs4413087	A	G	0.054	0.012	2.6e-06
genus.ChristensenellaceaeR.7group.id.11283	rs10426071	A	G	0.054	0.012	2.57e-06
genus.ChristensenellaceaeR.7group.id.11283	rs8182625	A	G	0.054	0.012	2.54e-06
genus.ChristensenellaceaeR.7group.id.11283	rs8107807	C	T	0.055	0.012	2.37e-06
genus.ChristensenellaceaeR.7group.id.11283	rs1812308	C	T	0.055	0.012	2.33e-06
genus.ChristensenellaceaeR.7group.id.11283	rs4805044	A	G	0.055	0.012	2.3e-06
genus.ChristensenellaceaeR.7group.id.11283	rs8106037	G	C	0.055	0.012	2.21e-06
genus.ChristensenellaceaeR.7group.id.11283	rs1107331	G	A	0.055	0.012	2.04e-06
genus.ChristensenellaceaeR.7group.id.11283	rs10420576	C	T	0.055	0.012	1.96e-06
genus.ChristensenellaceaeR.7group.id.11283	rs4805045	C	T	0.055	0.012	1.71e-06
genus.ChristensenellaceaeR.7group.id.11283	rs9304850	G	A	0.056	0.012	1.37e-06
genus.ChristensenellaceaeR.7group.id.11283	rs1812307	A	G	0.057	0.012	1.17e-06
genus.ChristensenellaceaeR.7group.id.11283	rs6510389	A		0.057	0.012	1.04e-06
genus.ChristensenellaceaeR.7group.id.11283	rs10423276	T	C	0.057	0.012	1.02e-06
genus.ChristensenellaceaeR.7group.id.11283	rs8110909	G	A	0.058	0.012	8.75e-07
genus.ChristensenellaceaeR.7group.id.11283	rs999354	T	A	0.058	0.012	7.01e-07
genus.Clostridiuminnocuumgroup.id.14397	rs10506058	A	G	0.1	0.022	8.92e-06
genus.Clostridiuminnocuumgroup.id.14397	rs40656	C	T	0.143	0.031	8.62e-06
genus.Clostridiuminnocuumgroup.id.14397	rs77845139	A	G	-0.115	0.026	8.41e-06
genus.Clostridiuminnocuumgroup.id.14397	rs6577484	G	A	0.16	0.036	8.41e-06
genus.Clostridiuminnocuumgroup.id.14397	rs57004694	C	T	0.144	0.032	8.26e-06
genus.Clostridiuminnocuumgroup.id.14397	rs67260757	C	T	0.145	0.032	7.99e-06
genus.Clostridiuminnocuumgroup.id.14397	rs11662417	G	C	0.145	0.032	7.98e-06
genus.Clostridiuminnocuumgroup.id.14397	rs7235290	A	G	0.147	0.033	7.92e-06
genus.Clostridiuminnocuumgroup.id.14397	rs66960257	C	T	0.145	0.032	7.91e-06
genus.Clostridiuminnocuumgroup.id.14397	rs71564433	T	A	-0.127	0.027	7.8e-06
genus.Clostridiuminnocuumgroup.id.14397	rs75448022	A	G	0.149	0.033	7.57e-06
genus.Clostridiuminnocuumgroup.id.14397	rs4869133	G	A	-0.181	0.041	7.24e-06
genus.Clostridiuminnocuumgroup.id.14397	rs11875989	A	C	0.145	0.032	7.21e-06
genus.Clostridiuminnocuumgroup.id.14397	rs59596655	T	G	0.147	0.033	7e-06
genus.Clostridiuminnocuumgroup.id.14397	rs10074000	T	C	-0.103	0.023	7e-06
genus.Clostridiuminnocuumgroup.id.14397	rs67307009	G	A	0.146	0.032	7e-06
genus.Clostridiuminnocuumgroup.id.14397	rs11661723	T	A	0.147	0.033	6.87e-06
genus.Clostridiuminnocuumgroup.id.14397	rs61277346	C	T	0.146	0.032	6.73e-06
genus.Clostridiuminnocuumgroup.id.14397	rs56367012	G	A	0.146	0.032	6.5e-06
genus.Clostridiuminnocuumgroup.id.14397	rs8096953	C	T	0.146	0.032	6.48e-06
genus.Clostridiuminnocuumgroup.id.14397	rs9831905	T	C	-0.106	0.023	6.41e-06
genus.Clostridiuminnocuumgroup.id.14397	rs11878088	C	T	0.146	0.032	6.34e-06
genus.Clostridiuminnocuumgroup.id.14397	rs72864816	T	G	0.15	0.033	5.96e-06
genus.Clostridiuminnocuumgroup.id.14397	rs57676887	C	T	0.147	0.032	5.84e-06
genus.Clostridiuminnocuumgroup.id.14397	rs61267978	T	C	0.147	0.032	5.59e-06
genus.Clostridiuminnocuumgroup.id.14397	rs1942371	G	A	-0.158	0.034	4.06e-06
genus.Clostridiuminnocuumgroup.id.14397	rs1948423	T	A	-0.109	0.023	3.49e-06
genus.Clostridiuminnocuumgroup.id.14397	rs6884406	A	G	0.112	0.023	1.44e-06
genus.Clostridiuminnocuumgroup.id.14397	rs6890185	T	C	0.113	0.023	1.12e-06
genus.Clostridiumsensustricto1.id.1873	rs10804492	T	C	-0.061	0.014	9.46e-06
genus.Clostridiumsensustricto1.id.1873	rs484861	A	G	-0.073	0.017	9.33e-06
genus.Clostridiumsensustricto1.id.1873	rs11586026	A	T	0.111	0.025	8.85e-06
genus.Clostridiumsensustricto1.id.1873	rs118086821	T	C	0.107	0.025	8.15e-06
genus.Clostridiumsensustricto1.id.1873	rs11264403	G	A	-0.139	0.033	7.76e-06
genus.Clostridiumsensustricto1.id.1873	rs12490337	C	G	-0.062	0.014	7.49e-06
genus.Clostridiumsensustricto1.id.1873	rs531166	T	C	-0.074	0.017	5.97e-06
genus.Clostridiumsensustricto1.id.1873	rs876740	T	C	0.055	0.012	5.83e-06
genus.Clostridiumsensustricto1.id.1873	rs146962933	A	G	0.109	0.025	5.63e-06
genus.Clostridiumsensustricto1.id.1873	rs11181871	C	T	0.109	0.025	5.36e-06
genus.Clostridiumsensustricto1.id.1873	rs12341505	G	A	0.081	0.018	4.82e-06
genus.Clostridiumsensustricto1.id.1873	rs116847295	C	T	0.11	0.025	4.58e-06
genus.Clostridiumsensustricto1.id.1873	rs115807074	A	G	-0.227	0.049	4.32e-06
genus.Clostridiumsensustricto1.id.1873	rs941434	A	C	-0.183	0.039	3.22e-06
genus.Clostridiumsensustricto1.id.1873	rs6934446	A	G	-0.076	0.017	3.21e-06
genus.Clostridiumsensustricto1.id.1873	rs2817172	C	T	0.058	0.012	2.77e-06
genus.Clostridiumsensustricto1.id.1873	rs2795528	G	A	-0.184	0.039	2.72e-06
genus.Clostridiumsensustricto1.id.1873	rs550843	T	C	-0.078	0.017	2.05e-06
genus.Collinsella.id.815	rs2660968	G	A	0.067	0.015	9.68e-06
genus.Collinsella.id.815	rs11597285	G	T	-0.054	0.012	9.38e-06
genus.Collinsella.id.815	rs59414781	C	G	0.067	0.015	9.15e-06
genus.Collinsella.id.815	rs11600657	T	G	-0.053	0.012	8.95e-06
genus.Collinsella.id.815	rs2831291	A	G	0.074	0.017	8.59e-06
genus.Collinsella.id.815	rs73068166	G	T	-0.103	0.024	8.58e-06
genus.Collinsella.id.815	rs548708	T	C	0.054	0.012	8.4e-06
genus.Collinsella.id.815	rs62102630	A	G	-0.07	0.015	8.31e-06
genus.Collinsella.id.815	rs12921100	A	T	0.056	0.013	8.23e-06
genus.Collinsella.id.815	rs7102347	C	A	-0.053	0.012	7.61e-06
genus.Collinsella.id.815	rs149807560	C	A	-0.104	0.024	7.1e-06
genus.Collinsella.id.815	rs4753793	A	T	-0.054	0.012	7.03e-06
genus.Collinsella.id.815	rs62448870	G	A	-0.054	0.012	6.9e-06
genus.Collinsella.id.815	rs62448869	T	A	-0.054	0.012	6.82e-06
genus.Collinsella.id.815	rs62448871	C	A	-0.054	0.012	6.78e-06
genus.Collinsella.id.815	rs1496626	T	C	-0.072	0.016	6.78e-06
genus.Collinsella.id.815	rs11212094	T	C	-0.054	0.012	6.76e-06
genus.Collinsella.id.815	rs2094864	T	G	0.074	0.017	6.61e-06
genus.Collinsella.id.815	rs10890671	T	C	-0.054	0.012	6.52e-06
genus.Collinsella.id.815	rs75672793	A	G	-0.109	0.024	6.14e-06
genus.Collinsella.id.815	rs7283749	T	C	0.076	0.017	4.48e-06
genus.Collinsella.id.815	rs2103510	G	A	0.079	0.017	2.42e-06
genus.Collinsella.id.815	rs2671662	C	G	-0.057	0.012	2.22e-06
genus.Collinsella.id.815	rs73052258	G	A	0.093	0.02	1.72e-06
genus.Collinsella.id.815	rs9541268	C	A	0.096	0.02	8.79e-07
genus.Coprobacter.id.949	rs28402691	T	C	0.111	0.025	9.56e-06
genus.Coprobacter.id.949	rs11073941	C	G	0.097	0.022	9.44e-06
genus.Coprobacter.id.949	rs9972482	T	A	0.097	0.022	9.24e-06
genus.Coprobacter.id.949	rs8041597	G	T	0.097	0.022	9.14e-06
genus.Coprobacter.id.949	rs76001613	C	G	0.216	0.049	9.13e-06
genus.Coprobacter.id.949	rs4932361	G	A	0.098	0.022	9.1e-06
genus.Coprobacter.id.949	rs12908296	A	G	0.101	0.022	9.04e-06
genus.Coprobacter.id.949	rs62025078	G	T	0.099	0.022	8.98e-06
genus.Coprobacter.id.949	rs12231438	T	G	-0.102	0.023	8.9e-06
genus.Coprobacter.id.949	rs7163000	T	C	0.098	0.022	8.68e-06
genus.Coprobacter.id.949	rs6496711	C	T	0.098	0.022	8.44e-06
genus.Coprobacter.id.949	rs10852138	C	A	0.098	0.022	8.36e-06
genus.Coprobacter.id.949	rs6496712	G	T	0.088	0.02	8.31e-06
genus.Coprobacter.id.949	rs1927591	A	T	0.078	0.017	8.11e-06
genus.Coprobacter.id.949	rs12996055	A	C	0.092	0.021	8.08e-06
genus.Coprobacter.id.949	rs11073942	T	C	0.098	0.022	7.92e-06
genus.Coprobacter.id.949	rs7679813	A	C	-0.183	0.04	7.45e-06
genus.Coprobacter.id.949	rs5011651	G	A	0.089	0.02	7.43e-06
genus.Coprobacter.id.949	rs182453737	T	A	0.124	0.028	7.32e-06
genus.Coprobacter.id.949	rs56691857	C	A	-0.183	0.04	7.25e-06
genus.Coprobacter.id.949	rs6496714	C	T	0.099	0.022	6.93e-06
genus.Coprobacter.id.949	rs6496717	C	T	0.089	0.02	6.75e-06
genus.Coprobacter.id.949	rs189356	G	A	0.078	0.017	6.26e-06
genus.Coprobacter.id.949	rs12684609	T	C	0.101	0.022	6.1e-06
genus.Coprobacter.id.949	rs77575394	T	C	0.246	0.054	5.96e-06
genus.Coprobacter.id.949	rs74919520	G	A	0.126	0.028	5.76e-06
genus.Coprobacter.id.949	rs11532348	C	T	-0.104	0.023	5.71e-06
genus.Coprobacter.id.949	rs5011652	G	C	0.09	0.02	5.51e-06
genus.Coprobacter.id.949	rs72821405	T	C	-0.147	0.032	4.76e-06
genus.Coprobacter.id.949	rs143662916	C	T	0.253	0.054	3.07e-06
genus.Coprobacter.id.949	rs3828477	G	T	-0.091	0.02	2.89e-06
genus.Coprobacter.id.949	rs55672356	T	A	-0.193	0.041	2.74e-06
genus.Coprobacter.id.949	rs213863	C	T	-0.089	0.019	2.35e-06
genus.Coprobacter.id.949	rs305411	A	G	0.129	0.026	1.01e-06
genus.Coprococcus1.id.11301	rs9351863	C	G	-0.049	0.011	9.78e-06
genus.Coprococcus1.id.11301	rs7774681	T	G	-0.049	0.011	9.12e-06
genus.Coprococcus1.id.11301	rs1519491	T	C	0.05	0.011	8.95e-06
genus.Coprococcus1.id.11301	rs7795435	G	C	-0.053	0.012	8.95e-06
genus.Coprococcus1.id.11301	rs946513	C	T	0.206	0.046	8.62e-06
genus.Coprococcus1.id.11301	rs73167075	T	C	0.057	0.013	8.57e-06
genus.Coprococcus1.id.11301	rs7795598	G	A	-0.054	0.012	8.53e-06
genus.Coprococcus1.id.11301	rs9360500	A	C	-0.049	0.011	8.51e-06
genus.Coprococcus1.id.11301	rs12192614	T	A	-0.049	0.011	8.02e-06
genus.Coprococcus1.id.11301	rs1762123	C	T	-0.089	0.02	8.01e-06
genus.Coprococcus1.id.11301	rs12886051	G	C	-0.052	0.012	8.01e-06
genus.Coprococcus1.id.11301	rs1590791	C	T	-0.049	0.011	7.87e-06
genus.Coprococcus1.id.11301	rs2907920	A	G	0.056	0.013	7.65e-06
genus.Coprococcus1.id.11301	rs1932315	G	A	-0.049	0.011	7.57e-06
genus.Coprococcus1.id.11301	rs4519976	T	C	-0.049	0.011	6.79e-06
genus.Coprococcus1.id.11301	rs9342888	T	A	-0.049	0.011	6.78e-06
genus.Coprococcus1.id.11301	rs4330511	A	G	-0.049	0.011	6.71e-06
genus.Coprococcus1.id.11301	rs9342887	G	T	-0.049	0.011	6.58e-06
genus.Coprococcus1.id.11301	rs7761439	C	T	-0.05	0.011	6.11e-06
genus.Coprococcus1.id.11301	rs12193787	C	T	-0.05	0.011	6.03e-06
genus.Coprococcus1.id.11301	rs62341982	G	C	-0.085	0.019	5.03e-06
genus.Coprococcus1.id.11301	rs62341981	G	A	-0.085	0.019	4.98e-06
genus.Coprococcus1.id.11301	rs12794898	G	T	0.09	0.02	4.92e-06
genus.Coprococcus1.id.11301	rs6084702	G	A	0.052	0.011	4.85e-06
genus.Coprococcus1.id.11301	rs7784490	C	G	-0.052	0.011	4.55e-06
genus.Coprococcus1.id.11301	rs10455249	A	G	-0.051	0.011	4.2e-06
genus.Coprococcus1.id.11301	rs1576241	A	G	-0.051	0.011	3.33e-06
genus.Coprococcus1.id.11301	rs73031725	T	C	0.168	0.036	1.98e-06
genus.Coprococcus1.id.11301	rs1010560	C	A	0.058	0.012	1.96e-06
genus.Coprococcus1.id.11301	rs56405618	A	G	-0.09	0.019	1.57e-06
genus.Coprococcus1.id.11301	rs489284	A	T	-0.053	0.011	1.51e-06
genus.Coprococcus1.id.11301	rs74101919	T	C	-0.072	0.014	1.03e-06
genus.Coprococcus1.id.11301	rs4277593	G	A	-0.059	0.011	1.14e-07
genus.Coprococcus2.id.11302	rs12634070	T	C	0.074	0.016	9.95e-06
genus.Coprococcus2.id.11302	rs6894272	T	C	-0.113	0.025	9.53e-06
genus.Coprococcus2.id.11302	rs67222397	C	G	0.069	0.016	9.39e-06
genus.Coprococcus2.id.11302	rs34042862	T	G	-0.065	0.015	9.34e-06
genus.Coprococcus2.id.11302	rs7266126	T	C	0.107	0.024	8.89e-06
genus.Coprococcus2.id.11302	rs6819699	T	C	-0.062	0.014	8.85e-06
genus.Coprococcus2.id.11302	rs11099043	A	T	0.064	0.014	8.6e-06
genus.Coprococcus2.id.11302	rs10121347	C	G	0.093	0.022	8.31e-06
genus.Coprococcus2.id.11302	rs35890118	A	G	-0.067	0.015	8.26e-06
genus.Coprococcus2.id.11302	rs67539765	A	G	0.069	0.016	7.71e-06
genus.Coprococcus2.id.11302	rs10070053	A	G	0.059	0.014	7.65e-06
genus.Coprococcus2.id.11302	rs9783625	A	C	-0.065	0.014	7.37e-06
genus.Coprococcus2.id.11302	rs7685943	A	G	0.072	0.016	6.8e-06
genus.Coprococcus2.id.11302	rs61823518	A	C	-0.096	0.022	6.68e-06
genus.Coprococcus2.id.11302	rs9426473	A	G	0.073	0.016	6.31e-06
genus.Coprococcus2.id.11302	rs4376165	C	T	-0.062	0.014	5.83e-06
genus.Coprococcus2.id.11302	rs1022078	C	T	0.065	0.014	5.5e-06
genus.Coprococcus2.id.11302	rs35916879	C	G	0.068	0.015	5.44e-06
genus.Coprococcus2.id.11302	rs13111161	C	G	-0.063	0.014	5.37e-06
genus.Coprococcus2.id.11302	rs13110934	A	G	-0.063	0.014	5.28e-06
genus.Coprococcus2.id.11302	rs73314336	G	A	-0.065	0.014	4.82e-06
genus.Coprococcus2.id.11302	rs2482516	C	T	0.075	0.016	4.72e-06
genus.Coprococcus2.id.11302	rs4904315	C	A	-0.066	0.014	4.44e-06
genus.Coprococcus2.id.11302	rs9323788	C	T	-0.066	0.014	4.12e-06
genus.Coprococcus2.id.11302	rs11734574	C	T	-0.063	0.014	4.07e-06
genus.Coprococcus2.id.11302	rs35327820	A	C	-0.064	0.014	3.39e-06
genus.Coprococcus2.id.11302	rs11159771	C	A	-0.067	0.014	3.36e-06
genus.Coprococcus2.id.11302	rs2391605	A	G	-0.064	0.014	2.8e-06
genus.Coprococcus2.id.11302	rs72680320	T	C	-0.065	0.014	2.27e-06
genus.Coprococcus2.id.11302	rs2426193	C	G	0.113	0.023	2.16e-06
genus.Coprococcus2.id.11302	rs6012988	C	G	0.111	0.023	1.63e-06
genus.Coprococcus2.id.11302	rs1958519	T	A	0.067	0.014	1.58e-06
genus.Coprococcus2.id.11302	rs6677933	C	T	-0.08	0.016	1.19e-06
genus.Coprococcus2.id.11302	rs59936925	A	T	0.117	0.023	9.38e-07
genus.Coprococcus3.id.11303	rs2001666	C	G	-0.065	0.015	9.73e-06
genus.Coprococcus3.id.11303	rs56112306	A	G	0.055	0.012	9.7e-06
genus.Coprococcus3.id.11303	rs11077359	T	C	-0.065	0.015	9.64e-06
genus.Coprococcus3.id.11303	rs10265310	A	T	0.059	0.013	9.57e-06
genus.Coprococcus3.id.11303	rs9655998	T	G	0.051	0.011	9.4e-06
genus.Coprococcus3.id.11303	rs10810043	A	G	0.052	0.012	9.27e-06
genus.Coprococcus3.id.11303	rs38665	C	T	-0.051	0.011	8.66e-06
genus.Coprococcus3.id.11303	rs6995587	A	T	0.055	0.012	8.24e-06
genus.Coprococcus3.id.11303	rs58719470	G	A	-0.063	0.014	7.92e-06
genus.Coprococcus3.id.11303	rs6994742	C	T	0.055	0.012	7.84e-06
genus.Coprococcus3.id.11303	rs34731438	T	G	-0.063	0.014	7.71e-06
genus.Coprococcus3.id.11303	rs13390956	G	A	-0.07	0.015	7.5e-06
genus.Coprococcus3.id.11303	rs13247359	G	A	0.051	0.011	7.33e-06
genus.Coprococcus3.id.11303	rs4575475	G	A	0.062	0.014	7.04e-06
genus.Coprococcus3.id.11303	rs4368354	A	G	-0.07	0.015	7.02e-06
genus.Coprococcus3.id.11303	rs13393804	C	T	-0.069	0.015	6.26e-06
genus.Coprococcus3.id.11303	rs13385714	T	C	-0.069	0.015	6.13e-06
genus.Coprococcus3.id.11303	rs78686130	T	C	-0.056	0.012	5.84e-06
genus.Coprococcus3.id.11303	rs9941669	T	C	-0.067	0.015	5.6e-06
genus.Coprococcus3.id.11303	rs10206264	A	G	-0.07	0.015	4.97e-06
genus.Coprococcus3.id.11303	rs11080344	C	T	0.052	0.011	4.79e-06
genus.Coprococcus3.id.11303	rs7521171	G	A	-0.06	0.013	4.32e-06
genus.Coprococcus3.id.11303	rs11681779	T	C	-0.069	0.015	4.1e-06
genus.Coprococcus3.id.11303	rs13394391	C	T	-0.071	0.015	2.2e-06
genus.Coprococcus3.id.11303	rs178271	T	C	0.145	0.029	7.81e-07
genus.Coprococcus3.id.11303	rs62481985	G	C	-0.058	0.012	4.18e-07
genus.Coprococcus3.id.11303	rs8100692	T	C	0.058	0.011	4.16e-07
genus.DefluviitaleaceaeUCG011.id.11287	rs35251672	T	G	0.079	0.018	9.71e-06
genus.DefluviitaleaceaeUCG011.id.11287	rs77041875	T	C	0.082	0.018	9.08e-06
genus.DefluviitaleaceaeUCG011.id.11287	rs6952956	T	C	-0.108	0.024	8.66e-06
genus.DefluviitaleaceaeUCG011.id.11287	rs2892880	G	A	0.082	0.018	6.83e-06
genus.DefluviitaleaceaeUCG011.id.11287	rs28696126	A	T	-0.107	0.024	6.63e-06
genus.DefluviitaleaceaeUCG011.id.11287	rs73217031	T	C	0.166	0.036	4.91e-06
genus.DefluviitaleaceaeUCG011.id.11287	rs4344384	G	T	0.072	0.016	4.83e-06
genus.DefluviitaleaceaeUCG011.id.11287	rs12122999	G	T	-0.083	0.018	4.83e-06
genus.DefluviitaleaceaeUCG011.id.11287	rs9725395	A	G	-0.138	0.03	3.52e-06
genus.DefluviitaleaceaeUCG011.id.11287	rs9608282	T	G	0.143	0.03	2.52e-06
genus.DefluviitaleaceaeUCG011.id.11287	rs2357084	T	A	-0.108	0.022	2.16e-06
genus.DefluviitaleaceaeUCG011.id.11287	rs55658617	T	C	0.174	0.036	2.15e-06
genus.DefluviitaleaceaeUCG011.id.11287	rs1582238	T	C	0.081	0.017	1.57e-06
genus.DefluviitaleaceaeUCG011.id.11287	rs12500663	T	G	-0.115	0.023	1.51e-06
genus.DefluviitaleaceaeUCG011.id.11287	rs112893842	T	C	0.114	0.023	1.45e-06
genus.DefluviitaleaceaeUCG011.id.11287	rs12501518	G	A	-0.11	0.022	1.4e-06
genus.DefluviitaleaceaeUCG011.id.11287	rs2357086	T	C	-0.11	0.022	1.33e-06
genus.DefluviitaleaceaeUCG011.id.11287	rs4677103	A	G	0.098	0.02	9.6e-07
genus.DefluviitaleaceaeUCG011.id.11287	rs72731813	C	T	-0.147	0.029	4.33e-07
genus.Desulfovibrio.id.3173	rs7729080	C	A	-0.07	0.016	9.96e-06
genus.Desulfovibrio.id.3173	rs7580530	C	T	0.099	0.022	9.37e-06
genus.Desulfovibrio.id.3173	rs2032031	A	G	-0.065	0.015	9.14e-06
genus.Desulfovibrio.id.3173	rs11902332	G	A	0.099	0.022	9.11e-06
genus.Desulfovibrio.id.3173	rs6758756	T	C	0.101	0.023	8.94e-06
genus.Desulfovibrio.id.3173	rs35710712	C	T	0.099	0.022	8.79e-06
genus.Desulfovibrio.id.3173	rs72647089	T	G	-0.107	0.024	8.3e-06
genus.Desulfovibrio.id.3173	rs1294544	A	C	0.069	0.015	7.78e-06
genus.Desulfovibrio.id.3173	rs746985	T	C	-0.067	0.015	7.33e-06
genus.Desulfovibrio.id.3173	rs1119400	C	T	-0.066	0.015	6.91e-06
genus.Desulfovibrio.id.3173	rs2590913	G	A	0.154	0.034	6.65e-06
genus.Desulfovibrio.id.3173	rs12031543	T	C	-0.127	0.028	6.55e-06
genus.Desulfovibrio.id.3173	rs9851810	G	A	0.117	0.025	5.64e-06
genus.Desulfovibrio.id.3173	rs4797774	G	A	0.213	0.047	5.64e-06
genus.Desulfovibrio.id.3173	rs6580353	T	C	0.077	0.017	4.94e-06
genus.Desulfovibrio.id.3173	rs13066142	G	A	0.119	0.025	3.79e-06
genus.Desulfovibrio.id.3173	rs10129801	T	C	-0.069	0.015	2.82e-06
genus.Desulfovibrio.id.3173	rs11160353	T	A	-0.069	0.015	2.7e-06
genus.Desulfovibrio.id.3173	rs2853180	A	T	0.092	0.02	2.48e-06
genus.Desulfovibrio.id.3173	rs2853179	C	T	0.081	0.017	2.42e-06
genus.Desulfovibrio.id.3173	rs6750821	C	T	0.106	0.022	2.18e-06
genus.Desulfovibrio.id.3173	rs16863365	A	G	0.109	0.023	1.79e-06
genus.Dialister.id.2183	rs4725397	T	C	0.065	0.015	9.71e-06
genus.Dialister.id.2183	rs764177	C	A	-0.06	0.014	9.61e-06
genus.Dialister.id.2183	rs6575890	T	C	-0.112	0.026	9.58e-06
genus.Dialister.id.2183	rs7131542	A	G	0.101	0.023	9.48e-06
genus.Dialister.id.2183	rs75416973	A	G	0.073	0.016	9.46e-06
genus.Dialister.id.2183	rs57053627	G	A	0.065	0.015	9.37e-06
[truncated: 5,123 more rows]
