# Supplementary material for: Investigating causal associations among gut microbiota, gut microbiota-derived metabolites, and gestational diabetes mellitus: a bidirectional Mendelian randomization study
Source: Aging (Albany NY). 2023 Aug 23;15(16):8345–66. doi: 10.18632/aging.204973 (PMC10497006; doi:10.18632/aging.204973)
Supplement: Supplementary Table 2 [file aging-15-204973-s003.xlsx]

## Sheet: Table S2
Supplementary Table 2. Genome-wide significant and independent SNPs that were used as instruments for gut metabolites.
Trait	SNPs	Effect Allele	Other Allele	β	Standard Error	P value
2-aminobutyrate	rs17606458	A	C	0.0077	0.0017	9.93e-06
2-aminobutyrate	rs1269621	A	G	-0.0078	0.0018	9.8e-06
2-aminobutyrate	rs2047601	A	G	0.0078	0.0018	9.77e-06
2-aminobutyrate	rs582207	T	C	0.0078	0.0018	9.71e-06
2-aminobutyrate	rs2436152	A	G	-0.0078	0.0018	9.69e-06
2-aminobutyrate	rs633191	T	C	0.0078	0.0018	9.66e-06
2-aminobutyrate	rs2290101	C	G	0.0105	0.0024	9.64e-06
2-aminobutyrate	rs8046716	T	C	-0.0079	0.0018	9.6e-06
2-aminobutyrate	rs1613047	A	G	-0.0078	0.0018	9.44e-06
2-aminobutyrate	rs2853187	A	T	-0.0078	0.0018	9.42e-06
2-aminobutyrate	rs220835	A	G	-0.0079	0.0018	9.4e-06
2-aminobutyrate	rs879138	C	G	0.0079	0.0018	9.3e-06
2-aminobutyrate	rs11001345	A	G	0.0119	0.0027	9.21e-06
2-aminobutyrate	rs17171012	A	C	0.0233	0.0053	9.08e-06
2-aminobutyrate	rs6970514	A	G	-0.0233	0.0053	9.02e-06
2-aminobutyrate	rs6844227	T	C	-0.0078	0.0018	9.02e-06
2-aminobutyrate	rs506718	A	T	-0.0078	0.0018	8.99e-06
2-aminobutyrate	rs754410	A	G	-0.0079	0.0018	8.78e-06
2-aminobutyrate	rs11215584	A	G	0.0079	0.0018	8.77e-06
2-aminobutyrate	rs4685337	T	C	-0.0078	0.0018	8.64e-06
2-aminobutyrate	rs860354	A	T	-0.0079	0.0018	8.35e-06
2-aminobutyrate	rs12714707	A	C	0.0078	0.0018	8.32e-06
2-aminobutyrate	rs11713801	A	G	-0.0078	0.0018	8.32e-06
2-aminobutyrate	rs7652181	A	G	0.0078	0.0018	8.32e-06
2-aminobutyrate	rs2291702	T	C	-0.0078	0.0017	8.16e-06
2-aminobutyrate	rs4140738	A	G	0.0143	0.0032	7.98e-06
2-aminobutyrate	rs10941228	C	G	-0.0078	0.0017	7.95e-06
2-aminobutyrate	rs7522303	A	T	-0.0079	0.0018	7.91e-06
2-aminobutyrate	rs7286668	A	C	-0.0113	0.0025	7.86e-06
2-aminobutyrate	rs6425496	T	C	-0.0079	0.0018	7.82e-06
2-aminobutyrate	rs558426	C	G	0.0078	0.0018	7.74e-06
2-aminobutyrate	rs1319775	T	C	-0.0078	0.0018	7.72e-06
2-aminobutyrate	rs935622	A	G	0.0078	0.0018	7.56e-06
2-aminobutyrate	rs959645	T	C	-0.0078	0.0018	7.51e-06
2-aminobutyrate	rs2291699	A	G	0.0079	0.0018	7.24e-06
2-aminobutyrate	rs553935	A	G	0.0079	0.0018	7.23e-06
2-aminobutyrate	rs531531	C	G	0.0079	0.0018	7.21e-06
2-aminobutyrate	rs7163817	T	C	0.008	0.0018	7.12e-06
2-aminobutyrate	rs2497138	A	C	0.0146	0.0032	7.09e-06
2-aminobutyrate	rs11242200	A	G	0.0117	0.0026	7.07e-06
2-aminobutyrate	rs2651929	T	C	-0.008	0.0018	7.04e-06
2-aminobutyrate	rs1448551	A	T	0.0079	0.0018	6.89e-06
2-aminobutyrate	rs9835277	C	G	0.0079	0.0018	6.89e-06
2-aminobutyrate	rs2230532	T	C	0.009	0.002	6.8e-06
2-aminobutyrate	rs7957100	T	C	0.0079	0.0018	6.71e-06
2-aminobutyrate	rs6720363	T	G	0.0142	0.0031	6.7e-06
2-aminobutyrate	rs12230817	A	T	0.008	0.0018	6.53e-06
2-aminobutyrate	rs7582468	A	C	0.0079	0.0018	6.52e-06
2-aminobutyrate	rs10516806	T	G	0.0105	0.0023	6.5e-06
2-aminobutyrate	rs11957499	T	C	-0.0118	0.0026	6.22e-06
2-aminobutyrate	rs9449802	T	C	-0.0187	0.0041	6.22e-06
2-aminobutyrate	rs1504443	T	C	0.0079	0.0018	6.13e-06
2-aminobutyrate	rs10189501	A	G	0.008	0.0018	6.04e-06
2-aminobutyrate	rs533209	T	C	-0.0079	0.0018	6.03e-06
2-aminobutyrate	rs1269634	A	G	0.0079	0.0018	5.98e-06
2-aminobutyrate	rs17101315	T	C	-0.0284	0.0063	5.95e-06
2-aminobutyrate	rs13013035	A	G	0.0145	0.0032	5.94e-06
2-aminobutyrate	rs13012644	T	C	0.0145	0.0032	5.93e-06
2-aminobutyrate	rs7113167	T	C	-0.0079	0.0018	5.85e-06
2-aminobutyrate	rs10499574	T	C	0.008	0.0018	5.81e-06
2-aminobutyrate	rs4722590	A	C	0.008	0.0018	5.8e-06
2-aminobutyrate	rs10464319	T	C	0.008	0.0018	5.8e-06
2-aminobutyrate	rs10490210	A	G	0.0144	0.0032	5.76e-06
2-aminobutyrate	rs3907482	A	C	-0.0079	0.0017	5.67e-06
2-aminobutyrate	rs11742775	T	C	-0.0118	0.0026	5.65e-06
2-aminobutyrate	rs7973882	A	G	0.0079	0.0017	5.64e-06
2-aminobutyrate	rs12231312	T	C	0.0079	0.0017	5.62e-06
2-aminobutyrate	rs13032928	A	C	0.0145	0.0032	5.61e-06
2-aminobutyrate	rs13033058	A	G	0.0145	0.0032	5.6e-06
2-aminobutyrate	rs472415	C	G	0.008	0.0018	5.59e-06
2-aminobutyrate	rs505621	A	G	0.008	0.0018	5.52e-06
2-aminobutyrate	rs666845	T	C	-0.008	0.0018	5.52e-06
2-aminobutyrate	rs11233191	T	C	0.008	0.0018	5.31e-06
2-aminobutyrate	rs12228823	A	G	0.008	0.0018	5.31e-06
2-aminobutyrate	rs10501534	T	G	-0.008	0.0018	5.29e-06
2-aminobutyrate	rs13288466	T	C	-0.0157	0.0034	5.26e-06
2-aminobutyrate	rs758132	A	C	0.008	0.0018	5.18e-06
2-aminobutyrate	rs2497133	T	C	0.0167	0.0037	5.11e-06
2-aminobutyrate	rs11070998	T	C	-0.099	0.0217	4.87e-06
2-aminobutyrate	rs4900883	C	G	-0.0081	0.0018	4.7e-06
2-aminobutyrate	rs13027905	A	G	-0.0146	0.0032	4.66e-06
2-aminobutyrate	rs4758859	A	G	-0.008	0.0017	4.64e-06
2-aminobutyrate	rs2497132	C	G	-0.0173	0.0038	4.56e-06
2-aminobutyrate	rs1493325	T	C	0.008	0.0017	4.45e-06
2-aminobutyrate	rs17595325	T	C	-0.008	0.0017	4.45e-06
2-aminobutyrate	rs1001872	A	G	-0.0081	0.0018	4.32e-06
2-aminobutyrate	rs10506407	A	G	0.008	0.0017	4.27e-06
2-aminobutyrate	rs2364703	T	G	0.008	0.0017	4.27e-06
2-aminobutyrate	rs11173339	T	C	-0.008	0.0017	4.26e-06
2-aminobutyrate	rs11173336	A	G	-0.008	0.0017	4.25e-06
2-aminobutyrate	rs17665306	A	C	0.0081	0.0018	4.24e-06
2-aminobutyrate	rs6946785	A	G	0.0081	0.0018	4.2e-06
2-aminobutyrate	rs4562207	A	G	-0.0081	0.0018	4.18e-06
2-aminobutyrate	rs2497131	A	G	0.0179	0.0039	4.18e-06
2-aminobutyrate	rs1420424	A	G	0.0081	0.0018	4.17e-06
2-aminobutyrate	rs1420426	A	G	0.0081	0.0018	4.16e-06
2-aminobutyrate	rs17595367	A	G	-0.008	0.0017	4.07e-06
2-aminobutyrate	rs3732062	T	C	-0.0174	0.0038	4.05e-06
2-aminobutyrate	rs1334592	T	C	-0.0084	0.0018	4.01e-06
2-aminobutyrate	rs10506408	A	G	-0.008	0.0017	4.01e-06
2-aminobutyrate	rs7856243	A	T	0.0081	0.0018	4e-06
2-aminobutyrate	rs11173343	T	G	-0.008	0.0017	4e-06
2-aminobutyrate	rs9449776	T	C	0.0186	0.004	3.99e-06
2-aminobutyrate	rs10491285	A	G	-0.0082	0.0018	3.73e-06
2-aminobutyrate	rs11952145	A	G	-0.0121	0.0026	3.63e-06
2-aminobutyrate	rs11954900	T	C	0.012	0.0026	3.6e-06
2-aminobutyrate	rs6486771	T	C	-0.0082	0.0018	3.45e-06
2-aminobutyrate	rs1045649	T	C	0.019	0.0041	3.42e-06
2-aminobutyrate	rs9449777	T	G	0.0191	0.0041	3.32e-06
2-aminobutyrate	rs12473430	T	C	0.0081	0.0018	3.28e-06
2-aminobutyrate	rs934748	A	G	-0.0084	0.0018	3.24e-06
2-aminobutyrate	rs1510870	A	G	-0.0082	0.0018	3.17e-06
2-aminobutyrate	rs405945	T	C	-0.0082	0.0018	3.15e-06
2-aminobutyrate	rs2480198	T	C	0.0191	0.0041	3.11e-06
2-aminobutyrate	rs6841731	A	G	-0.0082	0.0018	2.92e-06
2-aminobutyrate	rs192812	T	C	0.0083	0.0018	2.89e-06
2-aminobutyrate	rs1975393	T	C	-0.0082	0.0018	2.76e-06
2-aminobutyrate	rs9323955	A	G	0.0083	0.0018	2.7e-06
2-aminobutyrate	rs2497127	A	G	-0.0192	0.0041	2.68e-06
2-aminobutyrate	rs13001750	C	G	0.0116	0.0025	2.58e-06
2-aminobutyrate	rs4093759	A	G	0.0082	0.0017	2.57e-06
2-aminobutyrate	rs6931284	A	T	-0.0196	0.0042	2.57e-06
2-aminobutyrate	rs7977065	T	C	-0.0082	0.0017	2.57e-06
2-aminobutyrate	rs4807508	A	G	-0.0123	0.0026	2.55e-06
2-aminobutyrate	rs11173402	A	G	0.0082	0.0018	2.53e-06
2-aminobutyrate	rs10877395	A	C	0.0082	0.0017	2.51e-06
2-aminobutyrate	rs518143	A	G	0.0084	0.0018	2.5e-06
2-aminobutyrate	rs9449803	A	G	-0.0195	0.0041	2.49e-06
2-aminobutyrate	rs2497112	A	G	0.0195	0.0041	2.49e-06
2-aminobutyrate	rs2476901	A	G	0.0195	0.0041	2.49e-06
2-aminobutyrate	rs9444142	T	C	-0.0195	0.0041	2.49e-06
2-aminobutyrate	rs6906432	T	G	-0.0195	0.0041	2.49e-06
2-aminobutyrate	rs16874287	T	C	0.0195	0.0041	2.49e-06
2-aminobutyrate	rs2476902	C	G	-0.0195	0.0041	2.48e-06
2-aminobutyrate	rs728721	T	C	-0.0195	0.0041	2.48e-06
2-aminobutyrate	rs4758848	A	G	-0.0082	0.0017	2.41e-06
2-aminobutyrate	rs735926	T	G	0.0083	0.0018	2.4e-06
2-aminobutyrate	rs40200	A	G	0.0161	0.0034	2.39e-06
2-aminobutyrate	rs17014432	A	G	-0.0083	0.0018	2.39e-06
2-aminobutyrate	rs10898127	T	G	0.0083	0.0018	2.39e-06
2-aminobutyrate	rs2497128	A	G	-0.0193	0.0041	2.37e-06
2-aminobutyrate	rs10877394	T	C	-0.0082	0.0017	2.36e-06
2-aminobutyrate	rs4671635	A	G	-0.0117	0.0025	2.35e-06
2-aminobutyrate	rs6725785	A	C	0.0117	0.0025	2.35e-06
2-aminobutyrate	rs28305	C	G	0.0159	0.0034	2.31e-06
2-aminobutyrate	rs10898007	T	C	0.0083	0.0018	2.3e-06
2-aminobutyrate	rs4625509	A	G	0.0082	0.0017	2.3e-06
2-aminobutyrate	rs10784024	A	T	-0.0083	0.0017	2.23e-06
2-aminobutyrate	rs1367985	T	C	0.0084	0.0018	2.1e-06
2-aminobutyrate	rs4717210	A	G	0.019	0.004	2.03e-06
2-aminobutyrate	rs2497129	T	C	-0.0195	0.0041	1.92e-06
2-aminobutyrate	rs958246	A	C	-0.0084	0.0018	1.82e-06
2-aminobutyrate	rs11885653	T	C	-0.0084	0.0018	1.76e-06
2-aminobutyrate	rs2497150	T	C	0.0198	0.0041	1.76e-06
2-aminobutyrate	rs7075426	A	G	-0.0084	0.0018	1.76e-06
2-aminobutyrate	rs2497122	A	G	0.0196	0.0041	1.73e-06
2-aminobutyrate	rs16826003	T	C	-0.0239	0.005	1.72e-06
2-aminobutyrate	rs4423843	A	G	0.0086	0.0018	1.51e-06
2-aminobutyrate	rs3961919	A	G	0.0085	0.0018	1.48e-06
2-aminobutyrate	rs1152594	A	G	-0.0085	0.0018	1.43e-06
2-aminobutyrate	rs4028695	A	G	0.0085	0.0018	1.39e-06
2-aminobutyrate	rs9821422	T	G	-0.0085	0.0018	1.37e-06
2-aminobutyrate	rs11233649	A	C	-0.0085	0.0018	1.25e-06
2-aminobutyrate	rs684729	T	C	0.0086	0.0018	1.23e-06
2-aminobutyrate	rs597533	A	G	0.0086	0.0018	1.21e-06
2-aminobutyrate	rs4815285	A	G	-0.0085	0.0018	1.19e-06
2-aminobutyrate	rs1080960	T	C	0.0202	0.0041	1.11e-06
2-aminobutyrate	rs7927629	T	C	0.0086	0.0018	1.04e-06
2-aminobutyrate	rs17763479	A	C	0.0167	0.0034	9.81e-07
2-aminobutyrate	rs755403	T	C	0.0087	0.0018	9.52e-07
2-aminobutyrate	rs6592116	T	C	0.0086	0.0018	9.17e-07
2-aminobutyrate	rs7131385	A	G	0.0086	0.0018	9.16e-07
2-aminobutyrate	rs13255448	T	C	-0.0126	0.0026	9.14e-07
2-aminobutyrate	rs2480197	A	G	0.0192	0.0039	9.11e-07
2-aminobutyrate	rs1897372	C	G	0.0086	0.0018	9.09e-07
2-aminobutyrate	rs4496953	A	G	0.0126	0.0026	9.08e-07
2-aminobutyrate	rs11607886	T	C	-0.0086	0.0018	9.06e-07
2-aminobutyrate	rs13261708	T	C	-0.0126	0.0026	8.96e-07
2-aminobutyrate	rs13267802	A	G	-0.0126	0.0026	8.92e-07
2-aminobutyrate	rs1011666	T	C	-0.0086	0.0018	8.87e-07
2-aminobutyrate	rs4479221	C	G	-0.0086	0.0018	8.69e-07
2-aminobutyrate	rs12991423	A	G	-0.0198	0.004	8.59e-07
2-aminobutyrate	rs9668893	T	C	-0.0086	0.0017	8.55e-07
2-aminobutyrate	rs13256255	A	G	-0.0126	0.0026	8.3e-07
2-aminobutyrate	rs11202023	T	C	-0.0087	0.0018	8.26e-07
2-aminobutyrate	rs597467	T	C	0.0087	0.0018	8.06e-07
2-aminobutyrate	rs37379	A	G	0.0168	0.0034	7.94e-07
2-aminobutyrate	rs2018507	A	G	-0.0088	0.0018	7.06e-07
2-aminobutyrate	rs3815987	T	C	-0.0088	0.0018	7.02e-07
2-aminobutyrate	rs7678928	T	C	-0.0087	0.0017	6.99e-07
2-aminobutyrate	rs919667	A	G	-0.0088	0.0018	6.97e-07
2-aminobutyrate	rs3815986	T	C	0.0088	0.0018	6.43e-07
2-aminobutyrate	rs1948226	A	G	-0.0087	0.0018	6.22e-07
2-aminobutyrate	rs2635185	A	G	0.0088	0.0018	5.97e-07
2-aminobutyrate	rs2635351	A	C	-0.0088	0.0018	5.95e-07
2-aminobutyrate	rs2635352	T	C	-0.0088	0.0018	5.95e-07
2-aminobutyrate	rs872227	T	C	-0.0088	0.0018	5.22e-07
2-aminobutyrate	rs1262242	T	C	0.0088	0.0018	5.22e-07
2-aminobutyrate	rs4758743	A	G	-0.0088	0.0017	4.96e-07
2-aminobutyrate	rs2480201	T	C	0.0279	0.0055	4.82e-07
2-aminobutyrate	rs3219	T	C	0.0206	0.0041	4.77e-07
2-aminobutyrate	rs4421983	T	G	0.0088	0.0018	4.65e-07
2-aminobutyrate	rs7314355	A	C	0.0088	0.0017	4.53e-07
2-aminobutyrate	rs7979069	T	C	-0.0088	0.0017	4.08e-07
2-aminobutyrate	rs7310323	A	C	0.0088	0.0017	4.07e-07
2-aminobutyrate	rs1432052	T	G	0.009	0.0018	3.99e-07
2-aminobutyrate	rs10790077	T	C	-0.009	0.0018	3.15e-07
2-aminobutyrate	rs1432054	A	G	0.009	0.0018	3.06e-07
2-aminobutyrate	rs1432053	T	C	-0.009	0.0018	3.03e-07
2-aminobutyrate	rs7741955	A	C	0.0306	0.0059	2.55e-07
2-aminobutyrate	rs2017320	T	C	-0.017	0.0033	1.99e-07
2-aminobutyrate	rs17185647	T	C	0.0313	0.006	1.83e-07
2-aminobutyrate	rs17185634	T	G	-0.0313	0.006	1.81e-07
2-aminobutyrate	rs17789596	A	G	0.0313	0.006	1.81e-07
2-aminobutyrate	rs1324147	C	G	0.0313	0.006	1.81e-07
2-aminobutyrate	rs1324146	A	C	0.0313	0.006	1.81e-07
2-aminobutyrate	rs1152592	A	G	-0.0092	0.0018	1.57e-07
2-aminobutyrate	rs1469609	A	C	0.0092	0.0018	1.48e-07
2-aminobutyrate	rs4315324	A	G	0.0092	0.0018	1.39e-07
2-aminobutyrate	rs10898126	T	G	0.0093	0.0018	1.37e-07
2-aminobutyrate	rs1469610	A	C	0.0093	0.0017	1.2e-07
2-aminobutyrate	rs1864774	T	C	0.0093	0.0017	1.15e-07
2-aminobutyrate	rs6972344	T	C	0.0094	0.0018	1.11e-07
2-aminobutyrate	rs11879267	A	G	-0.0138	0.0026	8.7e-08
2-aminobutyrate	rs2324637	T	C	0.0322	0.006	8e-08
2-aminobutyrate	rs12999720	A	G	-0.014	0.0026	5.46e-08
2-aminobutyrate	rs17668963	A	C	0.0326	0.006	5.33e-08
2-aminobutyrate	rs10024717	A	G	-0.0098	0.0018	3.14e-08
2-aminobutyrate	rs7576477	C	G	0.0143	0.0026	2.85e-08
2-aminobutyrate	rs7578272	A	T	-0.0148	0.0026	1.01e-08
2-aminobutyrate	rs13015738	A	G	-0.0148	0.0026	9e-09
2-aminobutyrate	rs13015870	A	C	0.0148	0.0026	8.99e-09
2-aminobutyrate	rs13035939	T	C	-0.0149	0.0026	8.92e-09
2-aminobutyrate	rs13008899	A	G	-0.0149	0.0026	8.89e-09
2-aminobutyrate	rs6731482	A	G	0.0149	0.0026	8.85e-09
2-aminobutyrate	rs6546116	A	T	0.0149	0.0026	8.8e-09
2-aminobutyrate	rs7590631	T	G	-0.0148	0.0026	8.55e-09
2-aminobutyrate	rs7593237	A	G	0.0149	0.0026	7.95e-09
2-aminobutyrate	rs17612451	T	G	-0.0149	0.0026	7.46e-09
2-aminobutyrate	rs17669269	C	G	0.015	0.0026	7.09e-09
2-aminobutyrate	rs17029659	T	C	-0.015	0.0026	6.22e-09
2-aminobutyrate	rs17029654	A	G	-0.015	0.0026	6.05e-09
2-aminobutyrate	rs1541580	T	C	0.0156	0.0024	1.03e-10
2-aminobutyrate	rs10022462	T	C	-0.0117	0.0018	4.55e-11
2-aminobutyrate	rs10211524	A	G	0.0189	0.0023	5.59e-16
3- (3-hydroxyphenyl) propionate	rs16871475	A	G	-0.0719	0.0163	9.79e-06
3- (3-hydroxyphenyl) propionate	rs11167296	A	T	0.0798	0.018	8.94e-06
3- (3-hydroxyphenyl) propionate	rs7201025	T	C	-0.0494	0.0111	8.72e-06
3- (3-hydroxyphenyl) propionate	rs3846659	C	G	0.0691	0.0155	8.64e-06
3- (3-hydroxyphenyl) propionate	rs7203888	T	C	0.0496	0.0111	7.92e-06
3- (3-hydroxyphenyl) propionate	rs7252102	A	G	-0.0545	0.0121	6.7e-06
3- (3-hydroxyphenyl) propionate	rs2459791	T	C	0.0552	0.0121	5.24e-06
3- (3-hydroxyphenyl) propionate	rs12920700	A	G	-0.0508	0.0111	4.7e-06
3- (3-hydroxyphenyl) propionate	rs6500859	A	T	-0.0511	0.0111	4.56e-06
3- (3-hydroxyphenyl) propionate	rs13346655	C	G	-0.0528	0.0115	4.25e-06
3- (3-hydroxyphenyl) propionate	rs17384314	C	G	0.0503	0.0109	4.11e-06
3- (3-hydroxyphenyl) propionate	rs7110135	C	G	0.0523	0.0113	4e-06
3- (3-hydroxyphenyl) propionate	rs11906890	A	G	-0.0801	0.0173	3.73e-06
3- (3-hydroxyphenyl) propionate	rs4796899	T	G	0.093	0.0201	3.55e-06
3- (3-hydroxyphenyl) propionate	rs2278997	A	G	0.0533	0.0115	3.48e-06
3- (3-hydroxyphenyl) propionate	rs11666569	T	C	0.0564	0.0122	3.43e-06
3- (3-hydroxyphenyl) propionate	rs11907654	A	G	0.0809	0.0173	3.05e-06
3- (3-hydroxyphenyl) propionate	rs12480837	A	G	-0.081	0.0173	2.89e-06
3- (3-hydroxyphenyl) propionate	rs17059417	A	G	0.1061	0.0227	2.86e-06
3- (3-hydroxyphenyl) propionate	rs12461874	A	C	0.0569	0.0121	2.7e-06
3- (3-hydroxyphenyl) propionate	rs12537257	A	G	0.0912	0.0194	2.48e-06
3- (3-hydroxyphenyl) propionate	rs3093561	A	G	0.5943	0.1227	1.27e-06
3- (3-hydroxyphenyl) propionate	rs883595	A	G	-0.1659	0.0341	1.14e-06
3- (4-hydroxyphenyl) lactate	rs4881425	T	C	0.0115	0.0026	9.81e-06
3- (4-hydroxyphenyl) lactate	rs2140090	T	G	-0.0113	0.0026	9.57e-06
3- (4-hydroxyphenyl) lactate	rs4746077	A	T	-0.0316	0.0071	9.27e-06
3- (4-hydroxyphenyl) lactate	rs6919482	T	C	-0.0826	0.0186	9.2e-06
3- (4-hydroxyphenyl) lactate	rs17010109	C	G	-0.0267	0.006	9.05e-06
3- (4-hydroxyphenyl) lactate	rs16868525	A	C	0.0454	0.0102	8.73e-06
3- (4-hydroxyphenyl) lactate	rs11815997	T	G	-0.0117	0.0026	8.71e-06
3- (4-hydroxyphenyl) lactate	rs1889460	T	C	-0.0117	0.0026	8.69e-06
3- (4-hydroxyphenyl) lactate	rs6942571	A	T	0.0214	0.0048	8.61e-06
3- (4-hydroxyphenyl) lactate	rs9973135	T	C	-0.0251	0.0056	8.32e-06
3- (4-hydroxyphenyl) lactate	rs869009	T	C	0.0117	0.0026	8.26e-06
3- (4-hydroxyphenyl) lactate	rs4775770	A	G	-0.0156	0.0035	8.26e-06
3- (4-hydroxyphenyl) lactate	rs11647808	A	C	0.0222	0.005	8.19e-06
3- (4-hydroxyphenyl) lactate	rs11643959	T	G	-0.0222	0.005	8.19e-06
3- (4-hydroxyphenyl) lactate	rs1574351	A	G	-0.0117	0.0026	8.1e-06
3- (4-hydroxyphenyl) lactate	rs1036244	T	C	0.0116	0.0026	7.8e-06
3- (4-hydroxyphenyl) lactate	rs16868513	A	G	0.0454	0.0101	7.34e-06
3- (4-hydroxyphenyl) lactate	rs7728541	A	G	0.0455	0.0101	7.09e-06
3- (4-hydroxyphenyl) lactate	rs2817479	T	G	0.0126	0.0028	6.92e-06
3- (4-hydroxyphenyl) lactate	rs3915129	T	G	0.0116	0.0026	6.82e-06
3- (4-hydroxyphenyl) lactate	rs17631990	T	C	0.0237	0.0053	6.81e-06
3- (4-hydroxyphenyl) lactate	rs1574228	A	G	0.0119	0.0026	6.71e-06
3- (4-hydroxyphenyl) lactate	rs17010007	T	G	0.036	0.0079	5.99e-06
3- (4-hydroxyphenyl) lactate	rs2819346	A	C	-0.0118	0.0026	5.96e-06
3- (4-hydroxyphenyl) lactate	rs12406123	T	C	0.0264	0.0058	5.78e-06
3- (4-hydroxyphenyl) lactate	rs2250377	A	G	0.0119	0.0026	5.35e-06
3- (4-hydroxyphenyl) lactate	rs2819349	T	C	0.0119	0.0026	5.08e-06
3- (4-hydroxyphenyl) lactate	rs2820311	A	G	-0.0119	0.0026	5.03e-06
3- (4-hydroxyphenyl) lactate	rs2819348	T	C	-0.0119	0.0026	5.01e-06
3- (4-hydroxyphenyl) lactate	rs10492467	T	C	-0.0228	0.005	4.91e-06
3- (4-hydroxyphenyl) lactate	rs2644122	A	G	-0.0119	0.0026	4.7e-06
3- (4-hydroxyphenyl) lactate	rs2644121	A	G	-0.0119	0.0026	4.69e-06
3- (4-hydroxyphenyl) lactate	rs2644107	T	C	-0.0119	0.0026	4.68e-06
3- (4-hydroxyphenyl) lactate	rs1400875	T	C	-0.0119	0.0026	4.67e-06
3- (4-hydroxyphenyl) lactate	rs12853559	A	G	0.0228	0.005	4.63e-06
3- (4-hydroxyphenyl) lactate	rs2819347	C	G	-0.0119	0.0026	4.57e-06
3- (4-hydroxyphenyl) lactate	rs2820323	A	G	0.0119	0.0026	4.54e-06
3- (4-hydroxyphenyl) lactate	rs2644119	T	C	0.0121	0.0026	4.24e-06
3- (4-hydroxyphenyl) lactate	rs6694519	T	C	0.0123	0.0027	3.87e-06
3- (4-hydroxyphenyl) lactate	rs2820295	A	G	0.012	0.0026	3.8e-06
3- (4-hydroxyphenyl) lactate	rs9870255	C	G	-0.012	0.0026	3.73e-06
3- (4-hydroxyphenyl) lactate	rs6699507	T	C	-0.0159	0.0034	3.25e-06
3- (4-hydroxyphenyl) lactate	rs4784054	A	G	0.02	0.0043	2.9e-06
3- (4-hydroxyphenyl) lactate	rs11644269	A	G	0.02	0.0043	2.9e-06
3- (4-hydroxyphenyl) lactate	rs4235022	T	C	-0.0827	0.0177	2.81e-06
3- (4-hydroxyphenyl) lactate	rs7688048	A	G	0.0826	0.0176	2.79e-06
3- (4-hydroxyphenyl) lactate	rs4510065	T	C	0.0163	0.0035	2.77e-06
3- (4-hydroxyphenyl) lactate	rs8062792	A	G	0.0204	0.0044	2.72e-06
3- (4-hydroxyphenyl) lactate	rs3749572	T	C	0.0808	0.0172	2.62e-06
3- (4-hydroxyphenyl) lactate	rs4641779	A	C	0.0165	0.0035	2.37e-06
3- (4-hydroxyphenyl) lactate	rs12406150	T	C	0.0276	0.0059	2.36e-06
3- (4-hydroxyphenyl) lactate	rs12401469	A	T	0.0277	0.0059	2.16e-06
3- (4-hydroxyphenyl) lactate	rs7204324	A	T	-0.0236	0.005	2.12e-06
3- (4-hydroxyphenyl) lactate	rs2678209	A	G	0.0126	0.0026	1.85e-06
3- (4-hydroxyphenyl) lactate	rs17101404	A	G	0.0245	0.0051	1.85e-06
3- (4-hydroxyphenyl) lactate	rs17480173	A	C	-0.0212	0.0044	1.6e-06
3- (4-hydroxyphenyl) lactate	rs8024	A	C	0.0126	0.0026	1.58e-06
3- (4-hydroxyphenyl) lactate	rs1552425	A	T	-0.0123	0.0026	1.54e-06
3- (4-hydroxyphenyl) lactate	rs718377	A	G	-0.0126	0.0026	1.29e-06
3- (4-hydroxyphenyl) lactate	rs17389253	T	C	-0.0214	0.0044	1.03e-06
3- (4-hydroxyphenyl) lactate	rs6691915	A	G	0.013	0.0027	8.95e-07
3- (4-hydroxyphenyl) lactate	rs2228309	A	G	-0.0154	0.0031	8.63e-07
3- (4-hydroxyphenyl) lactate	rs17010084	T	C	-0.0291	0.0059	7.19e-07
3- (4-hydroxyphenyl) lactate	rs17010076	T	C	-0.0291	0.0059	7.08e-07
3- (4-hydroxyphenyl) lactate	rs17010170	C	G	-0.0292	0.0059	6.61e-07
3- (4-hydroxyphenyl) lactate	rs12601558	A	C	0.0184	0.0037	6.54e-07
3- (4-hydroxyphenyl) lactate	rs9747201	A	C	0.016	0.0026	9.48e-10
3- (4-hydroxyphenyl) lactate	rs9944398	A	G	0.0162	0.0026	5.4e-10
3- (4-hydroxyphenyl) lactate	rs4239020	T	C	-0.0162	0.0026	5.36e-10
3- (4-hydroxyphenyl) lactate	rs8082212	C	G	-0.0162	0.0026	5.33e-10
3- (4-hydroxyphenyl) lactate	rs6502056	C	G	-0.0161	0.0026	4.61e-10
3- (4-hydroxyphenyl) lactate	rs8072702	T	C	0.0161	0.0026	4.59e-10
3- (4-hydroxyphenyl) lactate	rs9747668	A	G	0.0164	0.0026	4.12e-10
3- (4-hydroxyphenyl) lactate	rs9674648	A	G	0.0161	0.0026	3.64e-10
3- (4-hydroxyphenyl) lactate	rs8070014	T	G	0.0164	0.0026	2.14e-10
3- (4-hydroxyphenyl) lactate	rs6502051	A	C	-0.0164	0.0026	2.07e-10
3- (4-hydroxyphenyl) lactate	rs12150589	A	T	0.0167	0.0026	1.72e-10
3- (4-hydroxyphenyl) lactate	rs7502676	C	G	0.0167	0.0026	1.05e-10
3- (4-hydroxyphenyl) lactate	rs6502050	C	G	-0.0168	0.0026	9.84e-11
3- (4-hydroxyphenyl) lactate	rs6416857	A	G	-0.0167	0.0026	9.01e-11
3- (4-hydroxyphenyl) lactate	rs8082577	T	C	-0.0168	0.0026	7.19e-11
3- (4-hydroxyphenyl) lactate	rs6502055	T	G	0.0168	0.0026	7.13e-11
3- (4-hydroxyphenyl) lactate	rs7217625	T	C	0.0169	0.0026	6.07e-11
3- (4-hydroxyphenyl) lactate	rs7503429	A	C	-0.0171	0.0026	5.08e-11
3- (4-hydroxyphenyl) lactate	rs9916231	T	C	0.017	0.0026	4.84e-11
3- (4-hydroxyphenyl) lactate	rs9911379	A	G	0.0169	0.0026	4.53e-11
3- (4-hydroxyphenyl) lactate	rs7226049	A	G	-0.0169	0.0026	3.63e-11
3- (4-hydroxyphenyl) lactate	rs9905991	A	G	-0.0171	0.0026	3.49e-11
3- (4-hydroxyphenyl) lactate	rs8071737	T	C	0.0172	0.0026	3.3e-11
3- (4-hydroxyphenyl) lactate	rs8078087	T	G	0.0171	0.0026	3.08e-11
3- (4-hydroxyphenyl) lactate	rs7503225	A	C	-0.0171	0.0026	3.08e-11
3- (4-hydroxyphenyl) lactate	rs7501461	T	C	-0.0171	0.0026	3.08e-11
3- (4-hydroxyphenyl) lactate	rs8080423	A	G	0.0171	0.0026	3.08e-11
3- (4-hydroxyphenyl) lactate	rs6502070	A	G	-0.0171	0.0026	3.08e-11
3- (4-hydroxyphenyl) lactate	rs3935128	T	C	0.0171	0.0026	3.08e-11
3- (4-hydroxyphenyl) lactate	rs6502068	T	C	-0.0171	0.0026	3.08e-11
3- (4-hydroxyphenyl) lactate	rs12051747	T	C	0.0171	0.0026	3.06e-11
3- (4-hydroxyphenyl) lactate	rs8080625	A	G	-0.0171	0.0026	3.01e-11
3- (4-hydroxyphenyl) lactate	rs9891378	T	C	0.0171	0.0026	2.98e-11
3- (4-hydroxyphenyl) lactate	rs3088177	A	G	0.0172	0.0026	2.98e-11
3- (4-hydroxyphenyl) lactate	rs7502078	A	C	-0.0171	0.0026	2.93e-11
3- (4-hydroxyphenyl) lactate	rs4789675	A	G	-0.0171	0.0026	2.93e-11
3- (4-hydroxyphenyl) lactate	rs9904237	A	G	-0.0171	0.0026	2.93e-11
3- (4-hydroxyphenyl) lactate	rs12945993	T	C	0.0171	0.0026	2.93e-11
3- (4-hydroxyphenyl) lactate	rs6502078	A	G	-0.0171	0.0026	2.93e-11
3- (4-hydroxyphenyl) lactate	rs9898326	T	C	-0.0171	0.0026	2.93e-11
3- (4-hydroxyphenyl) lactate	rs11491185	T	C	-0.0171	0.0026	2.93e-11
3- (4-hydroxyphenyl) lactate	rs4641801	A	G	-0.0171	0.0026	2.93e-11
3- (4-hydroxyphenyl) lactate	rs7209474	T	C	-0.0171	0.0026	2.93e-11
3- (4-hydroxyphenyl) lactate	rs7220639	A	G	-0.0171	0.0026	2.93e-11
3- (4-hydroxyphenyl) lactate	rs3935816	T	C	-0.0171	0.0026	2.93e-11
3- (4-hydroxyphenyl) lactate	rs9891962	T	C	0.0171	0.0026	2.93e-11
3- (4-hydroxyphenyl) lactate	rs8082355	A	G	0.0171	0.0026	2.93e-11
3- (4-hydroxyphenyl) lactate	rs9898542	T	C	-0.0171	0.0026	2.93e-11
3- (4-hydroxyphenyl) lactate	rs9898507	T	C	-0.0171	0.0026	2.93e-11
3- (4-hydroxyphenyl) lactate	rs8066284	T	C	-0.0171	0.0026	2.93e-11
3- (4-hydroxyphenyl) lactate	rs12950475	T	C	0.0171	0.0026	2.92e-11
3- (4-hydroxyphenyl) lactate	rs8081783	A	G	-0.0171	0.0026	2.91e-11
3- (4-hydroxyphenyl) lactate	rs8081949	A	G	-0.0171	0.0026	2.91e-11
3- (4-hydroxyphenyl) lactate	rs8077926	A	C	-0.0171	0.0026	2.91e-11
3- (4-hydroxyphenyl) lactate	rs11654584	A	T	0.0174	0.0026	2.43e-11
3- (4-hydroxyphenyl) lactate	rs7225637	A	G	0.0175	0.0026	1.5e-11
3- (4-hydroxyphenyl) lactate	rs4247357	T	G	-0.0176	0.0026	9.09e-12
3- (4-hydroxyphenyl) lactate	rs7208673	C	G	-0.0176	0.0026	9.08e-12
3- (4-hydroxyphenyl) lactate	rs8079388	A	C	-0.0176	0.0026	8.99e-12
3- (4-hydroxyphenyl) lactate	rs4789668	T	C	-0.0177	0.0026	7.3e-12
3- (4-hydroxyphenyl) lactate	rs7215277	A	C	-0.0177	0.0026	7.28e-12
3- (4-hydroxyphenyl) lactate	rs7406163	T	C	0.0177	0.0026	6.98e-12
3- (4-hydroxyphenyl) lactate	rs7406220	T	C	-0.0177	0.0026	5.74e-12
3- (4-hydroxyphenyl) lactate	rs11077969	A	G	-0.0177	0.0026	5.74e-12
3- (4-hydroxyphenyl) lactate	rs11658335	T	C	0.0177	0.0026	5.74e-12
3- (4-hydroxyphenyl) lactate	rs7221544	T	C	0.0177	0.0026	5.74e-12
3- (4-hydroxyphenyl) lactate	rs4789698	T	C	-0.0177	0.0026	5.48e-12
3- (4-hydroxyphenyl) lactate	rs6502057	A	G	-0.0178	0.0026	5.17e-12
3- (4-hydroxyphenyl) lactate	rs8071425	T	C	0.0178	0.0026	4.31e-12
3- (4-hydroxyphenyl) lactate	rs8077772	T	C	-0.0178	0.0026	4.24e-12
3- (4-hydroxyphenyl) lactate	rs8073679	A	G	-0.0179	0.0026	4.02e-12
3- (4-hydroxyphenyl) lactate	rs4132775	T	C	-0.0179	0.0026	4.02e-12
3- (4-hydroxyphenyl) lactate	rs4789720	C	G	-0.0179	0.0026	4.02e-12
3- (4-hydroxyphenyl) lactate	rs4789670	T	C	0.018	0.0026	3.76e-12
3- (4-hydroxyphenyl) lactate	rs4789754	A	G	-0.0178	0.0026	3.63e-12
3- (4-hydroxyphenyl) lactate	rs8067875	T	C	-0.0178	0.0026	3.37e-12
3- (4-hydroxyphenyl) lactate	rs4789671	T	C	-0.0181	0.0026	3.06e-12
3- (4-hydroxyphenyl) lactate	rs4459614	T	C	0.018	0.0026	2.39e-12
3- (4-hydroxyphenyl) lactate	rs4625783	T	C	-0.0187	0.0026	3.9e-13
3-hydroxybutyrate	rs1547058	T	C	-0.1099	0.0247	8.67e-06
3-hydroxybutyrate	rs2295758	T	C	-0.1137	0.0255	8.57e-06
3-hydroxybutyrate	rs7314742	T	G	-0.0358	0.008	8.51e-06
3-hydroxybutyrate	rs2249219	C	G	0.0362	0.0081	7.55e-06
3-hydroxybutyrate	rs11224003	A	G	0.0419	0.0093	7.07e-06
3-hydroxybutyrate	rs2527653	C	G	-0.0304	0.0068	6.96e-06
3-hydroxybutyrate	rs2711506	A	G	-0.0326	0.0072	6.35e-06
3-hydroxybutyrate	rs17509986	T	G	-0.0958	0.0212	6.04e-06
3-hydroxybutyrate	rs6493912	T	C	-0.0368	0.0081	5.36e-06
3-hydroxybutyrate	rs4838537	T	C	0.3226	0.0699	3.96e-06
3-hydroxybutyrate	rs17508336	A	G	-0.0891	0.0193	3.87e-06
3-hydroxybutyrate	rs4297577	T	C	0.0977	0.0209	2.94e-06
3-hydroxybutyrate	rs13288937	A	C	0.2488	0.0526	2.29e-06
3-hydroxybutyrate	rs8000457	T	C	-0.2093	0.0433	1.35e-06
3-hydroxybutyrate	rs1822906	A	G	0.041	0.0083	9.05e-07
3-hydroxybutyrate	rs1348656	T	C	-0.0436	0.0088	7.29e-07
3-hydroxybutyrate	rs11719883	C	G	-0.0524	0.0103	3.86e-07
3-hydroxyglutarate	rs16977497	A	G	0.0538	0.0122	9.91e-06
3-hydroxyglutarate	rs10966195	T	C	0.0148	0.0034	9.8e-06
3-hydroxyglutarate	rs890519	A	C	0.0147	0.0033	9.06e-06
3-hydroxyglutarate	rs17060337	A	G	-0.1035	0.0233	9.04e-06
3-hydroxyglutarate	rs1568101	T	C	-0.0255	0.0057	8.62e-06
3-hydroxyglutarate	rs1555364	T	C	0.015	0.0034	8.23e-06
3-hydroxyglutarate	rs6100536	T	C	0.0151	0.0034	7.75e-06
3-hydroxyglutarate	rs6484669	T	C	-0.0196	0.0044	7.75e-06
3-hydroxyglutarate	rs911150	T	C	-0.0151	0.0034	7.51e-06
3-hydroxyglutarate	rs4395303	A	G	-0.0152	0.0034	7.23e-06
3-hydroxyglutarate	rs4131556	C	G	-0.0151	0.0034	7.12e-06
3-hydroxyglutarate	rs10966201	T	C	0.0151	0.0034	7.11e-06
3-hydroxyglutarate	rs9544785	A	C	-0.015	0.0033	6.63e-06
3-hydroxyglutarate	rs7702827	C	G	-0.0152	0.0034	6.29e-06
3-hydroxyglutarate	rs6064822	A	G	-0.0153	0.0034	5.8e-06
3-hydroxyglutarate	rs4921229	T	G	0.0153	0.0034	5.44e-06
3-hydroxyglutarate	rs11793331	T	C	0.0619	0.0136	5.09e-06
3-hydroxyglutarate	rs7726949	T	C	0.0241	0.0053	4.63e-06
3-hydroxyglutarate	rs6064820	T	C	0.0155	0.0034	4.01e-06
3-hydroxyglutarate	rs16823866	T	C	-0.0303	0.0066	3.93e-06
3-hydroxyglutarate	rs7725624	A	C	-0.044	0.0094	3.02e-06
3-hydroxyglutarate	rs8176023	A	G	-0.0411	0.0087	2.46e-06
3-hydroxyglutarate	rs6974494	T	C	-0.0164	0.0035	2.04e-06
3-hydroxyglutarate	rs2372033	T	C	-0.0166	0.0035	1.56e-06
3-hydroxyglutarate	rs4732545	T	C	-0.0166	0.0035	1.56e-06
3-hydroxyglutarate	rs12707617	A	G	-0.0166	0.0035	1.56e-06
3-hydroxyglutarate	rs933341	A	G	0.0166	0.0035	1.56e-06
3-hydroxyglutarate	rs4732543	A	G	0.0166	0.0035	1.56e-06
3-hydroxyglutarate	rs929334	T	C	0.0166	0.0035	1.56e-06
3-hydroxyglutarate	rs10196007	T	C	-0.032	0.0065	7.63e-07
3-indoxyl sulfate	rs16891725	T	C	0.0242	0.0055	9.54e-06
3-indoxyl sulfate	rs1564485	A	T	0.0158	0.0035	7.85e-06
3-indoxyl sulfate	rs527140	A	G	-0.0329	0.0073	6.77e-06
3-indoxyl sulfate	rs3847067	A	C	-0.0316	0.007	6.69e-06
3-indoxyl sulfate	rs11153879	A	T	0.0199	0.0044	6.53e-06
3-indoxyl sulfate	rs12191839	A	G	-0.0198	0.0044	6.27e-06
3-indoxyl sulfate	rs10031835	T	C	-0.034	0.0075	5.81e-06
3-indoxyl sulfate	rs13195509	A	G	0.0255	0.0056	5.54e-06
3-indoxyl sulfate	rs12193636	T	G	-0.02	0.0044	4.96e-06
3-indoxyl sulfate	rs6937757	A	G	-0.02	0.0044	4.93e-06
3-indoxyl sulfate	rs17043547	A	T	-0.079	0.0173	4.9e-06
3-indoxyl sulfate	rs6911218	A	G	-0.0201	0.0044	4.8e-06
3-indoxyl sulfate	rs12192691	T	C	0.0201	0.0044	4.76e-06
3-indoxyl sulfate	rs12212439	T	C	-0.0201	0.0044	4.76e-06
3-indoxyl sulfate	rs10457377	A	G	0.0204	0.0044	3.19e-06
3-indoxyl sulfate	rs9379897	T	C	-0.0261	0.0055	2.04e-06
3-indoxyl sulfate	rs9489956	T	C	0.0395	0.0079	5.28e-07
3-methoxytyrosine	rs10414464	T	C	-0.0117	0.0026	9.9e-06
3-methoxytyrosine	rs2334252	T	G	-0.0117	0.0026	9.76e-06
3-methoxytyrosine	rs10409728	A	G	-0.0117	0.0026	9.67e-06
3-methoxytyrosine	rs9323203	A	C	-0.0118	0.0027	9.5e-06
3-methoxytyrosine	rs10884254	T	C	-0.0273	0.0062	8.99e-06
3-methoxytyrosine	rs7909681	T	C	0.0273	0.0062	8.91e-06
3-methoxytyrosine	rs12530905	T	C	-0.0117	0.0026	8.79e-06
3-methoxytyrosine	rs7514881	C	G	0.012	0.0027	8.53e-06
3-methoxytyrosine	rs17085526	A	G	-0.0118	0.0026	7.92e-06
3-methoxytyrosine	rs12662219	A	G	0.0117	0.0026	7.91e-06
3-methoxytyrosine	rs7752829	T	G	0.0117	0.0026	7.91e-06
3-methoxytyrosine	rs11192702	A	G	-0.0275	0.0062	7.88e-06
3-methoxytyrosine	rs11765351	T	C	-0.0117	0.0026	7.82e-06
3-methoxytyrosine	rs7908166	A	G	-0.0356	0.0079	7.68e-06
3-methoxytyrosine	rs12530900	T	C	-0.0118	0.0026	7.11e-06
3-methoxytyrosine	rs10963172	A	G	0.0352	0.0078	6.99e-06
3-methoxytyrosine	rs10800623	A	G	-0.0262	0.0058	6.17e-06
3-methoxytyrosine	rs10012175	T	C	0.0194	0.0043	5.78e-06
3-methoxytyrosine	rs11564705	T	C	-0.0153	0.0033	5.21e-06
3-methoxytyrosine	rs10234744	A	G	-0.0119	0.0026	5.2e-06
3-methoxytyrosine	rs6448908	T	C	0.0843	0.0184	4.7e-06
3-methoxytyrosine	rs11155996	A	G	-0.0122	0.0027	4.19e-06
3-methoxytyrosine	rs6442530	T	C	-0.026	0.0055	2.75e-06
3-methoxytyrosine	rs12131781	A	G	0.0126	0.0027	2.59e-06
3-methoxytyrosine	rs7751499	A	G	0.0124	0.0026	2.57e-06
3-methoxytyrosine	rs12538514	C	G	0.0124	0.0026	2.43e-06
3-methoxytyrosine	rs6592988	T	C	0.0167	0.0035	2.4e-06
3-methoxytyrosine	rs7253109	T	G	0.0125	0.0026	2.34e-06
3-methoxytyrosine	rs11043016	T	C	-0.016	0.0033	1.9e-06
3-methoxytyrosine	rs339710	A	T	0.0126	0.0026	1.77e-06
3-methoxytyrosine	rs11042978	T	G	-0.0133	0.0028	1.66e-06
3-methoxytyrosine	rs4930046	A	G	-0.0134	0.0028	1.47e-06
3-methoxytyrosine	rs11564710	A	C	0.0166	0.0034	9.79e-07
3-methoxytyrosine	rs12815706	A	G	0.019	0.0039	9.1e-07
3-methoxytyrosine	rs339716	A	G	0.0135	0.0026	3.19e-07
3-methoxytyrosine	rs235207	C	G	-0.0143	0.0026	6.56e-08
3-methoxytyrosine	rs339707	T	G	-0.0142	0.0026	6.35e-08
4-hydroxyhippurate	rs7737173	A	G	0.0368	0.0083	9.83e-06
4-hydroxyhippurate	rs1371438	A	C	-0.0368	0.0075	9.75e-06
4-hydroxyhippurate	rs12105275	A	G	-0.0371	0.0081	9.17e-06
4-hydroxyhippurate	rs2028355	A	G	0.0392	0.0084	9.02e-06
4-hydroxyhippurate	rs9580319	T	C	-0.0641	0.014	8.8e-06
4-hydroxyhippurate	rs13296917	T	C	0.2143	0.0481	8.59e-06
4-hydroxyhippurate	rs12466506	C	G	-0.0463	0.0104	8.57e-06
4-hydroxyhippurate	rs1948766	T	G	-0.037	0.0083	8.25e-06
4-hydroxyhippurate	rs6550458	A	T	0.0331	0.0072	7.72e-06
4-hydroxyhippurate	rs1158709	T	C	-0.0336	0.0076	6.83e-06
4-hydroxyhippurate	rs3910600	A	G	0.0368	0.0075	6.25e-06
4-hydroxyhippurate	rs1158556	A	G	0.0371	0.0081	5.9e-06
4-hydroxyhippurate	rs8054116	A	C	0.0352	0.008	4.56e-06
4-hydroxyhippurate	rs12053454	T	C	-0.0393	0.0084	4.53e-06
4-hydroxyhippurate	rs1561529	A	G	0.0463	0.0104	4.53e-06
4-hydroxyhippurate	rs1551864	T	C	-0.038	0.0084	4.52e-06
4-hydroxyhippurate	rs1946882	T	C	-0.0371	0.0081	4.52e-06
4-hydroxyhippurate	rs1900312	T	C	0.0371	0.0081	4.51e-06
4-hydroxyhippurate	rs2224722	T	G	0.0628	0.014	4.51e-06
4-hydroxyhippurate	rs1439737	T	C	0.0368	0.0075	4.44e-06
4-hydroxyhippurate	rs1439726	A	C	-0.0371	0.0081	4.28e-06
4-hydroxyhippurate	rs11932470	A	G	0.0361	0.0076	2.79e-06
4-hydroxyhippurate	rs993915	C	G	-0.0371	0.0081	2.76e-06
4-hydroxyhippurate	rs9417900	T	C	0.0385	0.0085	2.42e-06
4-hydroxyhippurate	rs7083146	A	G	0.0388	0.0087	1.08e-06
4-hydroxyhippurate	rs12422389	T	C	-0.0801	0.018	1.08e-06
4-hydroxyhippurate	rs1837430	C	G	-0.0371	0.0081	1.08e-06
7-Hoca	rs2073156	A	G	-0.0114	0.0026	9.92e-06
7-Hoca	rs2073157	A	G	0.0114	0.0026	9.85e-06
7-Hoca	rs11853268	T	C	-0.0116	0.0026	8.86e-06
7-Hoca	rs2279283	T	C	-0.0116	0.0026	8.85e-06
7-Hoca	rs8091031	T	C	-0.0116	0.0026	8.03e-06
7-Hoca	rs4777467	T	C	-0.0117	0.0026	8.01e-06
7-Hoca	rs16750	A	G	-0.015	0.0034	7.59e-06
7-Hoca	rs2146548	T	G	0.012	0.0027	7e-06
7-Hoca	rs12455458	A	G	0.0117	0.0026	6.99e-06
7-Hoca	rs9953686	T	C	0.0118	0.0026	6.93e-06
7-Hoca	rs12509356	C	G	0.018	0.004	6.8e-06
7-Hoca	rs12591338	A	T	0.0118	0.0026	6.26e-06
7-Hoca	rs2856929	T	C	-0.0118	0.0026	6.06e-06
7-Hoca	rs4776586	A	C	0.0118	0.0026	6.02e-06
7-Hoca	rs12217848	A	G	0.0118	0.0026	5.74e-06
7-Hoca	rs9830523	T	C	-0.0346	0.0076	5.7e-06
7-Hoca	rs2306488	A	G	-0.0118	0.0026	5.66e-06
7-Hoca	rs2035379	T	C	0.0119	0.0026	5.61e-06
7-Hoca	rs9954696	A	T	0.0121	0.0027	5.36e-06
7-Hoca	rs12593134	C	G	0.0119	0.0026	5.18e-06
7-Hoca	rs2200056	T	C	-0.0119	0.0026	5.18e-06
7-Hoca	rs2415130	A	G	0.0117	0.0026	5.15e-06
7-Hoca	rs4238449	A	G	0.0119	0.0026	4.84e-06
7-Hoca	rs4472338	T	C	-0.0118	0.0026	4.57e-06
7-Hoca	rs16956241	T	G	0.012	0.0026	4.53e-06
7-Hoca	rs1428365	T	C	-0.0192	0.0042	4.52e-06
7-Hoca	rs9369302	T	C	0.0118	0.0026	4.15e-06
7-Hoca	rs10064153	A	C	-0.0119	0.0026	3.78e-06
7-Hoca	rs7225312	A	T	-0.0162	0.0035	3.16e-06
7-Hoca	rs1007514	A	G	-0.014	0.003	3.06e-06
7-Hoca	rs12904652	T	C	-0.0121	0.0026	2.75e-06
7-Hoca	rs4238447	T	C	0.0123	0.0026	2.43e-06
7-Hoca	rs2625530	A	G	0.0123	0.0026	2.41e-06
7-Hoca	rs6755317	A	G	0.0357	0.0075	2.03e-06
7-Hoca	rs11593054	T	G	0.0123	0.0025	1.12e-06
7-Hoca	rs10501675	A	C	-0.0346	0.007	7.05e-07
7-Hoca	rs11627218	A	T	0.013	0.0026	6.46e-07
acetylcarnitine	rs2764907	C	G	0.0189	0.0043	9.95e-06
acetylcarnitine	rs13257229	T	C	0.0205	0.0046	9.88e-06
acetylcarnitine	rs1431472	T	C	0.012	0.0027	9.42e-06
acetylcarnitine	rs1655907	T	C	0.0293	0.0066	9.3e-06
acetylcarnitine	rs17132127	A	T	-0.0297	0.0067	9.19e-06
acetylcarnitine	rs7715572	A	G	0.0298	0.0067	8.94e-06
acetylcarnitine	rs10037883	A	G	-0.0298	0.0067	8.94e-06
acetylcarnitine	rs7713502	T	G	0.0297	0.0067	8.91e-06
acetylcarnitine	rs10054049	A	G	0.0271	0.0061	8.56e-06
acetylcarnitine	rs17065805	T	C	-0.0223	0.005	8.24e-06
acetylcarnitine	rs2228070	T	C	0.0118	0.0027	8.2e-06
acetylcarnitine	rs6881245	A	C	-0.03	0.0067	8.17e-06
acetylcarnitine	rs17171872	A	C	-0.0297	0.0067	8.17e-06
acetylcarnitine	rs10735937	T	C	-0.0147	0.0033	8e-06
acetylcarnitine	rs6881814	T	C	-0.0297	0.0067	7.97e-06
acetylcarnitine	rs4395626	A	G	0.0303	0.0068	7.92e-06
acetylcarnitine	rs9327595	A	G	-0.03	0.0067	7.83e-06
acetylcarnitine	rs6596025	T	G	-0.03	0.0067	7.59e-06
acetylcarnitine	rs1625356	A	G	0.0254	0.0057	7.46e-06
acetylcarnitine	rs9289719	T	G	0.012	0.0027	7.38e-06
acetylcarnitine	rs1981524	T	C	0.012	0.0027	6.66e-06
acetylcarnitine	rs7713612	C	G	0.0206	0.0046	6.56e-06
acetylcarnitine	rs1348656	T	C	-0.012	0.0027	6.52e-06
acetylcarnitine	rs13184373	T	C	-0.0124	0.0027	6.38e-06
acetylcarnitine	rs7714321	T	C	-0.0306	0.0068	6.35e-06
acetylcarnitine	rs4852897	T	C	0.0122	0.0027	6.27e-06
acetylcarnitine	rs1632913	T	C	0.0291	0.0064	6.24e-06
acetylcarnitine	rs12615875	A	T	-0.0122	0.0027	6.2e-06
acetylcarnitine	rs12614041	T	C	0.0122	0.0027	6.2e-06
acetylcarnitine	rs2063168	C	G	-0.0122	0.0027	6.2e-06
acetylcarnitine	rs3914020	T	G	0.0304	0.0067	6.19e-06
acetylcarnitine	rs3852208	A	C	0.0275	0.0061	6.11e-06
acetylcarnitine	rs7709979	A	C	-0.0278	0.0061	6.09e-06
acetylcarnitine	rs7714362	T	G	-0.0278	0.0061	6.09e-06
acetylcarnitine	rs11954454	A	G	0.0275	0.0061	6.01e-06
acetylcarnitine	rs1171618	T	C	-0.012	0.0027	5.73e-06
acetylcarnitine	rs6810706	A	G	0.0221	0.0049	5.44e-06
acetylcarnitine	rs3844363	A	T	0.0114	0.0025	5.23e-06
acetylcarnitine	rs2706379	T	C	0.0121	0.0027	5.05e-06
acetylcarnitine	rs10058531	T	C	0.0304	0.0067	5.04e-06
acetylcarnitine	rs10079835	T	G	-0.0307	0.0067	4.59e-06
acetylcarnitine	rs7579950	A	G	-0.0649	0.0142	4.58e-06
acetylcarnitine	rs6596047	A	G	0.0273	0.006	4.54e-06
acetylcarnitine	rs4594848	A	C	-0.0116	0.0025	4.1e-06
acetylcarnitine	rs3844312	T	C	-0.0116	0.0025	4.1e-06
acetylcarnitine	rs11951010	A	T	0.1171	0.0254	3.98e-06
acetylcarnitine	rs11186437	A	G	-0.0117	0.0025	3.88e-06
acetylcarnitine	rs10989419	T	C	0.0125	0.0027	3.82e-06
acetylcarnitine	rs9791170	T	C	0.0119	0.0026	3.66e-06
acetylcarnitine	rs4976950	A	C	-0.068	0.0147	3.66e-06
acetylcarnitine	rs6583751	C	G	-0.0117	0.0025	3.6e-06
acetylcarnitine	rs10070034	A	G	-0.0311	0.0067	3.33e-06
acetylcarnitine	rs10040779	A	T	0.0283	0.0061	3.3e-06
acetylcarnitine	rs10478992	C	G	-0.0309	0.0066	3.2e-06
acetylcarnitine	rs10478991	T	C	0.0309	0.0066	3.2e-06
acetylcarnitine	rs17539510	A	C	0.0119	0.0026	3.19e-06
acetylcarnitine	rs7332276	T	G	-0.0178	0.0038	3.14e-06
acetylcarnitine	rs7711551	T	C	0.0311	0.0067	3.07e-06
acetylcarnitine	rs1016988	T	C	-0.0124	0.0027	2.89e-06
acetylcarnitine	rs12521097	A	G	-0.0118	0.0025	2.83e-06
acetylcarnitine	rs11599171	A	G	0.0123	0.0026	2.79e-06
acetylcarnitine	rs9348257	A	T	0.0121	0.0026	2.74e-06
acetylcarnitine	rs10078535	A	G	0.0316	0.0067	2.68e-06
acetylcarnitine	rs1171660	A	G	-0.0121	0.0026	2.39e-06
acetylcarnitine	rs11950562	A	C	0.0119	0.0025	2.34e-06
acetylcarnitine	rs1564348	T	C	0.0128	0.0027	2.24e-06
acetylcarnitine	rs10038843	A	G	-0.0289	0.0061	1.97e-06
acetylcarnitine	rs6596038	A	T	-0.0316	0.0066	1.94e-06
acetylcarnitine	rs10073675	A	T	-0.029	0.0061	1.87e-06
acetylcarnitine	rs10045575	T	C	-0.029	0.0061	1.81e-06
acetylcarnitine	rs1655914	T	C	-0.0307	0.0064	1.7e-06
acetylcarnitine	rs3843502	A	G	-0.0323	0.0067	1.63e-06
acetylcarnitine	rs10052554	T	G	0.0323	0.0067	1.63e-06
acetylcarnitine	rs1171659	A	G	-0.0125	0.0026	1.52e-06
acetylcarnitine	rs886286	A	G	-0.0128	0.0027	1.48e-06
acetylcarnitine	rs1171606	A	G	0.0125	0.0026	1.47e-06
acetylcarnitine	rs10826342	T	G	0.0125	0.0026	1.47e-06
acetylcarnitine	rs2706383	A	G	0.0127	0.0026	1.46e-06
acetylcarnitine	rs2405528	A	G	0.0127	0.0026	1.46e-06
acetylcarnitine	rs11006679	A	G	0.0126	0.0026	1.35e-06
acetylcarnitine	rs1655902	A	G	-0.0295	0.0061	1.29e-06
acetylcarnitine	rs10900807	C	G	0.0129	0.0027	1.27e-06
acetylcarnitine	rs2106854	T	C	0.0129	0.0027	1.26e-06
acetylcarnitine	rs2893807	T	C	-0.0126	0.0026	1.23e-06
acetylcarnitine	rs1904071	T	G	-0.0126	0.0026	1.16e-06
acetylcarnitine	rs1473072	A	G	-0.0125	0.0026	1.1e-06
acetylcarnitine	rs2057655	A	G	0.013	0.0027	1.03e-06
acetylcarnitine	rs10036208	T	C	0.0126	0.0026	1.01e-06
acetylcarnitine	rs2242206	T	G	0.0127	0.0026	9.98e-07
acetylcarnitine	rs2522056	A	G	0.013	0.0026	8.77e-07
acetylcarnitine	rs2706381	T	C	0.0131	0.0026	7.32e-07
acetylcarnitine	rs6874639	A	G	-0.0132	0.0026	6.2e-07
acetylcarnitine	rs10037469	T	G	0.0302	0.006	5.97e-07
acetylcarnitine	rs635619	A	G	0.015	0.003	5.73e-07
acetylcarnitine	rs274571	A	G	-0.015	0.003	5.73e-07
acetylcarnitine	rs2631363	A	G	-0.015	0.003	5.73e-07
acetylcarnitine	rs2631359	T	C	0.015	0.003	5.73e-07
acetylcarnitine	rs2631361	A	C	0.015	0.003	5.73e-07
acetylcarnitine	rs270612	A	G	-0.015	0.003	5.73e-07
acetylcarnitine	rs7730247	A	C	-0.0133	0.0026	5.4e-07
acetylcarnitine	rs1012793	C	G	0.0133	0.0026	5.4e-07
acetylcarnitine	rs10463891	A	G	0.0128	0.0026	5.18e-07
acetylcarnitine	rs162907	A	G	-0.013	0.0026	4.4e-07
acetylcarnitine	rs11242111	A	G	-0.0258	0.0051	4.09e-07
acetylcarnitine	rs6596075	C	G	0.017	0.0034	3.96e-07
acetylcarnitine	rs1004234	A	G	-0.0263	0.0052	3.96e-07
acetylcarnitine	rs13189284	A	C	-0.0265	0.0052	3.91e-07
acetylcarnitine	rs162894	T	G	0.0131	0.0026	3.91e-07
acetylcarnitine	rs1981525	T	C	-0.0261	0.0051	3.56e-07
acetylcarnitine	rs2706395	A	T	-0.0135	0.0027	3.27e-07
acetylcarnitine	rs2522047	T	G	0.0135	0.0027	3.27e-07
acetylcarnitine	rs2522050	T	C	0.0135	0.0027	3.27e-07
acetylcarnitine	rs757105	T	C	0.0135	0.0027	3.27e-07
acetylcarnitine	rs81598	C	G	0.0131	0.0026	3.04e-07
acetylcarnitine	rs662138	C	G	0.0139	0.0027	2.95e-07
acetylcarnitine	rs2522054	T	G	0.0136	0.0027	2.76e-07
acetylcarnitine	rs2706339	T	G	0.0136	0.0027	2.73e-07
acetylcarnitine	rs1171658	A	G	-0.0133	0.0026	2.68e-07
acetylcarnitine	rs2522063	T	G	0.0137	0.0027	2.58e-07
acetylcarnitine	rs2522064	A	G	0.0137	0.0027	2.58e-07
acetylcarnitine	rs2522062	A	G	-0.0137	0.0027	2.58e-07
acetylcarnitine	rs2706373	T	C	0.0137	0.0027	2.57e-07
acetylcarnitine	rs7716905	A	G	0.0316	0.006	1.53e-07
acetylcarnitine	rs162904	T	C	0.0136	0.0026	1.4e-07
acetylcarnitine	rs1007602	T	C	0.0136	0.0026	1.13e-07
acetylcarnitine	rs3900945	T	C	0.0141	0.0026	3.78e-08
acetylcarnitine	rs162890	T	C	0.0144	0.0026	2.68e-08
acetylcarnitine	rs162892	A	G	0.0145	0.0026	2.47e-08
acetylcarnitine	rs7727038	T	C	-0.0144	0.0025	9.67e-09
acetylcarnitine	rs7727544	T	C	-0.0144	0.0025	9.6e-09
acetylcarnitine	rs274549	A	C	-0.0161	0.0027	3.32e-09
acetylcarnitine	rs2631372	C	G	0.0154	0.0026	3.08e-09
acetylcarnitine	rs270607	A	G	0.0155	0.0026	1.56e-09
acetylcarnitine	rs274551	T	C	-0.0164	0.0027	1.34e-09
acetylcarnitine	rs2631362	A	G	-0.0157	0.0026	1.22e-09
acetylcarnitine	rs274548	T	C	-0.0164	0.0027	1.2e-09
acetylcarnitine	rs2405522	A	G	-0.0164	0.0027	1.13e-09
acetylcarnitine	rs6893782	A	C	0.0164	0.0027	1.13e-09
acetylcarnitine	rs274547	A	T	-0.0165	0.0027	1.08e-09
acetylcarnitine	rs7705826	T	G	-0.0164	0.0027	1.04e-09
acetylcarnitine	rs274553	C	G	0.0165	0.0027	9.91e-10
acetylcarnitine	rs274570	T	C	0.0159	0.0026	9.81e-10
acetylcarnitine	rs272888	T	C	0.0157	0.0026	9.37e-10
acetylcarnitine	rs272892	T	C	-0.0157	0.0026	9.37e-10
acetylcarnitine	rs273915	C	G	-0.0157	0.0026	9.08e-10
acetylcarnitine	rs273916	A	C	-0.0157	0.0026	9.01e-10
acetylcarnitine	rs270601	T	C	0.0158	0.0026	8.41e-10
acetylcarnitine	rs272874	T	C	-0.0159	0.0026	7.91e-10
acetylcarnitine	rs272868	C	G	0.0158	0.0026	7.59e-10
acetylcarnitine	rs272882	T	G	-0.0158	0.0026	7.48e-10
acetylcarnitine	rs272880	T	C	-0.0158	0.0026	7.41e-10
acetylcarnitine	rs272878	T	C	0.0158	0.0026	6.8e-10
acetylcarnitine	rs156322	T	C	-0.016	0.0026	4.16e-10
acetylcarnitine	rs671473	A	C	0.0161	0.0026	3.99e-10
acetylcarnitine	rs274552	C	G	0.017	0.0027	3.83e-10
acetylcarnitine	rs273901	T	G	-0.0162	0.0026	2.97e-10
acetylcarnitine	rs183898	C	G	-0.0163	0.0026	2.54e-10
acetylcarnitine	rs270606	A	G	0.0162	0.0026	2.54e-10
acetylcarnitine	rs273912	T	G	-0.0163	0.0026	2.43e-10
acetylcarnitine	rs2897160	T	C	0.0172	0.0027	2.11e-10
acetylcarnitine	rs274554	T	C	-0.0172	0.0027	1.86e-10
acetylcarnitine	rs273911	C	G	0.0164	0.0026	1.51e-10
acetylcarnitine	rs272887	A	G	0.0164	0.0026	1.5e-10
acetylcarnitine	rs274557	T	C	-0.0162	0.0025	1.44e-10
acetylcarnitine	rs274558	A	G	-0.0162	0.0025	1.43e-10
acetylcarnitine	rs274559	A	G	-0.0163	0.0025	1.42e-10
acetylcarnitine	rs272883	A	G	0.0165	0.0026	1.19e-10
acetylcarnitine	rs274550	T	G	0.0174	0.0027	9.97e-11
acetylcarnitine	rs272872	A	G	0.0167	0.0026	9.38e-11
acetylcarnitine	rs2631370	T	C	-0.0164	0.0025	9.2e-11
acetylcarnitine	rs274561	A	C	0.0164	0.0025	7.62e-11
acetylcarnitine	rs274546	A	G	0.0165	0.0025	6.02e-11
acetylcarnitine	rs274562	C	G	0.0165	0.0025	5.72e-11
acetylcarnitine	rs274560	T	C	-0.0166	0.0025	5.28e-11
acetylcarnitine	rs270605	T	C	-0.0166	0.0025	4.4e-11
acetylcarnitine	rs272865	A	T	-0.0167	0.0025	3.85e-11
acetylcarnitine	rs272867	A	G	-0.0167	0.0025	3.76e-11
acetylcarnitine	rs272875	T	C	0.0167	0.0025	3.69e-11
acetylcarnitine	rs272884	C	G	-0.0167	0.0025	3.59e-11
acetylcarnitine	rs272879	C	G	0.0167	0.0025	3.59e-11
acetylcarnitine	rs272881	A	G	-0.0167	0.0025	3.59e-11
acetylcarnitine	rs272886	T	C	0.0167	0.0025	3.51e-11
acetylcarnitine	rs273913	T	C	0.0169	0.0025	3.01e-11
acetylcarnitine	rs272842	A	G	0.0169	0.0025	2.97e-11
acetylcarnitine	rs272869	A	G	0.0168	0.0025	2.66e-11
acetylcarnitine	rs273914	A	T	0.0168	0.0025	2.39e-11
acetylcarnitine	rs272893	T	C	0.0169	0.0025	2.09e-11
acetylcarnitine	rs272889	A	G	0.0169	0.0025	2.05e-11
acetylcarnitine	rs270602	T	C	0.0169	0.0025	1.83e-11
acetylcarnitine	rs270613	A	G	0.0172	0.0025	1.13e-11
acetylcarnitine	rs419291	T	C	0.0173	0.0025	9.83e-12
acetylcarnitine	rs274567	T	C	0.0176	0.0025	2.85e-12
acetylcarnitine	rs7094971	A	G	0.0252	0.0027	2.86e-20
acetylcarnitine	rs1171620	C	G	-0.0263	0.0028	1.98e-20
acetylcarnitine	rs1171619	A	G	-0.0263	0.0028	1.95e-20
acetylcarnitine	rs12772586	T	C	0.0262	0.0027	1.42e-21
acetylcarnitine	rs753762	A	G	-0.0262	0.0027	1.05e-21
acetylcarnitine	rs12356193	A	G	0.027	0.0027	4.01e-23
acetylcarnitine	rs1171617	T	G	0.0279	0.0028	3.46e-23
acetylcarnitine	rs1171616	T	G	0.0279	0.0028	3.42e-23
acetylcarnitine	rs1171615	T	C	0.0279	0.0028	3.4e-23
acetylcarnitine	rs1171614	T	C	-0.0279	0.0028	3.38e-23
adrenate	rs11757776	C	G	0.0154	0.0035	9.63e-06
adrenate	rs17203317	T	G	-0.0739	0.0166	8.81e-06
adrenate	rs174626	A	G	0.0152	0.0034	8.68e-06
adrenate	rs12159536	T	C	-0.052	0.0117	8.18e-06
adrenate	rs11784756	T	C	0.0272	0.0061	8.05e-06
adrenate	rs6006238	T	C	-0.0521	0.0117	7.98e-06
adrenate	rs6006239	A	G	-0.0521	0.0117	7.89e-06
adrenate	rs11620434	A	C	0.033	0.0074	7.31e-06
adrenate	rs11761213	T	G	0.0162	0.0036	7.25e-06
adrenate	rs12531203	T	C	-0.0162	0.0036	7.24e-06
adrenate	rs11206335	A	G	-0.0268	0.006	6.72e-06
adrenate	rs2521567	A	G	-0.0154	0.0034	6.5e-06
adrenate	rs6006250	T	C	-0.0532	0.0118	6.49e-06
adrenate	rs831471	A	G	-0.0162	0.0036	6.44e-06
adrenate	rs174611	T	C	0.016	0.0035	6.14e-06
adrenate	rs1689956	T	G	0.0255	0.0056	5.39e-06
adrenate	rs422249	T	C	-0.0159	0.0035	5e-06
adrenate	rs174450	T	G	0.0156	0.0034	4.81e-06
adrenate	rs174616	A	G	-0.0155	0.0034	4.51e-06
adrenate	rs1689955	T	C	0.0258	0.0056	4.29e-06
adrenate	rs2845573	A	G	0.0274	0.0059	3.63e-06
adrenate	rs2526678	A	G	-0.0281	0.0061	3.62e-06
adrenate	rs13192201	A	T	0.0165	0.0035	2.34e-06
adrenate	rs7812874	T	C	-0.0255	0.0053	1.41e-06
adrenate	rs174583	T	C	-0.0297	0.0061	1.03e-06
adrenate	rs174605	T	G	-0.0174	0.0036	9.02e-07
adrenate	rs6987121	A	G	-0.0263	0.0053	7.59e-07
adrenate	rs12359572	T	G	0.0177	0.0036	6.26e-07
adrenate	rs2851682	A	G	0.0272	0.0054	4.94e-07
adrenate	rs174449	A	G	0.0181	0.0035	2.48e-07
adrenate	rs968567	T	C	-0.0232	0.0044	1.45e-07
adrenate	rs2524299	A	T	0.0279	0.0051	5.21e-08
adrenate	rs174448	A	G	0.0188	0.0035	5.2e-08
adrenate	rs2727271	A	T	0.0299	0.0051	5.53e-09
adrenate	rs2727270	T	C	-0.0299	0.0051	5.41e-09
adrenate	rs2072114	A	G	0.0268	0.0045	2.75e-09
adrenate	rs149803	C	G	-0.0276	0.0045	7.05e-10
adrenate	rs174589	C	G	0.0281	0.0043	4.92e-11
adrenate	rs174585	A	G	-0.0287	0.0043	3.32e-11
adrenate	rs174591	A	T	-0.0285	0.0042	1.46e-11
adrenate	rs174570	T	C	-0.032	0.0045	1.36e-12
adrenate	rs174532	A	G	0.0275	0.0037	9.11e-14
adrenate	rs174579	T	C	-0.0275	0.0036	3.82e-14
adrenate	rs174575	C	G	0.0302	0.0036	3.03e-17
adrenate	rs174534	A	G	0.0295	0.0034	8.55e-18
adrenate	rs174548	C	G	0.0318	0.0035	6.81e-20
adrenate	rs108499	T	C	-0.0314	0.0034	6.48e-20
adrenate	rs174549	A	G	-0.0319	0.0035	6.19e-20
adrenate	rs174556	T	C	-0.0321	0.0035	4.08e-20
adrenate	rs174555	T	C	0.0321	0.0035	4.08e-20
adrenate	rs174538	A	G	-0.0328	0.0035	5.6e-21
adrenate	rs174528	T	C	0.0327	0.0034	8.91e-22
adrenate	rs174578	A	T	-0.0331	0.0034	8.12e-22
adrenate	rs174576	A	C	-0.0331	0.0034	7.72e-22
adrenate	rs4246215	T	G	-0.0332	0.0034	4.25e-22
adrenate	rs174577	A	C	-0.0335	0.0035	3.19e-22
adrenate	rs174601	T	C	-0.0339	0.0035	2.53e-22
adrenate	rs174541	T	C	0.0336	0.0034	1.32e-22
adrenate	rs174574	A	C	-0.034	0.0034	6.07e-23
adrenate	rs102275	T	C	0.0341	0.0035	5.19e-23
adrenate	rs174537	T	G	-0.0341	0.0035	5.19e-23
adrenate	rs174536	A	C	0.0341	0.0035	5.18e-23
adrenate	rs1535	A	G	0.0341	0.0034	5.18e-23
adrenate	rs174535	T	C	0.0341	0.0035	5.17e-23
adrenate	rs174546	T	C	-0.0341	0.0034	4.85e-23
adrenate	rs174545	C	G	0.0341	0.0034	4.83e-23
adrenate	rs174547	T	C	0.034	0.0034	4.56e-23
adrenate	rs174550	T	C	0.0347	0.0034	6.79e-24
alanine	rs1451333	A	G	-0.0078	0.0018	9.99e-06
alanine	rs3737097	T	C	0.0077	0.0017	9.89e-06
alanine	rs2762343	A	G	0.0077	0.0017	9.63e-06
alanine	rs1850267	T	C	0.0079	0.0018	9.56e-06
alanine	rs2150912	A	G	-0.0077	0.0017	9.24e-06
alanine	rs9462828	A	T	0.0077	0.0017	9.19e-06
alanine	rs9367164	A	G	0.0077	0.0017	9.17e-06
alanine	rs890231	A	G	0.0078	0.0018	9.04e-06
alanine	rs13030973	T	C	-0.0109	0.0024	8.32e-06
alanine	rs1858113	A	C	-0.008	0.0018	8.29e-06
alanine	rs10493693	T	G	0.0256	0.0057	8.02e-06
alanine	rs10211524	A	G	-0.0104	0.0023	7.99e-06
alanine	rs4317609	A	G	-0.0079	0.0018	7.98e-06
alanine	rs6582678	T	C	-0.0079	0.0018	7.89e-06
alanine	rs2465602	A	G	-0.0079	0.0018	7.8e-06
alanine	rs1348600	T	C	0.0115	0.0026	7.65e-06
alanine	rs6497167	T	G	0.0079	0.0018	7.64e-06
alanine	rs6706043	T	G	-0.0079	0.0018	7.33e-06
alanine	rs7993171	A	G	-0.0209	0.0047	7.33e-06
alanine	rs790732	A	G	-0.0106	0.0024	7.32e-06
alanine	rs4722004	T	C	0.0079	0.0018	7.3e-06
alanine	rs1997391	T	C	0.0079	0.0018	7.17e-06
alanine	rs9876174	T	C	0.0117	0.0026	7e-06
alanine	rs6461542	A	T	-0.0079	0.0018	6.95e-06
alanine	rs282152	A	G	-0.009	0.002	6.8e-06
alanine	rs2295689	A	G	-0.009	0.002	6.8e-06
alanine	rs785896	A	G	0.009	0.002	6.8e-06
alanine	rs10737153	A	C	0.0079	0.0017	6.73e-06
alanine	rs10086950	A	C	-0.008	0.0018	6.47e-06
alanine	rs10018581	T	C	0.0119	0.0026	6.43e-06
alanine	rs4405401	T	C	0.0079	0.0017	6.08e-06
alanine	rs1440327	T	C	-0.0082	0.0018	6e-06
alanine	rs11183644	T	G	0.0079	0.0017	5.82e-06
alanine	rs2316866	T	G	0.0085	0.0019	5.82e-06
alanine	rs6962350	T	G	0.008	0.0018	5.68e-06
alanine	rs421802	T	C	0.0079	0.0017	5.57e-06
alanine	rs9866434	A	T	0.008	0.0018	5.55e-06
alanine	rs998532	A	G	0.008	0.0018	5.36e-06
alanine	rs12466960	C	G	0.008	0.0018	5.32e-06
alanine	rs4650566	A	C	-0.0261	0.0057	5.32e-06
alanine	rs211962	T	C	-0.012	0.0026	5.31e-06
alanine	rs745358	T	C	-0.0108	0.0024	5.25e-06
alanine	rs12445569	A	G	0.0081	0.0018	5.24e-06
alanine	rs4650565	A	G	0.0261	0.0057	5.11e-06
alanine	rs8141975	T	C	-0.0226	0.0049	5.04e-06
alanine	rs9646969	T	G	-0.008	0.0018	5.03e-06
alanine	rs7929841	T	C	0.0081	0.0018	4.99e-06
alanine	rs485878	A	G	-0.0081	0.0018	4.67e-06
alanine	rs4650564	T	C	0.0263	0.0057	4.62e-06
alanine	rs790742	A	G	-0.0109	0.0024	4.56e-06
alanine	rs1566951	T	C	-0.0082	0.0018	4.52e-06
alanine	rs2064272	A	G	-0.0082	0.0018	4.49e-06
alanine	rs790733	T	C	0.0108	0.0024	4.47e-06
alanine	rs10752562	A	G	-0.008	0.0017	4.3e-06
alanine	rs3740643	A	C	-0.008	0.0017	4.24e-06
alanine	rs7137439	A	C	0.008	0.0017	4.19e-06
alanine	rs6734059	T	C	0.0114	0.0025	4.14e-06
alanine	rs6839120	A	G	0.0082	0.0018	4.03e-06
alanine	rs10173720	A	T	0.0114	0.0025	3.9e-06
alanine	rs4665385	T	C	-0.0119	0.0026	3.84e-06
alanine	rs2141371	A	G	0.0109	0.0024	3.84e-06
alanine	rs4665386	A	C	-0.0119	0.0026	3.61e-06
alanine	rs790738	T	C	-0.0109	0.0024	3.44e-06
alanine	rs703459	A	G	-0.0109	0.0024	3.43e-06
alanine	rs13023094	A	C	-0.0114	0.0024	3.16e-06
alanine	rs790741	A	G	-0.011	0.0024	3.1e-06
alanine	rs6053126	A	G	-0.014	0.003	3.06e-06
alanine	rs340657	T	C	0.0081	0.0017	3.06e-06
alanine	rs768732	A	G	0.011	0.0024	3.01e-06
alanine	rs768731	A	C	-0.011	0.0024	2.99e-06
alanine	rs4980554	A	G	0.0082	0.0017	2.87e-06
alanine	rs11704957	A	C	-0.0231	0.0049	2.85e-06
alanine	rs17106668	T	C	-0.0269	0.0057	2.73e-06
alanine	rs7191435	T	C	0.0084	0.0018	2.53e-06
alanine	rs1881394	A	G	-0.0121	0.0026	2.45e-06
alanine	rs4980555	C	G	0.0083	0.0017	2.3e-06
alanine	rs6547735	T	C	0.0136	0.0029	2.29e-06
alanine	rs6727388	A	G	-0.0116	0.0025	2.19e-06
alanine	rs6704596	A	G	0.0118	0.0025	2.19e-06
alanine	rs4616435	T	C	0.0116	0.0025	2.18e-06
alanine	rs3811644	A	G	0.0118	0.0025	2.18e-06
alanine	rs6727215	A	G	0.0116	0.0025	2.16e-06
alanine	rs965813	A	T	-0.0118	0.0025	2.15e-06
alanine	rs3989940	T	C	-0.0082	0.0017	2.08e-06
alanine	rs879493	T	C	-0.0084	0.0018	2.08e-06
alanine	rs1919129	C	G	0.0118	0.0025	1.99e-06
alanine	rs2141372	T	G	-0.0118	0.0025	1.85e-06
alanine	rs339805	T	G	0.0084	0.0018	1.73e-06
alanine	rs12532023	C	G	0.0162	0.0034	1.73e-06
alanine	rs1555794	T	C	-0.0084	0.0017	1.7e-06
alanine	rs12406028	C	G	0.0083	0.0017	1.67e-06
alanine	rs7712111	A	G	0.0084	0.0018	1.63e-06
alanine	rs1472935	A	T	0.0086	0.0018	1.62e-06
alanine	rs7571558	C	G	0.0119	0.0025	1.6e-06
alanine	rs1289671	A	G	-0.0084	0.0018	1.56e-06
alanine	rs11652554	T	C	0.0087	0.0018	1.52e-06
alanine	rs2272406	A	T	-0.0118	0.0024	1.52e-06
alanine	rs9582849	A	G	0.02	0.0041	1.34e-06
alanine	rs3761981	A	C	-0.0086	0.0018	1.27e-06
alanine	rs7755022	A	G	0.0086	0.0018	1.18e-06
alanine	rs1469272	A	C	0.0086	0.0018	1.09e-06
alanine	rs890228	A	G	0.0086	0.0018	1.06e-06
alanine	rs890230	T	C	0.0086	0.0018	1.06e-06
alanine	rs1562830	T	C	0.0165	0.0034	9.78e-07
alanine	rs12532144	A	G	0.0165	0.0034	9.76e-07
alanine	rs7777038	A	C	0.0165	0.0034	9.76e-07
alanine	rs4587804	A	G	-0.0086	0.0018	9.52e-07
alanine	rs11893991	A	G	0.0089	0.0018	8.89e-07
alanine	rs17106647	T	C	0.0282	0.0057	8.85e-07
alanine	rs7963807	A	G	-0.0086	0.0018	8.54e-07
alanine	rs2859420	T	C	-0.0087	0.0018	8.39e-07
alanine	rs651158	A	G	0.0087	0.0018	8.12e-07
alanine	rs4666000	T	C	-0.0117	0.0024	8.1e-07
alanine	rs2068834	T	C	-0.0117	0.0024	8.01e-07
alanine	rs3817588	T	C	0.0127	0.0026	7.35e-07
alanine	rs7791060	A	G	-0.0167	0.0034	6.96e-07
alanine	rs7968752	T	G	-0.0087	0.0018	6.91e-07
alanine	rs17520130	T	C	-0.0088	0.0018	6.85e-07
alanine	rs465152	A	G	-0.0087	0.0017	6.45e-07
alanine	rs2465216	T	C	-0.0088	0.0018	6.31e-07
alanine	rs10208529	A	T	-0.0119	0.0024	6.3e-07
alanine	rs4665382	T	C	-0.0119	0.0024	6.26e-07
alanine	rs1919127	T	C	-0.0119	0.0024	6.21e-07
alanine	rs1919128	A	G	-0.0119	0.0024	6.2e-07
alanine	rs12478841	A	G	-0.0119	0.0024	5.96e-07
alanine	rs7974413	T	C	-0.0088	0.0018	5.96e-07
alanine	rs6760250	A	G	0.0119	0.0024	5.95e-07
alanine	rs4665991	A	G	0.0119	0.0024	5.95e-07
alanine	rs13022873	A	C	-0.0119	0.0024	5.88e-07
alanine	rs4665383	C	G	-0.012	0.0024	5.83e-07
alanine	rs4665987	A	G	0.0119	0.0024	5.79e-07
alanine	rs1376493	T	C	-0.0089	0.0018	5.54e-07
alanine	rs1562864	A	G	0.0089	0.0018	5.53e-07
alanine	rs6483507	A	G	-0.0089	0.0018	5.51e-07
alanine	rs2384656	A	G	-0.0119	0.0024	5.38e-07
alanine	rs10881004	T	C	0.0087	0.0017	5.28e-07
alanine	rs7953233	A	T	-0.0088	0.0017	4.97e-07
alanine	rs11183625	T	C	-0.0087	0.0017	4.94e-07
alanine	rs4374015	T	C	-0.0087	0.0017	4.93e-07
alanine	rs1452269	A	G	-0.0089	0.0018	3.84e-07
alanine	rs2263487	T	C	-0.0088	0.0017	3.68e-07
alanine	rs1376492	A	T	0.009	0.0018	3.59e-07
alanine	rs2465207	A	T	-0.0089	0.0017	3.03e-07
alanine	rs11183630	A	G	-0.009	0.0018	2.94e-07
alanine	rs12467476	T	C	-0.0126	0.0024	1.38e-07
alanine	rs814295	A	G	0.0136	0.0026	1.36e-07
alanine	rs703462	C	G	0.0093	0.0018	1.06e-07
alanine	rs7967842	T	G	-0.0093	0.0018	1.06e-07
alanine	rs780092	A	G	0.0138	0.0026	8.74e-08
alanine	rs7954772	A	T	0.0094	0.0018	8.67e-08
alanine	rs7963399	T	C	0.0095	0.0018	5.83e-08
alanine	rs13002853	C	G	-0.0131	0.0024	4.39e-08
alanine	rs11183620	A	G	0.0098	0.0017	1.55e-08
alanine	rs1260333	A	G	0.0111	0.0017	1.75e-10
alanine	rs2911711	A	T	-0.0119	0.0017	9.2e-12
alanine	rs780093	T	C	0.0127	0.0017	2.8e-13
alanine	rs780094	T	C	0.0129	0.0018	1.56e-13
alanine	rs1260326	T	C	0.0131	0.0017	5.56e-14
allantoin	rs13217476	T	C	0.0203	0.0046	9.84e-06
allantoin	rs8184921	T	C	0.0165	0.0037	9.8e-06
allantoin	rs35351	A	G	0.0167	0.0038	8.94e-06
allantoin	rs35352	A	G	0.0167	0.0038	8.91e-06
allantoin	rs10492266	T	C	-0.0167	0.0038	8.78e-06
allantoin	rs11147404	T	G	0.0282	0.0063	8.69e-06
allantoin	rs2549842	T	C	-0.0206	0.0046	8.68e-06
allantoin	rs1881939	T	C	0.1057	0.0237	8.44e-06
allantoin	rs300480	A	C	-0.0206	0.0046	8.23e-06
allantoin	rs300482	A	G	-0.0207	0.0046	8.16e-06
allantoin	rs167277	A	C	-0.0207	0.0046	7.92e-06
allantoin	rs1499094	T	G	0.0208	0.0046	7.68e-06
allantoin	rs17670629	A	G	0.0206	0.0046	7.46e-06
allantoin	rs10099629	C	G	0.0206	0.0046	6.98e-06
allantoin	rs972709	A	C	0.0483	0.0107	6.73e-06
allantoin	rs13257578	C	G	-0.0246	0.0054	5.83e-06
allantoin	rs9838937	A	G	-0.017	0.0037	5.8e-06
allantoin	rs10094936	A	G	-0.0211	0.0046	5.71e-06
allantoin	rs1447307	T	G	-0.0211	0.0046	5.69e-06
allantoin	rs1451071	A	G	0.0209	0.0046	5.68e-06
allantoin	rs4579742	A	T	0.029	0.0064	5.16e-06
allantoin	rs12189555	A	T	0.021	0.0046	5.06e-06
allantoin	rs7623728	T	C	-0.0172	0.0037	4.3e-06
allantoin	rs1881940	T	G	0.1034	0.0224	3.97e-06
allantoin	rs2293319	T	C	-0.0219	0.0047	3.59e-06
allantoin	rs1431793	A	C	-0.0216	0.0046	2.9e-06
allantoin	rs1799412	C	G	-0.0262	0.0055	2.28e-06
allantoin	rs12132798	C	G	0.0615	0.013	2.09e-06
allantoin	rs12126346	C	G	-0.0615	0.013	2.09e-06
allantoin	rs1320934	A	T	0.1215	0.0253	1.51e-06
allantoin	rs12718598	T	C	0.018	0.0037	1.49e-06
allantoin	rs7301836	T	G	0.0225	0.0046	1.09e-06
allantoin	rs10505968	T	C	0.0227	0.0046	9.23e-07
allantoin	rs9834988	T	C	0.0185	0.0038	7.98e-07
allantoin	rs7301856	T	C	0.0229	0.0046	7.55e-07
allantoin	rs10842570	T	C	0.0229	0.0046	7.53e-07
allantoin	rs7135011	T	C	0.0229	0.0046	7.44e-07
allantoin	rs11830780	A	T	-0.0229	0.0046	7.44e-07
allantoin	rs8108144	T	G	-0.0232	0.0047	6.44e-07
allantoin	rs10505969	A	T	0.023	0.0046	6.42e-07
allantoin	rs10842571	T	C	0.0232	0.0047	6.4e-07
allantoin	rs7959386	A	G	0.0237	0.0046	2.89e-07
allantoin	rs10771223	A	G	0.0237	0.0046	2.87e-07
arabinose	rs33976862	C	G	0.0602	0.0135	7.76e-06
arabinose	rs13141546	A	T	-0.0766	0.0171	7.31e-06
arabinose	rs7790791	T	C	0.0594	0.013	4.67e-06
arabinose	rs2313872	T	G	-0.1966	0.0425	3.83e-06
arabinose	rs12091176	A	G	0.127	0.0271	2.81e-06
arabinose	rs491459	C	G	-0.025	0.0053	2.34e-06
arabinose	rs12426131	A	G	0.0246	0.0051	1.68e-06
arabinose	rs526744	T	C	-0.021	0.0042	7.14e-07
arginine	rs12127977	C	G	-0.0153	0.0035	9.79e-06
arginine	rs6479442	A	C	0.0101	0.0023	9.59e-06
arginine	rs2916142	T	C	-0.0101	0.0023	9.38e-06
arginine	rs2916148	A	G	-0.0101	0.0023	9.24e-06
arginine	rs7036499	T	C	0.0217	0.0049	8.86e-06
arginine	rs12985777	T	C	-0.0141	0.0032	8.86e-06
arginine	rs10921131	T	C	-0.0137	0.0031	7.92e-06
arginine	rs2933871	A	G	0.0178	0.004	7.65e-06
arginine	rs1335103	A	C	0.0103	0.0023	7.62e-06
arginine	rs1577376	T	G	-0.0103	0.0023	7.61e-06
arginine	rs9537490	T	C	0.0103	0.0023	7.6e-06
arginine	rs2050400	A	G	-0.0103	0.0023	7.6e-06
arginine	rs10922038	T	C	0.0102	0.0023	7.57e-06
arginine	rs6920504	T	C	-0.0135	0.003	7.53e-06
arginine	rs7319121	T	G	0.0103	0.0023	7.52e-06
arginine	rs4513233	A	G	-0.0134	0.003	7.5e-06
arginine	rs16844874	T	C	0.0134	0.003	7.5e-06
arginine	rs7989726	T	G	0.0103	0.0023	7.48e-06
arginine	rs12061159	A	T	-0.0138	0.0031	7.34e-06
arginine	rs7535809	A	G	0.0138	0.0031	7.28e-06
arginine	rs9569548	T	C	0.0103	0.0023	7.25e-06
arginine	rs6141934	A	G	-0.0104	0.0023	7.23e-06
arginine	rs2965214	A	G	0.0105	0.0023	7.04e-06
arginine	rs2293683	A	G	-0.0105	0.0023	7.03e-06
arginine	rs17706531	A	G	0.0105	0.0023	6.97e-06
arginine	rs901271	C	G	-0.0104	0.0023	6.96e-06
arginine	rs860762	T	C	0.0117	0.0026	6.69e-06
arginine	rs12900341	A	G	-0.0104	0.0023	6.63e-06
arginine	rs4984288	T	C	-0.0104	0.0023	6.59e-06
arginine	rs4984286	T	C	-0.0104	0.0023	6.55e-06
arginine	rs901272	A	C	-0.0105	0.0023	6.49e-06
arginine	rs837763	T	C	0.0114	0.0025	6.03e-06
arginine	rs11115059	A	G	0.0294	0.0065	6.02e-06
arginine	rs12618928	T	C	0.0105	0.0023	5.28e-06
arginine	rs518709	T	C	0.0106	0.0023	4.69e-06
arginine	rs720118	T	C	-0.0105	0.0023	4.55e-06
arginine	rs16844839	T	C	-0.0138	0.003	4.51e-06
arginine	rs10490322	T	C	-0.0136	0.003	4.31e-06
arginine	rs10490323	A	G	-0.0136	0.003	4.31e-06
arginine	rs3815630	T	C	0.0136	0.003	4.31e-06
arginine	rs16844862	T	C	-0.0136	0.003	4.29e-06
arginine	rs1153903	A	G	-0.0106	0.0023	4.19e-06
arginine	rs12714263	A	G	-0.0107	0.0023	3.98e-06
arginine	rs3861164	A	T	0.0107	0.0023	3.45e-06
arginine	rs7717247	A	C	0.0162	0.0035	3.35e-06
arginine	rs790780	A	G	0.0108	0.0023	3.18e-06
arginine	rs299518	A	C	-0.0108	0.0023	3.14e-06
arginine	rs4242998	A	T	-0.0107	0.0023	3.1e-06
arginine	rs9527546	A	G	0.0108	0.0023	3.02e-06
arginine	rs182451	A	C	-0.0108	0.0023	3.01e-06
arginine	rs10490325	C	G	0.014	0.003	2.94e-06
arginine	rs10206976	T	G	-0.014	0.003	2.74e-06
arginine	rs1413999	A	C	0.0108	0.0023	2.73e-06
arginine	rs1335105	A	T	-0.0109	0.0023	2.51e-06
arginine	rs2781668	T	C	0.0174	0.0037	2.44e-06
arginine	rs790776	T	C	0.0109	0.0023	2.41e-06
arginine	rs3011362	A	G	-0.0349	0.0074	2.37e-06
arginine	rs6561898	A	C	0.0109	0.0023	2.32e-06
arginine	rs6059244	A	G	0.0109	0.0023	2.28e-06
arginine	rs6561901	A	G	-0.0109	0.0023	2.25e-06
arginine	rs2180566	T	C	-0.0109	0.0023	2.11e-06
arginine	rs6561899	A	T	0.011	0.0023	1.84e-06
arginine	rs11114987	T	C	-0.0324	0.0067	1.41e-06
arginine	rs2216405	A	G	0.0145	0.003	1.08e-06
arginine	rs511304	A	C	0.0191	0.0039	1.01e-06
arginine	rs715	T	C	0.0144	0.0028	2.9e-07
arginine	rs2246012	T	C	-0.0166	0.0032	2.23e-07
asparagine	rs12934550	A	G	-0.0079	0.0018	9.99e-06
asparagine	rs12934578	A	G	-0.0079	0.0018	9.98e-06
asparagine	rs8432	A	G	0.0079	0.0018	9.67e-06
asparagine	rs13269603	T	C	-0.0114	0.0026	9.61e-06
asparagine	rs724247	A	T	-0.0113	0.0026	9.54e-06
asparagine	rs6947443	T	C	0.0079	0.0018	9.49e-06
asparagine	rs2530162	T	G	0.0079	0.0018	9.4e-06
asparagine	rs520306	T	C	0.0147	0.0033	9.33e-06
asparagine	rs512721	A	G	-0.0147	0.0033	9.28e-06
asparagine	rs11154277	T	G	-0.0079	0.0018	9.24e-06
asparagine	rs2178198	T	C	-0.0118	0.0026	8.93e-06
asparagine	rs11863922	A	G	0.0115	0.0026	8.68e-06
asparagine	rs4701742	T	C	-0.0079	0.0018	8.65e-06
asparagine	rs1957025	A	G	-0.0079	0.0018	8.61e-06
asparagine	rs17123860	A	G	-0.0554	0.0125	8.6e-06
asparagine	rs12327010	A	G	-0.0105	0.0024	8.45e-06
asparagine	rs3776434	A	C	-0.0079	0.0018	8.44e-06
asparagine	rs3756429	A	G	-0.0079	0.0018	8.43e-06
asparagine	rs735812	T	C	0.0116	0.0026	8.37e-06
asparagine	rs7681514	A	G	-0.0079	0.0018	8.31e-06
asparagine	rs7840898	T	G	0.0115	0.0026	8.23e-06
asparagine	rs7822643	A	G	0.0115	0.0026	8.14e-06
asparagine	rs2628438	A	G	0.008	0.0018	8.12e-06
asparagine	rs2976480	A	C	0.0802	0.018	8e-06
asparagine	rs10454287	A	T	-0.008	0.0018	7.96e-06
asparagine	rs12241172	T	C	0.0082	0.0018	7.58e-06
asparagine	rs17123845	T	C	0.0568	0.0127	7.45e-06
asparagine	rs8548	A	C	0.0108	0.0024	7.33e-06
asparagine	rs1450700	A	G	-0.0568	0.0126	7.06e-06
asparagine	rs1450699	A	G	-0.0568	0.0126	7.05e-06
asparagine	rs17123849	T	C	-0.0568	0.0126	7.03e-06
asparagine	rs8014422	A	G	0.0568	0.0126	7.02e-06
asparagine	rs7445640	T	G	0.008	0.0018	6.95e-06
asparagine	rs1324707	A	G	-0.009	0.002	6.8e-06
asparagine	rs1797387	A	G	-0.008	0.0018	6.71e-06
asparagine	rs2631738	A	G	-0.0079	0.0018	6.68e-06
asparagine	rs8014705	A	G	0.052	0.0115	6.46e-06
asparagine	rs716764	T	C	-0.0117	0.0026	6.46e-06
asparagine	rs1229560	C	G	-0.008	0.0018	6.28e-06
asparagine	rs1229540	A	G	0.008	0.0018	6.24e-06
asparagine	rs12136030	T	C	-0.008	0.0018	6.23e-06
asparagine	rs12149693	A	T	0.0116	0.0026	6.21e-06
asparagine	rs10503601	T	C	-0.0214	0.0047	6.17e-06
asparagine	rs13174601	T	C	0.0604	0.0134	6.15e-06
asparagine	rs17019962	A	G	-0.0117	0.0026	6.15e-06
asparagine	rs2530156	A	G	-0.0083	0.0018	5.26e-06
asparagine	rs11778747	T	C	-0.0194	0.0043	5.25e-06
asparagine	rs16943890	T	C	0.0117	0.0026	5.14e-06
asparagine	rs313125	A	G	-0.0117	0.0026	5.13e-06
asparagine	rs2513039	T	C	0.0081	0.0018	4.85e-06
asparagine	rs834840	T	C	0.0116	0.0025	4.83e-06
asparagine	rs7198334	T	C	-0.0117	0.0026	4.8e-06
asparagine	rs6657621	T	C	0.0081	0.0018	4.77e-06
asparagine	rs1570536	T	C	-0.0081	0.0018	4.75e-06
asparagine	rs1535704	A	T	0.0081	0.0018	4.74e-06
asparagine	rs2761243	T	C	-0.0081	0.0018	4.74e-06
asparagine	rs936755	A	C	0.0081	0.0018	4.74e-06
asparagine	rs3737899	T	G	-0.0081	0.0018	4.68e-06
asparagine	rs2688230	T	C	0.0081	0.0018	4.56e-06
asparagine	rs2688228	T	C	0.0081	0.0018	4.42e-06
asparagine	rs780094	T	C	-0.0081	0.0018	4.39e-06
asparagine	rs16848001	T	C	-0.0199	0.0043	4.39e-06
asparagine	rs834841	T	C	0.0117	0.0025	4.36e-06
asparagine	rs2113187	A	T	0.0117	0.0026	4.34e-06
asparagine	rs431057	A	C	-0.0082	0.0018	4.32e-06
asparagine	rs4888479	A	G	0.0117	0.0025	4.24e-06
asparagine	rs4906356	T	C	-0.0111	0.0024	4.03e-06
asparagine	rs3212090	T	C	-0.0111	0.0024	4.02e-06
asparagine	rs13259125	T	C	-0.0082	0.0018	4.02e-06
asparagine	rs4900590	T	C	-0.0111	0.0024	3.99e-06
asparagine	rs7632237	A	G	0.0117	0.0025	3.93e-06
asparagine	rs780093	T	C	-0.0081	0.0018	3.91e-06
asparagine	rs2273175	T	C	0.0111	0.0024	3.82e-06
asparagine	rs2245730	A	C	-0.0082	0.0018	3.82e-06
asparagine	rs1416239	T	C	0.0082	0.0018	3.69e-06
asparagine	rs1338576	T	C	-0.0082	0.0018	3.69e-06
asparagine	rs12663966	A	T	-0.0083	0.0018	3.64e-06
asparagine	rs4896596	T	C	0.0082	0.0018	3.64e-06
asparagine	rs7626250	T	C	-0.0118	0.0025	3.58e-06
asparagine	rs3842942	T	C	0.0119	0.0026	3.56e-06
asparagine	rs3818852	A	T	-0.0082	0.0018	3.56e-06
asparagine	rs11846404	C	G	0.0111	0.0024	3.36e-06
asparagine	rs2463822	T	C	-0.0151	0.0032	3.13e-06
asparagine	rs1528730	A	C	-0.0151	0.0032	3e-06
asparagine	rs2513747	T	C	-0.0152	0.0032	2.92e-06
asparagine	rs2911711	A	T	0.0083	0.0018	2.85e-06
asparagine	rs6679985	C	G	0.0083	0.0018	2.72e-06
asparagine	rs6674294	T	C	-0.0084	0.0018	2.72e-06
asparagine	rs6683094	A	G	0.0084	0.0018	2.72e-06
asparagine	rs2513038	A	C	-0.0152	0.0032	2.66e-06
asparagine	rs4305952	C	G	0.0084	0.0018	2.65e-06
asparagine	rs1229569	A	G	-0.0116	0.0025	2.65e-06
asparagine	rs11126005	A	G	0.0083	0.0018	2.61e-06
asparagine	rs2246920	T	G	-0.0155	0.0033	2.61e-06
asparagine	rs2140336	A	G	0.0083	0.0018	2.52e-06
asparagine	rs2002860	C	G	0.0083	0.0018	2.52e-06
asparagine	rs1287505	A	G	0.0083	0.0018	2.52e-06
asparagine	rs11865240	T	G	-0.0085	0.0018	2.38e-06
asparagine	rs4908005	T	G	0.0084	0.0018	2.28e-06
asparagine	rs1785640	T	C	-0.0085	0.0018	2.25e-06
asparagine	rs1034145	A	C	0.0084	0.0018	2.24e-06
asparagine	rs2372474	A	G	0.0083	0.0018	2.24e-06
asparagine	rs1287514	A	G	0.0084	0.0018	2.23e-06
asparagine	rs1287515	A	G	-0.0084	0.0018	2.23e-06
asparagine	rs1287516	C	G	0.0084	0.0018	2.23e-06
asparagine	rs978356	A	G	0.0084	0.0018	2.22e-06
asparagine	rs1298226	T	C	-0.0084	0.0018	2.22e-06
asparagine	rs1287570	A	G	0.0084	0.0018	2.21e-06
asparagine	rs1229541	A	C	-0.0117	0.0025	2.18e-06
asparagine	rs1229543	T	C	-0.0117	0.0025	2.17e-06
asparagine	rs2292503	A	G	0.0084	0.0018	2.12e-06
asparagine	rs1331646	A	G	0.0084	0.0018	2.11e-06
asparagine	rs1146979	A	C	0.0084	0.0018	2.11e-06
asparagine	rs1974562	T	C	-0.0117	0.0025	2.09e-06
asparagine	rs1146963	T	C	0.0084	0.0018	2.08e-06
asparagine	rs2631763	A	G	-0.0083	0.0018	2.06e-06
asparagine	rs954271	A	G	0.0084	0.0018	2.05e-06
asparagine	rs984441	A	G	-0.0085	0.0018	2.03e-06
asparagine	rs1146964	A	C	0.0084	0.0018	2.01e-06
asparagine	rs1757432	T	C	0.0084	0.0018	1.99e-06
asparagine	rs1478872	A	G	0.0084	0.0018	1.99e-06
asparagine	rs2631766	C	G	0.0084	0.0018	1.93e-06
asparagine	rs1287554	A	G	0.0084	0.0018	1.86e-06
asparagine	rs1287574	A	G	0.0084	0.0018	1.86e-06
asparagine	rs1287553	T	G	0.0084	0.0018	1.86e-06
asparagine	rs1287572	A	C	0.0084	0.0018	1.86e-06
asparagine	rs1287555	T	C	-0.0084	0.0018	1.86e-06
asparagine	rs1287551	T	C	0.0084	0.0018	1.85e-06
asparagine	rs1146962	T	C	-0.0085	0.0018	1.79e-06
asparagine	rs10444467	T	C	0.0086	0.0018	1.71e-06
asparagine	rs188611	A	G	0.0085	0.0018	1.67e-06
asparagine	rs11614753	T	C	-0.0958	0.02	1.6e-06
asparagine	rs6999788	A	T	0.0086	0.0018	1.57e-06
asparagine	rs1600057	T	C	0.0122	0.0025	1.56e-06
asparagine	rs1146975	A	G	0.0085	0.0018	1.55e-06
asparagine	rs1028777	A	C	-0.0086	0.0018	1.52e-06
asparagine	rs12824366	A	G	0.0086	0.0018	1.48e-06
asparagine	rs11828383	T	C	-0.0157	0.0033	1.47e-06
asparagine	rs4906376	A	C	0.0088	0.0018	1.31e-06
asparagine	rs1968814	T	C	0.0117	0.0024	1.12e-06
asparagine	rs7161226	A	C	-0.0652	0.0134	1.1e-06
asparagine	rs941948	A	G	0.0128	0.0026	1.07e-06
asparagine	rs2511224	T	C	-0.0087	0.0018	1.06e-06
asparagine	rs10133399	A	T	0.0115	0.0024	1.06e-06
asparagine	rs10747644	A	G	0.0087	0.0018	1.02e-06
asparagine	rs3847847	T	C	-0.0087	0.0018	1.02e-06
asparagine	rs6580890	A	G	-0.0087	0.0018	9.7e-07
asparagine	rs12833456	T	C	0.0087	0.0018	9.54e-07
asparagine	rs2153557	C	G	-0.0401	0.0082	9.42e-07
asparagine	rs4103862	A	G	-0.0087	0.0018	9.31e-07
asparagine	rs10876311	T	C	-0.0087	0.0018	9.23e-07
asparagine	rs2631767	A	T	-0.0088	0.0018	8.75e-07
asparagine	rs11170186	T	G	0.0087	0.0018	8.68e-07
asparagine	rs6737234	T	G	-0.0211	0.0043	8.66e-07
asparagine	rs6727893	A	G	0.0211	0.0043	8.65e-07
asparagine	rs6755681	T	C	-0.0211	0.0043	8.62e-07
asparagine	rs12822166	A	G	-0.0087	0.0018	8.48e-07
asparagine	rs2631769	A	G	-0.0087	0.0018	8.45e-07
asparagine	rs11170187	T	C	0.0087	0.0018	8.35e-07
asparagine	rs7956363	A	G	-0.0087	0.0018	8.35e-07
asparagine	rs7956582	A	G	-0.0087	0.0018	8.33e-07
asparagine	rs2631737	C	G	0.0087	0.0018	8.05e-07
asparagine	rs2688221	T	C	0.0087	0.0018	8.05e-07
asparagine	rs2631723	T	G	0.0087	0.0018	7.86e-07
asparagine	rs2688240	T	G	0.0087	0.0018	7.86e-07
asparagine	rs2513077	A	G	0.016	0.0032	7.77e-07
asparagine	rs12503034	A	G	0.0087	0.0018	7.42e-07
asparagine	rs12704947	A	T	-0.0089	0.0018	7.14e-07
asparagine	rs2665466	A	G	-0.0088	0.0018	7.1e-07
asparagine	rs1880025	A	G	0.0088	0.0018	7.05e-07
asparagine	rs1531507	A	G	0.0127	0.0026	6.67e-07
asparagine	rs1406384	T	C	0.0163	0.0033	6.35e-07
asparagine	rs2513737	C	G	0.0162	0.0032	6.04e-07
asparagine	rs11170195	T	C	0.0088	0.0018	5.99e-07
asparagine	rs11801253	A	G	-0.0094	0.0019	5.68e-07
asparagine	rs2245808	A	G	0.0088	0.0018	5.62e-07
asparagine	rs2511225	A	C	0.009	0.0018	5.53e-07
asparagine	rs2271101	A	G	-0.0088	0.0018	5.48e-07
asparagine	rs2513749	T	C	0.0163	0.0032	5.41e-07
asparagine	rs2513052	C	G	-0.0163	0.0032	5.41e-07
asparagine	rs1881535	T	C	0.0163	0.0032	5.38e-07
asparagine	rs2463836	A	G	-0.0163	0.0032	5.37e-07
asparagine	rs1049674	A	T	-0.0123	0.0025	5.28e-07
asparagine	rs17345286	T	C	0.0124	0.0025	5.07e-07
asparagine	rs2245515	T	C	0.0089	0.0018	4.89e-07
asparagine	rs11160770	T	G	0.0118	0.0023	4.88e-07
asparagine	rs2513037	A	T	0.0163	0.0032	4.84e-07
asparagine	rs954270	T	C	-0.0089	0.0018	4.42e-07
asparagine	rs2513071	A	C	-0.0167	0.0033	4.09e-07
asparagine	rs4690523	T	C	-0.009	0.0018	3.48e-07
asparagine	rs1338571	A	G	0.0091	0.0018	3.07e-07
asparagine	rs17157227	T	C	-0.0167	0.0033	3.07e-07
asparagine	rs10148180	C	G	-0.026	0.005	2.51e-07
asparagine	rs2631729	C	G	0.0091	0.0018	2.43e-07
asparagine	rs1744280	T	C	-0.0136	0.0026	2.32e-07
asparagine	rs7104149	A	G	0.0169	0.0033	1.93e-07
asparagine	rs1536873	A	G	-0.0093	0.0018	1.67e-07
asparagine	rs17791722	T	C	-0.0097	0.0018	5.76e-08
asparagine	rs722637	A	C	0.0097	0.0018	5.59e-08
asparagine	rs12885509	T	C	0.0097	0.0018	5.38e-08
asparagine	rs12883337	C	G	-0.0097	0.0018	5.34e-08
asparagine	rs10138768	A	G	0.0098	0.0018	4.81e-08
asparagine	rs12588797	T	C	0.0098	0.0018	4.32e-08
asparagine	rs1187417	T	C	-0.0099	0.0018	3.33e-08
asparagine	rs4906379	A	G	-0.0099	0.0018	3.31e-08
asparagine	rs3861678	A	G	-0.0099	0.0018	3.29e-08
asparagine	rs8015761	T	C	-0.0099	0.0018	2.81e-08
asparagine	rs2509973	A	C	-0.0099	0.0018	1.99e-08
asparagine	rs7119797	T	C	-0.0101	0.0018	1.01e-08
asparagine	rs3103098	C	G	0.0102	0.0018	8.4e-09
asparagine	rs4900597	T	C	-0.0104	0.0018	5.91e-09
asparagine	rs12891477	T	C	-0.0106	0.0018	4.31e-09
asparagine	rs3017098	A	G	0.0107	0.0018	1.48e-09
asparagine	rs10438243	A	G	-0.0108	0.0018	1.19e-09
asparagine	rs10438244	T	C	-0.0115	0.0018	1.88e-10
asparagine	rs6576010	A	G	-0.0116	0.0018	7.05e-11
asparagine	rs881057	T	G	-0.0116	0.0018	6.44e-11
asparagine	rs881056	A	G	0.0116	0.0018	6.44e-11
asparagine	rs8008020	T	C	-0.0117	0.0018	5.89e-11
asparagine	rs4144027	T	C	0.012	0.0018	1.33e-11
asparagine	rs4900601	T	C	-0.012	0.0018	1.24e-11
asparagine	rs4906421	A	G	0.019	0.002	2.1e-21
asparagine	rs1744286	A	G	0.029	0.003	4.18e-22
asparagine	rs941952	T	C	0.03	0.003	1.52e-23
asparagine	rs12587001	T	C	0.048	0.004	3.55e-33
asparagine	rs1744297	T	C	0.049	0.004	1.68e-34
asparagine	rs941954	A	G	0.0234	0.0019	4.52e-35
asparagine	rs737394	T	G	-0.05	0.004	7.47e-36
asparagine	rs2282377	C	G	-0.05	0.004	7.47e-36
asparagine	rs2011069	A	G	0.027	0.002	1.56e-41
aspartate	rs7242727	A	G	0.0247	0.0056	9.99e-06
aspartate	rs12954899	A	G	-0.0254	0.0057	8.84e-06
aspartate	rs13106192	C	G	0.0202	0.0045	7.35e-06
aspartate	rs4835638	A	T	-0.0472	0.0103	4.99e-06
aspartate	rs6854832	T	C	0.0472	0.0103	4.98e-06
aspartate	rs4888965	A	C	-0.0758	0.0164	4.01e-06
aspartate	rs7151520	T	C	-0.0269	0.0057	2.02e-06
aspartate	rs2271101	A	G	0.018	0.0037	1.27e-06
aspartate	rs4690523	T	C	0.0182	0.0037	1.04e-06
aspartate	rs7150776	T	C	0.0279	0.0057	9.22e-07
benzoate	rs9382939	T	C	0.0255	0.0058	1e-05
benzoate	rs10497003	T	C	0.0082	0.0018	9.61e-06
benzoate	rs7537216	A	T	-0.008	0.0018	9.5e-06
benzoate	rs11621904	T	C	0.0081	0.0018	9.48e-06
benzoate	rs1411907	T	C	0.0081	0.0018	9.35e-06
benzoate	rs8014112	T	C	0.0081	0.0018	9.35e-06
benzoate	rs309596	T	C	0.0082	0.0019	9.22e-06
benzoate	rs4353947	A	G	-0.0082	0.0018	8.7e-06
benzoate	rs3902191	T	G	0.012	0.0027	8.7e-06
benzoate	rs12519505	T	C	0.0082	0.0019	8.65e-06
benzoate	rs12520209	T	C	0.0082	0.0019	8.65e-06
benzoate	rs12899069	T	C	0.0131	0.0029	8.58e-06
benzoate	rs6540443	A	T	0.0081	0.0018	8.49e-06
benzoate	rs12987402	T	C	-0.008	0.0018	8.45e-06
benzoate	rs3771502	A	G	-0.012	0.0027	8.33e-06
benzoate	rs12565305	A	G	0.0202	0.0045	8.27e-06
benzoate	rs10755299	A	C	0.0083	0.0019	8.24e-06
benzoate	rs1151659	T	C	-0.0219	0.0049	8.24e-06
benzoate	rs4844394	T	C	0.0081	0.0018	8.21e-06
benzoate	rs12150754	C	G	0.0083	0.0019	7.7e-06
benzoate	rs3769012	A	G	0.0117	0.0026	7.58e-06
benzoate	rs724165	A	G	-0.008	0.0018	7.54e-06
benzoate	rs309154	T	C	0.0117	0.0026	7.45e-06
benzoate	rs6556206	A	G	0.0083	0.0019	7.44e-06
benzoate	rs4386719	T	C	-0.0083	0.0019	7.38e-06
benzoate	rs4662483	T	C	-0.0083	0.0019	7.37e-06
benzoate	rs1515262	T	C	-0.0083	0.0019	7.36e-06
benzoate	rs1515261	A	G	-0.0083	0.0019	7.34e-06
benzoate	rs10859973	A	G	-0.0123	0.0027	7.27e-06
benzoate	rs17010220	A	G	-0.0202	0.0045	7.19e-06
benzoate	rs12716314	T	G	0.0084	0.0019	6.88e-06
benzoate	rs12132780	T	C	0.0082	0.0018	6.82e-06
benzoate	rs12783167	T	C	-0.0081	0.0018	6.56e-06
benzoate	rs7908718	T	C	0.0084	0.0019	6.48e-06
benzoate	rs3131535	A	G	-0.0205	0.0045	6.3e-06
benzoate	rs9514739	C	G	-0.0122	0.0027	6.1e-06
benzoate	rs159486	T	C	0.012	0.0027	5.91e-06
benzoate	rs12568511	A	G	0.0123	0.0027	5.76e-06
benzoate	rs9859467	A	G	-0.0203	0.0045	5.75e-06
benzoate	rs11013865	T	C	0.0084	0.0019	5.42e-06
benzoate	rs660002	T	C	0.0119	0.0026	5.32e-06
benzoate	rs309113	A	C	0.0119	0.0026	5.22e-06
benzoate	rs3213890	A	G	0.0119	0.0026	5.17e-06
benzoate	rs2278682	C	G	0.0119	0.0026	5.17e-06
benzoate	rs309118	C	G	0.0119	0.0026	5.15e-06
benzoate	rs309133	A	C	-0.0119	0.0026	5.11e-06
benzoate	rs309122	A	G	-0.0119	0.0026	5.08e-06
benzoate	rs12475553	T	G	0.012	0.0026	4.98e-06
benzoate	rs219964	A	T	-0.0165	0.0036	4.92e-06
benzoate	rs309593	A	G	0.0084	0.0018	4.89e-06
benzoate	rs741708	A	G	0.0084	0.0018	4.7e-06
benzoate	rs309119	T	C	-0.0119	0.0026	4.63e-06
benzoate	rs8049624	A	G	0.0126	0.0028	4.58e-06
benzoate	rs12472293	T	C	-0.012	0.0026	4.54e-06
benzoate	rs9314172	C	G	-0.0084	0.0018	4.5e-06
benzoate	rs3769008	T	C	0.0119	0.0026	4.43e-06
benzoate	rs2839740	T	G	0.012	0.0026	4.43e-06
benzoate	rs10515641	A	G	-0.0086	0.0019	4.37e-06
benzoate	rs12373779	A	C	-0.0119	0.0026	4.37e-06
benzoate	rs9636213	A	G	-0.0119	0.0026	4.33e-06
benzoate	rs4741624	T	G	-0.0084	0.0018	4.19e-06
benzoate	rs1791600	T	C	-0.0087	0.0019	4.09e-06
benzoate	rs4672488	A	G	0.0086	0.0019	4.08e-06
benzoate	rs6711493	A	G	-0.012	0.0026	4.03e-06
benzoate	rs2322813	A	G	-0.0122	0.0027	3.97e-06
benzoate	rs309162	A	T	0.012	0.0026	3.95e-06
benzoate	rs1050115	A	G	-0.012	0.0026	3.95e-06
benzoate	rs3751264	A	G	0.0126	0.0027	3.91e-06
benzoate	rs4850051	A	G	-0.0086	0.0019	3.84e-06
benzoate	rs309159	T	C	0.012	0.0026	3.83e-06
benzoate	rs13151688	T	C	0.0085	0.0018	3.81e-06
benzoate	rs309158	A	G	-0.012	0.0026	3.79e-06
benzoate	rs12097666	T	C	0.0085	0.0018	3.76e-06
benzoate	rs309172	A	G	-0.0121	0.0026	3.73e-06
benzoate	rs3734271	T	G	0.0168	0.0036	3.73e-06
benzoate	rs11466229	A	G	0.0131	0.0028	3.7e-06
benzoate	rs309165	T	C	-0.0121	0.0026	3.67e-06
benzoate	rs3098102	T	C	0.0121	0.0026	3.61e-06
benzoate	rs4741625	A	G	0.0085	0.0018	3.5e-06
benzoate	rs3754689	T	C	0.0121	0.0026	3.45e-06
benzoate	rs6714884	A	G	-0.0084	0.0018	3.45e-06
benzoate	rs11838539	A	G	0.0284	0.0061	3.38e-06
benzoate	rs6724569	A	G	0.0121	0.0026	3.28e-06
benzoate	rs7607174	A	T	0.0122	0.0026	3.22e-06
benzoate	rs4951319	T	C	0.0085	0.0018	3.2e-06
benzoate	rs4762636	T	C	-0.0128	0.0027	2.87e-06
benzoate	rs7513165	T	C	0.0086	0.0018	2.83e-06
benzoate	rs1866411	A	C	-0.0085	0.0018	2.81e-06
benzoate	rs309161	A	G	0.0122	0.0026	2.8e-06
benzoate	rs969075	T	C	-0.0086	0.0018	2.63e-06
benzoate	rs310528	A	G	0.0086	0.0018	2.59e-06
benzoate	rs7283154	T	C	-0.0087	0.0018	2.32e-06
benzoate	rs2317834	T	G	0.0129	0.0027	2.31e-06
benzoate	rs17024799	T	C	0.013	0.0027	2.2e-06
benzoate	rs4762635	T	C	-0.013	0.0027	2.19e-06
benzoate	rs3911080	A	G	0.0128	0.0027	2.09e-06
benzoate	rs8008040	T	C	-0.0087	0.0018	2.06e-06
benzoate	rs16876152	T	G	-0.0089	0.0019	1.65e-06
benzoate	rs3764261	A	C	0.009	0.0019	1.52e-06
benzoate	rs10507063	C	G	-0.0133	0.0028	1.4e-06
benzoate	rs9357278	C	G	0.0178	0.0037	1.38e-06
benzoate	rs4515826	T	G	-0.0132	0.0027	1.31e-06
benzoate	rs310597	A	G	-0.0088	0.0018	1.3e-06
benzoate	rs10745735	A	G	0.0133	0.0027	1.15e-06
benzoate	rs6841005	T	C	0.0088	0.0018	1.15e-06
benzoate	rs3112496	T	C	0.0127	0.0026	1.13e-06
benzoate	rs10981455	A	G	-0.0089	0.0018	1.08e-06
benzoate	rs16826695	C	G	-0.009	0.0018	1.01e-06
benzoate	rs7561849	A	G	0.009	0.0018	1.01e-06
benzoate	rs6430144	T	C	-0.009	0.0018	1.01e-06
benzoate	rs16826701	A	G	0.009	0.0018	1.01e-06
benzoate	rs1950501	C	G	-0.0089	0.0018	6.81e-07
benzoate	rs10811042	A	T	0.0092	0.0018	5.06e-07
benzoate	rs17011280	A	G	-0.0138	0.0027	4.48e-07
benzoate	rs12637854	A	T	-0.0138	0.0027	4.33e-07
benzoate	rs9394526	A	G	-0.0187	0.0037	4.28e-07
benzoate	rs3765035	A	G	0.0092	0.0018	3.76e-07
benzoate	rs3849387	C	G	-0.0139	0.0027	2.19e-07
benzoate	rs4852620	A	G	0.0141	0.0027	1.73e-07
benzoate	rs247616	T	C	0.0098	0.0019	1.32e-07
beta-hydroxyisovalerate	rs4859271	T	C	0.0232	0.0052	9.97e-06
beta-hydroxyisovalerate	rs3209233	A	C	0.041	0.0093	9.95e-06
beta-hydroxyisovalerate	rs943251	T	G	0.0118	0.0027	9.9e-06
beta-hydroxyisovalerate	rs10937104	A	T	0.0117	0.0027	9.88e-06
beta-hydroxyisovalerate	rs872157	T	C	-0.0117	0.0026	9.73e-06
beta-hydroxyisovalerate	rs905112	A	C	-0.0117	0.0026	9.68e-06
beta-hydroxyisovalerate	rs9877549	T	C	-0.0231	0.0052	9.31e-06
beta-hydroxyisovalerate	rs13093344	C	G	-0.0118	0.0027	9.17e-06
beta-hydroxyisovalerate	rs4746017	A	C	0.0121	0.0027	8.64e-06
beta-hydroxyisovalerate	rs10494270	A	G	0.0119	0.0027	8.63e-06
beta-hydroxyisovalerate	rs2136331	A	G	-0.0119	0.0027	8.23e-06
beta-hydroxyisovalerate	rs2130791	A	G	0.0121	0.0027	7.96e-06
beta-hydroxyisovalerate	rs7178596	A	G	-0.012	0.0027	7.92e-06
beta-hydroxyisovalerate	rs6953928	T	C	-0.0236	0.0053	7.57e-06
beta-hydroxyisovalerate	rs7720978	T	C	0.0302	0.0067	7.51e-06
beta-hydroxyisovalerate	rs3823598	T	C	-0.0236	0.0053	7.43e-06
beta-hydroxyisovalerate	rs3778887	T	C	0.0237	0.0053	7.33e-06
beta-hydroxyisovalerate	rs11708349	A	G	-0.0228	0.0051	7.26e-06
beta-hydroxyisovalerate	rs10440984	A	G	-0.0121	0.0027	7.07e-06
beta-hydroxyisovalerate	rs12325299	C	G	0.0122	0.0027	6.94e-06
beta-hydroxyisovalerate	rs4979071	T	C	0.012	0.0027	6.89e-06
beta-hydroxyisovalerate	rs6952850	A	G	-0.012	0.0027	6.88e-06
beta-hydroxyisovalerate	rs2024138	A	G	0.0316	0.007	6.84e-06
beta-hydroxyisovalerate	rs529736	A	C	-0.0159	0.0035	5.87e-06
beta-hydroxyisovalerate	rs10032150	A	G	0.0123	0.0027	5.59e-06
beta-hydroxyisovalerate	rs1154510	T	C	-0.0196	0.0043	5.27e-06
beta-hydroxyisovalerate	rs9347123	A	T	-0.0121	0.0026	5.02e-06
beta-hydroxyisovalerate	rs9460599	T	C	0.0302	0.0066	4.86e-06
beta-hydroxyisovalerate	rs4307025	A	T	-0.0124	0.0027	4.85e-06
beta-hydroxyisovalerate	rs1448817	A	G	0.0124	0.0027	4.56e-06
beta-hydroxyisovalerate	rs9878953	A	G	-0.0199	0.0043	4.4e-06
beta-hydroxyisovalerate	rs11855844	A	G	-0.0168	0.0037	4.38e-06
beta-hydroxyisovalerate	rs11869714	A	G	-0.0126	0.0027	4.25e-06
beta-hydroxyisovalerate	rs1182927	T	C	-0.0167	0.0036	3.98e-06
beta-hydroxyisovalerate	rs1337278	A	G	0.0124	0.0027	3.68e-06
beta-hydroxyisovalerate	rs7541661	A	G	0.0125	0.0027	3.66e-06
beta-hydroxyisovalerate	rs905113	T	C	0.0122	0.0026	3.63e-06
beta-hydroxyisovalerate	rs3778889	T	C	0.0246	0.0053	3.42e-06
beta-hydroxyisovalerate	rs789195	A	G	-0.0128	0.0027	2.53e-06
beta-hydroxyisovalerate	rs7660017	A	G	-0.0131	0.0028	2.34e-06
beta-hydroxyisovalerate	rs11605057	T	C	-0.0202	0.0043	2.24e-06
beta-hydroxyisovalerate	rs1169077	A	G	-0.0171	0.0036	2.02e-06
beta-hydroxyisovalerate	rs6883568	C	G	-0.0388	0.0081	1.89e-06
beta-hydroxyisovalerate	rs830122	T	C	0.0172	0.0036	1.84e-06
beta-hydroxyisovalerate	rs6791884	A	G	-0.0129	0.0027	1.78e-06
beta-hydroxyisovalerate	rs11858062	T	C	0.0213	0.0044	1.65e-06
beta-hydroxyisovalerate	rs6788905	A	G	-0.0206	0.0043	1.48e-06
beta-hydroxyisovalerate	rs7632904	A	C	0.0252	0.0052	1.43e-06
beta-hydroxyisovalerate	rs1501540	A	G	0.013	0.0027	1.17e-06
beta-hydroxyisovalerate	rs4772985	T	C	-0.0133	0.0027	1.16e-06
beta-hydroxyisovalerate	rs17477579	T	C	-0.0133	0.0027	1.01e-06
beta-hydroxyisovalerate	rs17477607	T	G	-0.0133	0.0027	1.01e-06
beta-hydroxyisovalerate	rs17386538	T	C	-0.0133	0.0027	9.95e-07
beta-hydroxyisovalerate	rs12950972	T	C	-0.0133	0.0027	9.84e-07
beta-hydroxyisovalerate	rs17386586	A	C	-0.0134	0.0027	9.74e-07
beta-hydroxyisovalerate	rs6477873	T	C	0.0131	0.0027	9.51e-07
beta-hydroxyisovalerate	rs4384192	T	C	0.013	0.0026	9.35e-07
beta-hydroxyisovalerate	rs12062610	A	G	-0.013	0.0026	9.34e-07
beta-hydroxyisovalerate	rs1393025	T	C	-0.013	0.0026	9.33e-07
beta-hydroxyisovalerate	rs905108	A	T	0.013	0.0026	8.87e-07
beta-hydroxyisovalerate	rs1542885	T	C	0.0131	0.0027	8.13e-07
beta-hydroxyisovalerate	rs6675139	C	G	0.0131	0.0027	7.57e-07
beta-hydroxyisovalerate	rs7544738	A	G	0.0132	0.0027	7.15e-07
beta-hydroxyisovalerate	rs1542884	T	C	0.0132	0.0027	7.15e-07
beta-hydroxyisovalerate	rs9811126	A	G	0.0216	0.0044	6.87e-07
beta-hydroxyisovalerate	rs4074110	A	G	0.0134	0.0027	6.79e-07
beta-hydroxyisovalerate	rs2707056	A	T	0.018	0.0036	6.09e-07
beta-hydroxyisovalerate	rs853758	A	T	0.0182	0.0036	4.76e-07
beta-hydroxyisovalerate	rs13099939	A	C	-0.0136	0.0027	4.67e-07
beta-hydroxyisovalerate	rs895958	A	G	0.0183	0.0036	4.34e-07
beta-hydroxyisovalerate	rs493519	T	C	-0.0183	0.0036	4.17e-07
beta-hydroxyisovalerate	rs7446718	A	G	-0.0417	0.0082	3.83e-07
beta-hydroxyisovalerate	rs9457799	T	G	0.0182	0.0036	3.03e-07
beta-hydroxyisovalerate	rs2270967	A	G	-0.0138	0.0027	2.75e-07
beta-hydroxyisovalerate	rs7640612	A	C	-0.0138	0.0027	2.54e-07
beta-hydroxyisovalerate	rs10937106	A	G	-0.0138	0.0027	2.39e-07
beta-hydroxyisovalerate	rs895959	T	C	0.0188	0.0036	2.08e-07
beta-hydroxyisovalerate	rs7314056	T	C	-0.0188	0.0036	1.93e-07
beta-hydroxyisovalerate	rs11928508	C	G	0.014	0.0027	1.88e-07
beta-hydroxyisovalerate	rs2230681	T	C	-0.0191	0.0037	1.65e-07
beta-hydroxyisovalerate	rs9668191	A	G	-0.019	0.0036	1.4e-07
beta-hydroxyisovalerate	rs9295118	A	T	-0.0188	0.0036	1.33e-07
beta-hydroxyisovalerate	rs1185260	A	G	-0.0191	0.0036	1.14e-07
beta-hydroxyisovalerate	rs2270968	T	G	0.0143	0.0027	1.12e-07
beta-hydroxyisovalerate	rs10455860	T	C	0.0188	0.0035	1.05e-07
beta-hydroxyisovalerate	rs12486983	T	C	0.0144	0.0027	9.74e-08
beta-hydroxyisovalerate	rs9841498	T	C	0.0145	0.0027	7.12e-08
beta-hydroxyisovalerate	rs6917747	A	G	0.0194	0.0036	4.66e-08
beta-hydroxyisovalerate	rs10945649	A	T	0.0212	0.0036	4.29e-09
betaine	rs13213986	A	T	-0.0154	0.0035	9.99e-06
betaine	rs4327704	A	C	-0.0219	0.005	9.94e-06
betaine	rs12190141	A	G	0.0616	0.0139	9.9e-06
betaine	rs17595065	A	G	0.0347	0.0078	9.73e-06
betaine	rs149990	A	G	-0.012	0.0027	9.53e-06
betaine	rs3117425	T	C	-0.0154	0.0035	9.19e-06
betaine	rs13200214	T	C	-0.0153	0.0035	9.16e-06
betaine	rs3760188	T	C	-0.0079	0.0018	8.97e-06
betaine	rs750546	T	C	-0.0079	0.0018	8.96e-06
betaine	rs17750424	T	C	0.0156	0.0035	8.9e-06
betaine	rs13193480	A	G	0.0156	0.0035	8.87e-06
betaine	rs9886534	T	C	-0.0079	0.0018	8.74e-06
betaine	rs2204060	T	C	-0.0108	0.0024	8.46e-06
betaine	rs11943623	A	G	-0.0115	0.0026	8.4e-06
betaine	rs2296804	C	G	-0.0106	0.0024	8.4e-06
betaine	rs7896866	A	C	0.0108	0.0024	8.34e-06
betaine	rs9981490	A	G	-0.0079	0.0018	8.29e-06
betaine	rs4646343	T	G	-0.008	0.0018	8.28e-06
betaine	rs429479	A	G	0.0154	0.0035	8.21e-06
betaine	rs4713133	T	C	0.0114	0.0026	8.19e-06
betaine	rs7781104	T	C	0.0208	0.0047	7.76e-06
betaine	rs13215275	T	G	-0.0158	0.0035	7.42e-06
betaine	rs13210634	A	G	0.0158	0.0035	7.41e-06
betaine	rs13217620	T	C	-0.0158	0.0035	7.41e-06
betaine	rs4646344	A	G	0.008	0.0018	7.22e-06
betaine	rs6908726	C	G	0.0155	0.0035	7.17e-06
betaine	rs1233385	T	C	0.0153	0.0034	7.16e-06
betaine	rs4672596	T	C	0.0107	0.0024	7.15e-06
betaine	rs442694	T	G	-0.0156	0.0035	6.99e-06
betaine	rs1233393	C	G	0.0153	0.0034	6.82e-06
betaine	rs633159	A	G	-0.011	0.0024	6.8e-06
betaine	rs6502603	T	G	-0.008	0.0018	6.77e-06
betaine	rs10937433	C	G	0.008	0.0018	6.62e-06
betaine	rs4142151	T	C	-0.0111	0.0025	6.53e-06
betaine	rs17734739	T	C	-0.0116	0.0026	6.47e-06
betaine	rs163133	A	T	-0.0114	0.0025	6.33e-06
betaine	rs17693963	A	C	0.0158	0.0035	6.22e-06
betaine	rs10164524	A	G	-0.011	0.0024	6.04e-06
betaine	rs12569219	A	C	-0.0118	0.0026	5.82e-06
betaine	rs7668550	T	G	-0.0368	0.0081	5.54e-06
betaine	rs9257800	T	C	-0.0159	0.0035	5e-06
betaine	rs11953102	C	G	-0.0117	0.0026	4.88e-06
betaine	rs163125	A	G	0.0116	0.0025	4.87e-06
betaine	rs981715	A	G	0.012	0.0026	4.69e-06
betaine	rs981714	C	G	0.012	0.0026	4.67e-06
betaine	rs3797248	A	G	0.012	0.0026	4.62e-06
betaine	rs2396726	T	C	-0.0179	0.0039	4.52e-06
betaine	rs42418	C	G	-0.0109	0.0024	4.47e-06
betaine	rs11651620	A	G	-0.0082	0.0018	4.12e-06
betaine	rs4646387	T	G	-0.0082	0.0018	4.07e-06
betaine	rs4646389	A	C	-0.0082	0.0018	4.04e-06
betaine	rs163126	T	C	-0.0117	0.0025	3.64e-06
betaine	rs4646392	A	C	-0.0083	0.0018	3.64e-06
betaine	rs4714634	A	G	0.0083	0.0018	3.63e-06
betaine	rs4673559	A	G	0.0116	0.0025	3.53e-06
betaine	rs936108	T	C	-0.0083	0.0018	3.46e-06
betaine	rs2371027	T	C	0.0112	0.0024	3.45e-06
betaine	rs986294	A	G	-0.0116	0.0025	3.38e-06
betaine	rs12998006	T	C	0.0116	0.0025	3.24e-06
betaine	rs4646359	T	C	-0.0083	0.0018	3.2e-06
betaine	rs13202295	T	C	-0.0163	0.0035	3.17e-06
betaine	rs1233493	A	G	0.0161	0.0035	3.15e-06
betaine	rs13000743	A	G	-0.0113	0.0024	3.08e-06
betaine	rs216244	T	G	0.014	0.003	3.06e-06
betaine	rs17750747	T	C	0.0164	0.0035	2.89e-06
betaine	rs9974224	T	C	0.0194	0.0042	2.85e-06
betaine	rs1024898	A	G	0.0114	0.0024	2.75e-06
betaine	rs2371034	A	G	-0.0114	0.0024	2.74e-06
betaine	rs406511	C	G	0.0162	0.0034	2.66e-06
betaine	rs164372	T	C	0.012	0.0025	2.64e-06
betaine	rs7126003	T	C	0.0185	0.0039	2.58e-06
betaine	rs1233480	T	C	-0.0163	0.0035	2.47e-06
betaine	rs12463963	T	C	0.0118	0.0025	2.44e-06
betaine	rs10153066	T	G	0.0085	0.0018	2.12e-06
betaine	rs404240	A	G	0.0164	0.0035	2.07e-06
betaine	rs2160847	T	C	0.0149	0.0031	2.05e-06
betaine	rs1233489	A	T	-0.0165	0.0035	2.03e-06
betaine	rs2746149	T	C	0.0165	0.0035	1.88e-06
betaine	rs13021675	T	C	-0.0123	0.0026	1.84e-06
betaine	rs17734637	C	G	-0.0122	0.0026	1.82e-06
betaine	rs4142153	C	G	-0.0117	0.0025	1.78e-06
betaine	rs152727	T	C	-0.0121	0.0025	1.71e-06
betaine	rs10490328	A	G	0.0118	0.0025	1.67e-06
betaine	rs1233491	C	G	-0.0167	0.0035	1.61e-06
betaine	rs2523443	A	C	-0.0167	0.0035	1.57e-06
betaine	rs216250	A	G	-0.0129	0.0027	1.51e-06
betaine	rs2887915	T	C	0.0117	0.0024	1.22e-06
betaine	rs558133	A	C	0.0117	0.0024	1.17e-06
betaine	rs16876693	T	C	-0.0115	0.0024	1.06e-06
betaine	rs12470730	T	C	0.0124	0.0025	9.91e-07
betaine	rs13402741	C	G	-0.0121	0.0025	9.77e-07
betaine	rs2371022	A	G	0.0121	0.0025	9.76e-07
betaine	rs2371023	A	G	0.0121	0.0025	9.74e-07
betaine	rs2371025	T	C	-0.0121	0.0025	9.71e-07
betaine	rs13016820	A	G	0.0121	0.0025	9.69e-07
betaine	rs16844814	T	C	-0.0121	0.0025	9.69e-07
betaine	rs2371019	T	G	-0.0121	0.0025	9.68e-07
betaine	rs10445807	T	C	-0.0121	0.0025	9.67e-07
betaine	rs13415037	T	G	-0.0121	0.0025	9.67e-07
betaine	rs4467202	A	G	-0.0121	0.0025	9.66e-07
betaine	rs12623361	T	C	0.0121	0.0025	9.59e-07
betaine	rs12470865	A	C	0.0121	0.0025	9.53e-07
betaine	rs4142152	T	C	0.0121	0.0025	9.29e-07
betaine	rs16831173	A	C	0.0124	0.0025	9.28e-07
betaine	rs9288420	A	G	0.0121	0.0025	8.73e-07
betaine	rs1234844	T	G	0.017	0.0035	8.62e-07
betaine	rs1233494	T	C	0.0171	0.0035	8.56e-07
betaine	rs2206853	T	C	-0.0171	0.0035	8.52e-07
betaine	rs2143668	A	T	0.0171	0.0035	8.41e-07
betaine	rs13177425	A	T	0.0117	0.0024	7.31e-07
betaine	rs13386028	A	C	0.0118	0.0024	7.12e-07
betaine	rs163124	T	G	0.0121	0.0024	7.08e-07
betaine	rs408623	T	G	-0.0172	0.0035	6.81e-07
betaine	rs389419	T	C	-0.0172	0.0035	6.74e-07
betaine	rs3847946	T	C	-0.0119	0.0024	6.69e-07
betaine	rs4673558	T	C	-0.0123	0.0025	6.5e-07
betaine	rs7702523	T	C	0.0118	0.0024	6.5e-07
betaine	rs4704556	T	C	-0.0118	0.0024	6.13e-07
betaine	rs3930426	T	C	-0.0118	0.0024	5.99e-07
betaine	rs7732681	T	C	-0.0118	0.0024	5.96e-07
betaine	rs10928521	C	G	0.0123	0.0025	5.88e-07
betaine	rs694290	A	G	0.0121	0.0024	5.76e-07
betaine	rs216242	A	T	0.015	0.003	5.73e-07
betaine	rs6453436	A	G	0.0119	0.0024	5.25e-07
betaine	rs7736709	C	G	-0.0119	0.0024	5.16e-07
betaine	rs13182115	T	G	-0.0125	0.0025	4.97e-07
betaine	rs17692962	A	C	0.0124	0.0025	4.77e-07
betaine	rs13427841	T	C	0.0126	0.0025	4.66e-07
betaine	rs1535039	T	C	0.0175	0.0035	4.49e-07
betaine	rs8180502	A	G	0.0123	0.0024	3.95e-07
betaine	rs13404853	A	C	0.0126	0.0025	3.63e-07
betaine	rs10490320	T	C	-0.0123	0.0024	3.59e-07
betaine	rs3818554	T	C	0.0091	0.0018	3.09e-07
betaine	rs7714738	C	G	-0.0121	0.0024	2.7e-07
betaine	rs2274514	T	C	0.0092	0.0018	2.28e-07
betaine	rs2274517	T	C	0.0092	0.0018	2.13e-07
betaine	rs13215983	T	C	0.0093	0.0018	2.01e-07
betaine	rs9462856	T	C	-0.0093	0.0018	2e-07
betaine	rs2291922	A	G	0.0126	0.0024	1.95e-07
betaine	rs6860725	T	C	-0.0126	0.0024	1.79e-07
betaine	rs2371015	T	C	0.0125	0.0024	1.72e-07
betaine	rs6864184	A	G	0.0124	0.0024	1.53e-07
betaine	rs570680	T	G	0.021	0.004	1.52e-07
betaine	rs506500	T	C	-0.0127	0.0024	1.45e-07
betaine	rs11887861	A	C	0.0127	0.0024	1.43e-07
betaine	rs10043008	T	G	-0.0124	0.0024	1.41e-07
betaine	rs11701048	T	C	0.0185	0.0035	1.19e-07
betaine	rs10514159	T	C	0.0127	0.0024	7.71e-08
betaine	rs7704383	T	C	-0.0127	0.0024	7.16e-08
betaine	rs10072296	T	C	0.0127	0.0024	7.06e-08
betaine	rs1870057	T	C	0.0127	0.0024	7e-08
betaine	rs6891335	A	G	-0.0127	0.0024	6.74e-08
betaine	rs12151827	T	C	-0.0141	0.0026	6.35e-08
betaine	rs2607144	A	C	0.0129	0.0024	5.86e-08
betaine	rs7684	T	G	-0.0132	0.0024	5.21e-08
betaine	rs6414979	T	G	-0.013	0.0024	5.12e-08
betaine	rs2591392	A	G	0.013	0.0024	5.12e-08
betaine	rs3733886	T	G	-0.0129	0.0024	4.81e-08
betaine	rs12329764	A	G	0.019	0.0035	4.7e-08
betaine	rs9982015	T	C	-0.0193	0.0035	3.63e-08
betaine	rs1062326	T	G	0.0132	0.0024	3.04e-08
betaine	rs2291920	T	C	-0.0135	0.0024	2.96e-08
betaine	rs10505717	T	C	-0.0135	0.0024	2.74e-08
betaine	rs12368193	A	G	-0.0135	0.0024	2.59e-08
betaine	rs13182512	A	T	0.0134	0.0024	2.06e-08
betaine	rs7700970	T	C	-0.0173	0.0031	1.83e-08
betaine	rs9293761	A	G	0.0133	0.0024	1.74e-08
betaine	rs12189248	T	C	0.0136	0.0024	1.41e-08
betaine	rs949645	A	T	0.014	0.0025	1.35e-08
betaine	rs6893970	A	G	-0.0273	0.0048	1.28e-08
betaine	rs4704552	A	G	-0.0137	0.0024	9.91e-09
betaine	rs478651	T	C	-0.0135	0.0024	9.29e-09
betaine	rs1870058	A	G	0.014	0.0024	8.33e-09
betaine	rs9637825	C	G	0.0139	0.0024	6.11e-09
betaine	rs6711167	A	T	-0.0188	0.0032	5.98e-09
betaine	rs2607142	T	C	-0.0139	0.0024	5.03e-09
betaine	rs2591386	T	C	0.0139	0.0024	5.02e-09
betaine	rs13165414	T	C	0.0139	0.0024	5.01e-09
betaine	rs4560045	A	T	-0.0147	0.0025	5e-09
betaine	rs10805925	A	G	-0.0139	0.0024	5e-09
betaine	rs10474578	T	C	-0.0139	0.0024	5e-09
betaine	rs6874525	T	C	-0.0139	0.0024	4.97e-09
betaine	rs1316753	C	G	0.0139	0.0024	4.97e-09
betaine	rs2607145	A	G	-0.014	0.0024	4.79e-09
betaine	rs2607140	T	C	0.014	0.0024	4.76e-09
betaine	rs17776067	T	C	-0.0196	0.0033	4.46e-09
betaine	rs163132	T	C	0.0144	0.0025	4.37e-09
betaine	rs3797535	T	C	-0.0245	0.0042	3.95e-09
betaine	rs10932355	A	G	0.015	0.0025	3.76e-09
betaine	rs10074882	A	G	0.0142	0.0024	2.87e-09
betaine	rs4704546	A	G	0.0142	0.0024	2.78e-09
betaine	rs2291919	A	C	-0.0148	0.0025	2.58e-09
betaine	rs2131978	A	G	-0.0142	0.0024	2.38e-09
betaine	rs2220839	A	T	-0.0142	0.0024	2.3e-09
betaine	rs6889383	T	C	0.0143	0.0024	2.27e-09
betaine	rs7711939	T	C	0.0143	0.0024	2.27e-09
betaine	rs6586282	T	C	0.0155	0.0026	1.97e-09
betaine	rs17775871	A	G	0.0196	0.0032	1.68e-09
betaine	rs2287413	C	G	0.0195	0.0032	1.5e-09
betaine	rs12659709	C	G	-0.0144	0.0024	1.18e-09
betaine	rs2166343	A	G	-0.0146	0.0024	1.07e-09
betaine	rs2121107	T	C	0.0146	0.0024	1.05e-09
betaine	rs10044259	T	C	-0.0146	0.0024	1.05e-09
betaine	rs10069036	A	T	-0.0146	0.0024	1.05e-09
betaine	rs12659618	A	G	0.0146	0.0024	1.05e-09
betaine	rs10942887	T	G	0.0146	0.0024	1.04e-09
betaine	rs10490327	A	G	-0.0197	0.0032	9.6e-10
betaine	rs2364594	A	G	0.0147	0.0024	9.3e-10
betaine	rs1291041	T	G	0.0146	0.0024	9.03e-10
betaine	rs12613336	T	C	0.0154	0.0025	8.98e-10
betaine	rs13158309	A	G	-0.0145	0.0024	8.48e-10
betaine	rs949644	A	G	-0.0147	0.0024	8.05e-10
betaine	rs4703773	T	C	0.0148	0.0024	6.07e-10
betaine	rs10078815	T	C	0.0148	0.0024	6.04e-10
betaine	rs6893527	A	G	-0.0148	0.0024	5.1e-10
betaine	rs10060869	A	G	-0.015	0.0024	4.24e-10
betaine	rs6453431	C	G	0.0149	0.0024	3.79e-10
betaine	rs12655567	C	G	-0.015	0.0024	2.88e-10
betaine	rs3829809	C	G	-0.0152	0.0024	2.87e-10
betaine	rs495360	A	C	-0.019	0.003	2.4e-10
betaine	rs7710824	A	C	-0.0158	0.0025	1.63e-10
betaine	rs955897	A	C	-0.0153	0.0024	1.42e-10
betaine	rs1915706	T	C	0.0154	0.0024	1.33e-10
betaine	rs1275103	C	G	-0.0155	0.0024	6.84e-11
betaine	rs567754	T	C	0.0162	0.0025	4.96e-11
betaine	rs10172053	T	G	0.0168	0.0026	4.53e-11
betaine	rs2216405	A	G	0.0168	0.0025	4.03e-11
betaine	rs7421152	A	T	0.0171	0.0026	2.12e-11
betaine	rs10490325	C	G	0.0171	0.0026	2.04e-11
betaine	rs10206976	T	G	-0.0171	0.0026	2.03e-11
betaine	rs2851391	T	C	-0.0121	0.0018	1.15e-11
betaine	rs463614	A	C	-0.0164	0.0024	3.4e-12
betaine	rs4673546	T	C	-0.0175	0.0025	3.26e-12
betaine	rs16844825	A	G	0.0176	0.0025	3.08e-12
betaine	rs2193617	A	G	-0.0176	0.0025	2.95e-12
betaine	rs16844874	T	C	0.0178	0.0026	2.9e-12
betaine	rs4513233	A	G	-0.0178	0.0026	2.87e-12
betaine	rs10490322	T	C	-0.0178	0.0025	2.24e-12
betaine	rs11680929	A	G	-0.0178	0.0025	2.23e-12
betaine	rs10490324	T	C	-0.0178	0.0025	2.22e-12
betaine	rs2445887	A	G	-0.0166	0.0023	1.37e-12
betaine	rs16844839	T	C	-0.0182	0.0026	1.34e-12
betaine	rs499368	A	T	-0.0191	0.0027	8.14e-13
betaine	rs190335	T	C	0.0168	0.0023	7.8e-13
betaine	rs559088	C	G	0.0173	0.0024	3.11e-13
betaine	rs16844862	T	C	-0.0185	0.0025	2.87e-13
betaine	rs10490323	A	G	-0.0185	0.0025	2.87e-13
betaine	rs3815630	T	C	0.0185	0.0025	2.87e-13
betaine	rs651852	T	C	0.0174	0.0024	1.46e-13
betaine	rs1717570	A	G	-0.0181	0.0024	5.48e-14
betaine	rs2461248	A	T	-0.0178	0.0023	2.66e-14
betaine	rs562487	A	G	0.0181	0.0024	1.77e-14
betaine	rs6453424	A	C	-0.0186	0.0024	9.77e-15
betaine	rs2034900	A	G	-0.0187	0.0024	6.69e-15
betaine	rs586199	A	G	0.0184	0.0023	3.44e-15
betaine	rs10944	T	G	-0.0185	0.0023	2.4e-15
betaine	rs532964	A	G	-0.019	0.0024	2.33e-15
betaine	rs6862283	T	C	0.0193	0.0024	7.93e-16
betaine	rs248378	A	G	0.0189	0.0023	4.46e-16
betaine	rs557302	A	G	-0.0192	0.0023	2.44e-16
betaine	rs248380	T	C	-0.0192	0.0023	2.32e-16
betaine	rs248381	A	G	0.0192	0.0023	2.19e-16
betaine	rs17223387	C	G	-0.0201	0.0025	2.17e-16
betaine	rs11960388	A	T	-0.0274	0.0033	1.92e-16
betaine	rs185077	T	C	-0.0193	0.0023	1.54e-16
betaine	rs7709472	A	T	-0.0198	0.0024	1.41e-16
betaine	rs2461249	A	G	-0.0194	0.0023	1.16e-16
betaine	rs7709757	T	C	0.0199	0.0024	1.11e-16
betaine	rs2034899	T	G	0.0199	0.0024	1.05e-16
betaine	rs2303129	T	C	0.02	0.0024	7.95e-17
betaine	rs3797539	A	C	-0.02	0.0024	7.88e-17
betaine	rs3797538	A	G	0.02	0.0024	7.88e-17
betaine	rs1644004	A	G	-0.0195	0.0023	7.57e-17
betaine	rs731124	T	C	-0.0201	0.0024	6.77e-17
betaine	rs6875201	A	G	0.0282	0.0034	6.24e-17
betaine	rs16876363	A	C	-0.0202	0.0024	6.07e-17
betaine	rs403224	T	G	-0.0196	0.0023	4.9e-17
betaine	rs248383	T	C	0.0196	0.0023	4.48e-17
betaine	rs248384	T	C	-0.0196	0.0023	4.43e-17
betaine	rs248385	C	G	-0.0196	0.0023	4.36e-17
betaine	rs727674	A	T	0.0203	0.0024	3.86e-17
betaine	rs2049163	T	C	-0.0204	0.0024	2.88e-17
betaine	rs7710133	T	C	-0.0202	0.0024	1.59e-17
betaine	rs6859544	C	G	-0.0205	0.0024	1.57e-17
betaine	rs6860801	C	G	0.0205	0.0024	1.36e-17
betaine	rs16876302	T	C	0.0205	0.0024	1.3e-17
betaine	rs6881725	T	C	0.0207	0.0024	9.21e-18
betaine	rs1805073	C	G	-0.0207	0.0024	8.02e-18
betaine	rs933683	T	G	-0.0207	0.0024	7.97e-18
betaine	rs1805074	A	G	0.0207	0.0024	7.97e-18
betaine	rs933684	A	C	0.0207	0.0024	7.97e-18
betaine	rs7731142	A	C	0.0207	0.0024	6.3e-18
betaine	rs6873326	T	C	0.0291	0.0034	5.18e-18
betaine	rs4673553	T	G	0.0155	0.0018	3.62e-18
betaine	rs6894156	T	C	-0.0296	0.0034	1.72e-18
betaine	rs921943	T	C	-0.0216	0.0025	1.27e-18
betaine	rs7736376	T	C	0.0298	0.0034	6.75e-19
betaine	rs17823744	A	G	0.0297	0.0033	4.96e-19
betaine	rs7732845	A	G	0.0298	0.0033	4.52e-19
betaine	rs17823642	T	C	-0.03	0.0034	4.1e-19
betaine	rs16876503	A	G	0.03	0.0034	3.66e-19
betaine	rs16876500	T	C	-0.0301	0.0034	3.02e-19
betaine	rs16876512	T	C	-0.0302	0.0034	2.87e-19
betaine	rs16876498	T	C	0.0301	0.0034	2.55e-19
betaine	rs17823774	C	G	0.0303	0.0034	2.1e-19
betaine	rs715	T	C	0.0221	0.0025	2.08e-19
betaine	rs6883815	A	G	-0.0304	0.0034	1.84e-19
betaine	rs16876394	T	C	0.0304	0.0034	1.49e-19
carnitine	rs13182115	T	G	0.0041	0.0009	9.99e-06
carnitine	rs1014486	T	C	0.004	0.0009	9.98e-06
carnitine	rs7662505	A	T	-0.004	0.0009	9.98e-06
carnitine	rs2412005	A	T	-0.004	0.0009	9.95e-06
carnitine	rs2253366	A	T	0.004	0.0009	9.92e-06
carnitine	rs9317240	A	G	-0.004	0.0009	9.92e-06
carnitine	rs9530481	T	C	0.004	0.0009	9.9e-06
carnitine	rs501720	A	C	-0.004	0.0009	9.9e-06
carnitine	rs12650354	T	C	0.0329	0.0074	9.89e-06
carnitine	rs496150	A	G	-0.004	0.0009	9.88e-06
carnitine	rs2360635	A	G	0.004	0.0009	9.86e-06
carnitine	rs4859971	T	C	0.004	0.0009	9.86e-06
carnitine	rs515280	C	G	0.004	0.0009	9.85e-06
carnitine	rs519932	T	G	-0.004	0.0009	9.85e-06
carnitine	rs12817660	A	G	-0.004	0.0009	9.81e-06
carnitine	rs2223928	T	C	0.004	0.0009	9.81e-06
carnitine	rs2164183	T	G	-0.004	0.0009	9.8e-06
carnitine	rs480662	A	G	-0.004	0.0009	9.73e-06
carnitine	rs7517302	T	C	0.004	0.0009	9.64e-06
carnitine	rs1507101	A	G	0.004	0.0009	9.63e-06
carnitine	rs2327855	A	C	0.004	0.0009	9.55e-06
carnitine	rs11085752	A	C	-0.004	0.0009	9.54e-06
carnitine	rs5999027	T	C	-0.004	0.0009	9.52e-06
carnitine	rs10515456	A	G	-0.0075	0.0017	9.48e-06
carnitine	rs2133813	T	C	0.0041	0.0009	9.47e-06
carnitine	rs9530477	T	C	0.004	0.0009	9.46e-06
carnitine	rs12980652	A	T	-0.0145	0.0033	9.45e-06
carnitine	rs1399	A	G	0.004	0.0009	9.45e-06
carnitine	rs1886098	A	G	-0.0142	0.0032	9.44e-06
carnitine	rs2839471	T	C	-0.004	0.0009	9.41e-06
carnitine	rs11749859	T	C	-0.004	0.0009	9.39e-06
carnitine	rs9544060	T	C	0.004	0.0009	9.36e-06
carnitine	rs1397	C	G	0.004	0.0009	9.35e-06
carnitine	rs220168	A	G	-0.004	0.0009	9.33e-06
carnitine	rs9415044	T	G	-0.004	0.0009	9.31e-06
carnitine	rs12803813	T	C	0.004	0.0009	9.3e-06
carnitine	rs7837480	A	G	-0.004	0.0009	9.3e-06
carnitine	rs1482567	T	C	0.004	0.0009	9.3e-06
carnitine	rs1323567	T	C	-0.004	0.0009	9.29e-06
carnitine	rs4669392	A	G	-0.004	0.0009	9.29e-06
carnitine	rs10784751	A	T	0.004	0.0009	9.29e-06
carnitine	rs1915990	A	G	-0.0077	0.0017	9.27e-06
carnitine	rs246946	T	C	0.0041	0.0009	9.26e-06
carnitine	rs13284789	T	C	0.0079	0.0018	9.19e-06
carnitine	rs718150	A	G	-0.004	0.0009	9.18e-06
carnitine	rs969394	A	G	-0.004	0.0009	9.15e-06
carnitine	rs1323566	A	G	0.004	0.0009	9.15e-06
carnitine	rs9600572	A	G	-0.004	0.0009	9.14e-06
carnitine	rs9600575	A	G	-0.004	0.0009	9.12e-06
carnitine	rs478982	A	G	0.004	0.0009	9.11e-06
carnitine	rs970446	A	C	0.004	0.0009	9.09e-06
carnitine	rs2225978	A	C	-0.004	0.0009	9.08e-06
carnitine	rs9863328	T	C	0.004	0.0009	9.08e-06
carnitine	rs1109773	C	G	0.004	0.0009	9.03e-06
carnitine	rs1544811	A	G	0.004	0.0009	8.99e-06
carnitine	rs3905228	A	C	0.0041	0.0009	8.96e-06
carnitine	rs4743692	A	G	-0.004	0.0009	8.95e-06
carnitine	rs1450681	A	G	-0.004	0.0009	8.95e-06
carnitine	rs4743691	A	G	0.004	0.0009	8.95e-06
carnitine	rs2000069	T	C	0.0041	0.0009	8.87e-06
carnitine	rs1953127	T	C	-0.004	0.0009	8.86e-06
carnitine	rs1447030	T	C	-0.004	0.0009	8.86e-06
carnitine	rs7331579	C	G	0.004	0.0009	8.86e-06
carnitine	rs4743694	C	G	-0.004	0.0009	8.86e-06
carnitine	rs7872170	A	G	0.004	0.0009	8.83e-06
carnitine	rs9960949	A	G	-0.0042	0.0009	8.83e-06
carnitine	rs7026246	A	C	-0.004	0.0009	8.83e-06
carnitine	rs10119876	T	G	-0.004	0.0009	8.82e-06
carnitine	rs10820618	A	T	0.004	0.0009	8.82e-06
carnitine	rs9974470	A	T	-0.004	0.0009	8.81e-06
carnitine	rs10991141	T	C	-0.004	0.0009	8.81e-06
carnitine	rs2714684	C	G	-0.004	0.0009	8.8e-06
carnitine	rs1275103	C	G	0.004	0.0009	8.79e-06
carnitine	rs3118816	A	C	-0.004	0.0009	8.79e-06
carnitine	rs1507507	A	G	-0.004	0.0009	8.78e-06
carnitine	rs10956672	A	C	0.004	0.0009	8.76e-06
carnitine	rs6494149	A	G	-0.004	0.0009	8.71e-06
carnitine	rs2544371	A	G	0.004	0.0009	8.69e-06
carnitine	rs6948474	A	T	0.0077	0.0017	8.6e-06
carnitine	rs10772367	C	G	-0.004	0.0009	8.58e-06
carnitine	rs6581708	T	C	0.004	0.0009	8.57e-06
carnitine	rs1250070	A	G	-0.0042	0.0009	8.56e-06
carnitine	rs4742907	A	G	0.004	0.0009	8.55e-06
carnitine	rs2055802	A	G	0.004	0.0009	8.53e-06
carnitine	rs12587546	A	G	-0.0041	0.0009	8.46e-06
carnitine	rs4771416	T	C	-0.004	0.0009	8.46e-06
carnitine	rs9518622	T	C	0.004	0.0009	8.43e-06
carnitine	rs10917994	T	C	-0.0041	0.0009	8.43e-06
carnitine	rs657535	A	G	-0.004	0.0009	8.43e-06
carnitine	rs8043243	T	C	-0.004	0.0009	8.41e-06
carnitine	rs9518625	A	G	-0.004	0.0009	8.39e-06
carnitine	rs8134847	T	C	0.0041	0.0009	8.38e-06
carnitine	rs2124990	T	C	-0.004	0.0009	8.38e-06
carnitine	rs7320884	T	C	-0.004	0.0009	8.37e-06
carnitine	rs4468458	A	G	-0.004	0.0009	8.37e-06
carnitine	rs1443837	A	G	0.004	0.0009	8.35e-06
carnitine	rs7940551	T	C	-0.004	0.0009	8.33e-06
carnitine	rs2767290	A	G	0.004	0.0009	8.33e-06
carnitine	rs9518630	T	C	-0.004	0.0009	8.29e-06
carnitine	rs4885359	T	G	-0.004	0.0009	8.19e-06
carnitine	rs6832027	A	G	0.004	0.0009	8.16e-06
carnitine	rs902013	T	G	-0.004	0.0009	8.08e-06
carnitine	rs2119588	A	G	0.0041	0.0009	8.04e-06
carnitine	rs3900685	A	C	-0.0178	0.004	8e-06
carnitine	rs7686890	T	C	0.004	0.0009	7.99e-06
carnitine	rs4771417	T	C	0.004	0.0009	7.94e-06
carnitine	rs9518632	T	C	0.004	0.0009	7.88e-06
carnitine	rs12867127	T	G	-0.004	0.0009	7.84e-06
carnitine	rs10438357	A	G	-0.004	0.0009	7.82e-06
carnitine	rs12417365	T	C	-0.004	0.0009	7.82e-06
carnitine	rs9544069	T	G	-0.004	0.0009	7.8e-06
carnitine	rs7121966	A	G	0.004	0.0009	7.8e-06
carnitine	rs1866570	C	G	-0.004	0.0009	7.76e-06
carnitine	rs12757533	A	T	-0.0041	0.0009	7.67e-06
carnitine	rs9518633	A	T	-0.004	0.0009	7.67e-06
carnitine	rs555908	T	C	-0.0041	0.0009	7.64e-06
carnitine	rs482275	T	C	0.0041	0.0009	7.61e-06
[truncated: 7,272 more rows]
